# Supplementary material for: Productive Hepatitis C Virus Infection of Stem Cell-Derived Hepatocytes Reveals a Critical Transition to Viral Permissiveness during Differentiation
Source: PLoS Pathog. 2012 Apr 5;8(4):e1002617. doi: 10.1371/journal.ppat.1002617 (PMC3320597; doi:10.1371/journal.ppat.1002617)
Supplement: Dataset S1 — Microarray data comparing gene expression profiles of day-7 and day-10 cells. List of genes and their changes (folds up- or down- regulated) from day-7 to day-10 are shown for two independent microarray experiments. (XLSX) [file ppat.1002617.s001.xlsx]

## Sheet: Experiment 1
SEQ_ID	gene_name	Fold change	DESCRIPTION
XM_928211	LOC653580	1.179 down	similar to sperm protein associated with the nucleus, X chromosome, family member A1
XM_928210	LOC645176	1.192 up	hypothetical protein LOC645176
XM_928207	LOC653579	1.072 up	similar to polycythemia rubra vera 1
XM_928205	LOC653257	1.082 down	similar to Gamma-glutamyltranspeptidase 1 precursor (Gamma-glutamyltransferase 1) (CD224 antigen)
XM_928203	LOC645167	1.023 down	hypothetical protein LOC645167
XM_928202	LOC645165	1.080 down	hypothetical protein LOC645165
XM_928201	LOC645164	1.042 down	hypothetical protein LOC645164
XM_928199	LOC400581	1.057 down	GRB2-related adaptor protein-like
XM_928198	LOC645161	1.015 up	similar to 60S ribosomal protein L12
XM_928197	LOC643433	1.195 down	similar to 60S ribosomal protein L29 (Cell surface heparin binding protein HIP)
XM_928195	LOC645159	1.028 up	similar to myeloid/lymphoid or mixed-lineage leukemia 3 isoform 2
XM_928193	LOC284116	1.061 down	hypothetical protein LOC284116
XM_928191	LOC645156	1.441 up	hypothetical protein LOC645156
XM_928189	LOC653577	1.380 up	similar to hypothetical protein FLJ36492
XM_928186	LOC645153	1.002 up	similar to T-box 1 isoform C
XM_928185	LOC645152	1.110 down	similar to T-box 1 isoform C
XM_928184	LOC645151	1.641 up	similar to KIAA0565 gene product
XM_928180	LOC643284	1.050 down	similar to 40S ribosomal protein S29
XM_928177	LOC645146	1.065 down	similar to Kinase suppressor of ras-1 (Kinase suppressor of ras)
XM_928176	LOC645145	1.617 up	similar to Zinc finger BED domain containing protein 1 (dREF homolog) (Putative Ac-like transposable element)
XM_928175	LOC645143	1.213 down	similar to zinc finger protein 286
XM_928170	LOC132707	1.126 up	similar to Zinc finger BED domain containing protein 1 (dREF homolog) (Putative Ac-like transposable element)
XM_928169	LOC645139	1.128 down	similar to poly(A) binding protein interacting protein 1 isoform 1
XM_928168	LOC645138	1.178 up	similar to ribosomal protein S11
XM_928165	LOC645136	1.024 down	similar to L-myc-1 proto-oncogene protein
XM_928163	LOC645134	1.176 down	hypothetical protein LOC645134
XM_928158	LOC645126	1.633 up	similar to profilin 1
XM_928156	LOC643509	1.921 down	similar to Dihydrofolate reductase
XM_928155	LOC645124	1.194 up	similar to hypothetical protein MGC13005
XM_928154	LOC645123	1.185 down	hypothetical protein LOC645123
XM_928152	FLJ16793	1.242 up	similar to cyclin I
XM_928150	LOC645119	1.105 up	similar to hypothetical gene supported by AK125149
XM_928149	LOC645118	1.021 up	similar to microtubule associated serine/threonine kinase 2
XM_928146	LOC653570	1.110 down	similar to tubulin tyrosine ligase
XM_928145	LOC645111	2.000 down	similar to START domain containing 9
XM_928142	LOC645106	1.695 down	similar to kinesin-like motor protein C20orf23
XM_928141	LOC653569	1.095 up	similar to coiled-coil-helix-coiled-coil-helix domain containing 7
XM_928140	LOC645104	1.082 down	similar to Usher syndrome 3A homolog isoform 1
XM_928138	LOC645102	1.016 down	hypothetical protein LOC645102
XM_928136	LOC645100	1.105 down	similar to CG11699-PA
XM_928135	TMPRSS7	1.002 up	transmembrane protease, serine 7
XM_928134	LOC653568	1.245 up	similar to cerebellar degeneration-related protein 1, 34kDa
XM_928133	LOC645098	1.070 down	hypothetical protein LOC645098
XM_928130	LOC645095	1.125 down	similar to Cytochrome c oxidase polypeptide VIc-2
XM_928128	LOC643431	1.718 up	similar to Keratin, type II cytoskeletal 8 (Cytokeratin-8) (CK-8) (Keraton-8) (K8)
XM_928125	LOC645086	1.138 down	similar to small acidic protein
XM_928123	LOC645084	1.865 down	similar to activator of S phase kinase
XM_928122	FLJ41309	1.068 up	hypothetical protein LOC645079
XM_928121	FLJ45231	1.072 down	hypothetical protein LOC645078
XM_928119	LOC645076	1.069 down	similar to gamma-glutamyltransferase-like activity 1
XM_928118	LOC645075	1.167 down	hypothetical protein LOC645075
XM_928117	LOC645074	6.006 up	similar to Keratin, type I cytoskeletal 16 (Cytokeratin-16) (CK-16) (Keratin-16) (K16)
XM_928116	LOC653564	1.113 up	similar to EGFR-coamplified and overexpressed protein
XM_928115	LOC643430	1.021 up	similar to Endoplasmin precursor (94 kDa glucose-regulated protein) (GRP94) (gp96 homolog) (Tumor rejection antigen 1)
XM_928114	LOC653252	1.130 down	similar to Mitochondrial import inner membrane translocase subunit Tim23
XM_928113	LOC645067	3.034 up	hypothetical protein LOC645067
XM_928112	LOC392269	11.934 down	similar to Transcription factor SOX-2
XM_928111	LOC653563	1.055 down	similar to leucine rich repeat containing 29
XM_928110	LOC645064	2.863 down	similar to zinc finger protein 135 (clone pHZ-17)
XM_928109	LOC645063	1.056 up	hypothetical protein LOC645063
XM_928108	LOC645062	1.040 down	hypothetical protein LOC645062
XM_928107	LOC645057	1.017 up	similar to Major urinary protein 5 precursor (MUP 5)
XM_928103	LOC645052	1.459 up	similar to poly (ADP-ribose) polymerase family, member 8
XM_928102	LOC653560	1.186 down	similar to cytokine receptor-like factor 2 isoform 1
XM_928099	LOC645044	1.001 up	similar to T-box 1 isoform C
XM_928097	LOC138971	1.038 up	similar to dipeptidylpeptidase III isoform 1
XM_928095	LOC645039	2.364 down	similar to Cadherin EGF LAG seven-pass G-type receptor 1 precursor (Flamingo homolog 2) (hFmi2)
XM_928094	LOC441734	1.161 down	similar to hypothetical protein DKFZp434I1020
XM_928091	FLJ37673	1.022 down	hypothetical protein FLJ37673
XM_928090	LOC645033	1.606 up	similar to zinc finger homeobox 1b
XM_928089	LOC645032	1.071 up	hypothetical protein LOC645032
XM_928088	LOC645029	1.145 down	similar to Prolyl 4-hydroxylase alpha-2 subunit precursor (4-PH alpha-2) (Procollagen-proline,2-oxoglutarate-4-dioxygenase alpha-2 subunit)
XM_928085	LOC645026	1.508 up	similar to phosphodiesterase 4D interacting protein isoform 1
XM_928083	LOC442077	1.069 up	similar to Retinoic acid receptor beta (RAR-beta) (RAR-epsilon) (HBV-activated protein)
XM_928081	LOC645022	1.101 up	hypothetical protein LOC645022
XM_928077	LOC645015	1.796 down	similar to beta-1,4-mannosyltransferase
XM_928076	LOC645014	1.268 up	similar to hypothetical protein FLJ31401
XM_928075	LOC643287	1.427 down	similar to prothymosin, alpha (gene sequence 28)
XM_928074	LOC645012	1.117 up	similar to SET domain and mariner transposase fusion gene
XM_928068	LOC645001	1.203 down	similar to Heterogeneous nuclear ribonucleoprotein A1 (Helix-destabilizing protein) (Single-strand binding protein) (hnRNP core protein A1) (HDP-1) (Topoisomerase-inhibitor suppressed)
XM_928066	MGC14425	1.190 up	hypothetical protein MGC14425
XM_928065	LOC644997	1.027 up	similar to Serine/threonine-protein kinase Nek4 (NimA-related protein kinase 4) (Serine/threonine-protein kinase 2) (Serine/threonine-protein kinase NRK2)
XM_928063	LOC644995	1.292 down	similar to radical S-adenosyl methionine and flavodoxin domains 1
XM_928062	LOC644994	1.124 up	hypothetical protein LOC644994
XM_928061	LOC653559	1.055 up	similar to Rho-associated protein kinase 1 (Rho-associated, coiled-coil containing protein kinase 1) (p160 ROCK-1) (p160ROCK)
XM_928058	LOC644989	1.018 up	hypothetical protein LOC644989
XM_928056	LOC644986	1.011 up	similar to lipoxygenase homology domains 1
XM_928052	LOC644980	3.573 up	hypothetical protein LOC644980
XM_928051	LOC644979	1.179 down	hypothetical protein LOC644979
XM_928047	LOC644969	1.209 down	similar to Ubiquinol-cytochrome c reductase complex 14 kDa protein (Complex III subunit VI) (QP-C)
XM_928046	LOC653554	1.057 down	similar to acyl-CoA synthetase long-chain family member 6
XM_928045	LOC644968	1.197 up	hypothetical protein LOC644968
XM_928044	LOC644967	1.107 up	similar to putative scaffolding protein POSH
XM_928041	LOC644964	1.282 up	hypothetical protein LOC644964
XM_928038	LOC644958	1.030 up	similar to CG6405-PA
XM_928037	LOC644957	1.028 down	hypothetical protein LOC644957
XM_928035	LOC644951	1.003 up	hypothetical protein LOC644951
XM_928034	LOC644950	1.216 down	similar to H3 histone, family 3B
XM_928033	LOC644948	1.071 up	similar to butyrophilin related 1
XM_928032	LOC644944	1.000 down	hypothetical protein LOC644944
XM_928030	LOC644943	1.045 down	similar to peptidylglycine alpha-amidating monooxygenase COOH-terminal interactor
XM_928029	LOC644942	1.543 up	similar to ring finger protein 187
XM_928028	LOC644941	1.000 up	similar to fatty acid amide hydrolase
XM_928025	LOC644937	1.082 down	similar to 60S ribosomal protein L10 (QM protein) (Tumor suppressor QM) (Laminin receptor homolog)
XM_928022	LOC644935	1.074 up	similar to E74-like factor 2 (ets domain transcription factor) isoform 1
XM_928021	LOC643090	1.025 up	hypothetical protein LOC643090
XM_928017	LOC644929	1.026 up	hypothetical protein LOC644929
XM_928011	LOC643722	1.614 up	similar to Poliovirus receptor related protein 2 precursor (Herpes virus entry mediator B) (HveB) (Nectin 2) (CD112 antigen)
XM_928009	LOC644921	1.112 down	hypothetical protein LOC644921
XM_928007	LOC644920	1.023 down	hypothetical protein LOC644920
XM_928006	LOC644919	1.203 up	hypothetical protein LOC644919
XM_928004	LOC644917	1.016 up	similar to T-box 1 isoform C
XM_927999	LOC653542	1.031 down	similar to dual-specificity tyrosine-(Y)-phosphorylation regulated kinase 1A
XM_927997	LOC643338	1.105 up	hypothetical protein LOC643338
XM_927996	LOC653541	2.028 down	similar to double homeobox 4c
XM_927992	LOC644908	1.158 down	hypothetical protein LOC644908
XM_927988	FLJ38668	1.322 up	similar to hypothetical protein MGC10701
XM_927986	LOC644900	1.184 down	similar to X antigen family, member 5
XM_927985	LOC644899	1.312 down	similar to Telomeric repeat binding factor 2 interacting protein 1 (TRF2-interacting telomeric protein Rap1) (hRap1)
XM_927984	LOC644897	1.084 down	hypothetical protein LOC644897
XM_927980	LOC643319	2.569 up	similar to Transgelin-2
XM_927979	LOC642918	1.017 up	hypothetical protein LOC642917
XM_927978	LOC644893	1.020 up	hypothetical protein LOC644893
XM_927975	LOC644890	1.088 up	similar to Meiosis expressed protein 1
XM_927974	LOC145814	1.000 down	hypothetical protein LOC145814
XM_927973	LOC644888	1.116 down	hypothetical protein LOC644888
XM_927972	LOC644887	1.608 up	hypothetical protein LOC644887
XM_927971	LOC644884	1.628 down	hypothetical protein LOC644884
XM_927970	LOC644883	1.642 down	hypothetical protein LOC644883
XM_927968	CECR7	1.182 down	cat eye syndrome chromosome region, candidate 7
XM_927967	LOC338805	1.041 up	similar to heat shock 70kD protein binding protein
XM_927964	LOC644872	1.103 down	hypothetical protein LOC644872
XM_927961	GAB4	1.045 down	GRB2-associated binding protein family, member 4
XM_927960	LOC644867	1.007 up	hypothetical protein LOC644867
XM_927957	LOC644865	1.346 up	hypothetical protein LOC644865
XM_927955	LOC644863	1.089 up	similar to signal recognition particle 14kDa (homologous Alu RNA binding protein)
XM_927954	LOC644862	1.024 down	similar to 40S ribosomal protein S28
XM_927952	LOC442258	1.027 down	similar to Elongation factor 1-delta (EF-1-delta) (Antigen NY-CO-4)
XM_927950	LOC653536	1.376 down	similar to ST6 beta-galactosamide alpha-2,6-sialyltranferase 2
XM_927948	LOC644856	1.065 up	similar to XAGE-3 protein
XM_927945	LOC644853	1.437 down	hypothetical protein LOC644853
XM_927940	LOC644845	1.032 down	similar to N-acetylated-alpha-linked acidic dipeptidase II (NAALADase II)
XM_927939	LOC644844	1.111 down	hypothetical protein LOC644844
XM_927938	LOC644843	1.067 up	hypothetical protein LOC644843
XM_927934	CYS1	1.172 up	cystin 1
XM_927932	LOC644836	1.064 up	hypothetical protein LOC644836
XM_927931	LOC644835	1.049 down	similar to ProSAPiP2 protein
XM_927928	LOC644832	1.181 down	similar to SET domain and mariner transposase fusion gene
XM_927926	LOC644830	1.223 down	hypothetical protein LOC644830
XM_927925	LOC644826	1.103 up	hypothetical protein LOC644826
XM_927923	LOC441548	1.142 up	similar to BTB (POZ) domain containing 7
XM_927922	LOC653840	1.047 up	similar to Neutrophil cytosol factor 1 (NCF-1) (Neutrophil NADPH oxidase factor 1) (47 kDa neutrophil oxidase factor) (p47-phox) (NCF-47K) (47 kDa autosomal chronic granulomatous disease protein) (NOXO2)
XM_927921	LOC653533	1.610 down	similar to anaphase promoting complex subunit 1
XM_927919	DKFZP686M0199	1.743 down	similar to TFIIH basal transcription factor complex p44 subunit (Basic transcription factor 2 44 kDa subunit) (BTF2-p44) (General transcription factor IIH polypeptide 2)
XM_927914	LOC644816	1.013 down	similar to Heat shock protein HSP 90-beta (HSP 84) (Tumor-specific transplantation 84 kDa antigen) (TSTA)
XM_927913	LOC653532	1.459 down	similar to anaphase promoting complex subunit 1
XM_927910	LOC653528	14.649 down	similar to Teratocarcinoma-derived growth factor 2 (Epidermal growth factor-like cripto protein CR3) (Cripto-3 growth factor)
XM_927909	LOC644813	1.731 down	similar to Cip1-interacting zinc finger protein (Nuclear protein NP94)
XM_927904	LOC644808	1.003 down	similar to 40S ribosomal protein S2
XM_927903	LOC339047	1.334 down	hypothetical protein LOC339047
XM_927901	LOC644806	1.005 down	hypothetical protein LOC644806
XM_927900	LOC653527	1.065 up	similar to Ovarian cancer-related protein 10-2 (OVC10-2)
XM_927899	LOC149478	3.226 up	hypothetical protein LOC149478
XM_927898	LOC644803	1.062 down	hypothetical protein LOC644803
XM_927897	LOC644802	1.047 down	hypothetical protein LOC644802
XM_927895	LOC644800	1.133 down	similar to golgin-67
XM_927891	LOC644794	1.209 up	hypothetical protein LOC644794
XM_927888	LOC644791	1.033 up	hypothetical protein LOC644791
XM_927887	LOC644790	1.092 down	similar to ribosomal protein S15a
XM_927886	LOC643366	1.529 down	similar to ADP-ribosylation factor-like protein 4A
XM_927884	LOC653522	1.045 up	similar to hypothetical protein FLJ22679
XM_927883	LOC644787	1.426 down	hypothetical protein LOC644787
XM_927881	LOC644785	1.013 up	similar to T-box 1 isoform C
XM_927880	LOC644784	1.147 up	similar to Phosphatidylinositol-4,5-bisphosphate 3-kinase catalytic subunit, alpha isoform (PI3-kinase p110 subunit alpha) (PtdIns-3-kinase p110) (PI3K)
XM_927879	LOC643689	1.220 down	similar to heterogeneous nuclear ribonucleoprotein A3
XM_927869	LOC653519	1.039 up	similar to G protein-coupled receptor 89
XM_927861	LOC644764	1.094 up	similar to microsomal NAD+-dependent retinol dehydrogenase 4
XM_927860	LOC644763	1.069 up	similar to erythrocyte membrane protein band 4.1 like 4B isoform 2
XM_927859	LOC643102	1.341 down	similar to kelch-like 12
XM_927858	LOC653516	1.032 down	similar to IQ motif and Sec7 domain 3
XM_927856	LOC644758	1.463 down	similar to poly(A) binding protein, cytoplasmic 1
XM_927854	FLJ36951	1.521 down	similar to eukaryotic translation initiation factor 4e 1a
XM_927851	LOC644752	1.029 up	hypothetical protein LOC644752
XM_927850	LOC653203	1.469 down	similar to hypothetical gene supported by BC039313
XM_927848	LOC653515	1.145 down	similar to cancer/testis antigen CT45
XM_927847	LOC644748	1.530 down	hypothetical protein LOC644748
XM_927843	LOC653514	1.087 up	similar to PDZ domain containing 7
XM_927842	LOC644744	1.050 down	similar to zinc finger protein 11B
XM_927840	LOC642981	1.890 down	hypothetical protein LOC642981
XM_927837	MGC15634	1.265 down	hypothetical protein MGC15634
XM_927836	LOC493754	1.127 down	RAB guanine nucleotide exchange factor (GEF) 1 pseudogene
XM_927835	LOC644736	1.086 up	hypothetical protein LOC644736
XM_927834	LOC644735	1.043 up	similar to Puromycin-sensitive aminopeptidase (PSA)
XM_927832	LOC644733	1.067 down	hypothetical protein LOC644733
XM_927829	LOC644731	1.043 down	similar to Ig kappa chain V-I region HK101 precursor
XM_927827	LOC390211	1.192 up	similar to Keratin, type II cytoskeletal 8 (Cytokeratin-8) (CK-8) (Keraton-8) (K8)
XM_927826	LOC653513	1.306 up	similar to phosphodiesterase 4D interacting protein isoform 2
XM_927825	C6orf160	1.857 down	chromosome 6 open reading frame 160
XM_927822	LOC644726	1.286 down	similar to General transcription factor II-I repeat domain-containing protein 1 (GTF2I repeat domain containing protein 1) (Muscle TFII-I repeat domain-containing protein 1) (General transcription factor III) (Slow-muscle-fiber enhancer binding pro...
XM_927821	LOC644725	1.044 up	similar to Gamma-tubulin complex component 3 (GCP-3) (Spindle pole body protein Spc98 homolog) (hSpc98) (hGCP3) (h104p)
XM_927815	LOC644719	1.008 up	hypothetical protein LOC644719
XM_927814	C1orf152	1.588 up	chromosome 1 open reading frame 152
XM_927812	LOC644717	1.005 up	similar to sarcoma antigen 1
XM_927805	LOC644711	1.075 down	similar to formin 2
XM_927802	LOC644707	1.042 down	hypothetical protein LOC644707
XM_927798	LOC644704	1.028 down	similar to Ig kappa chain V-I region HK101 precursor
XM_927795	LOC644700	1.090 up	similar to Ubiquitin-like protein FUBI
XM_927786	GTF2IP1	1.068 down	general transcription factor II, i, pseudogene 1
XM_927785	FLJ26056	1.162 down	hypothetical protein LOC375127
XM_927783	LOC644683	1.046 down	hypothetical protein LOC644683
XM_927782	LOC644682	1.047 down	similar to centaurin, gamma 2 isoform 1
XM_927781	LOC644681	1.163 down	similar to synovial sarcoma, X breakpoint 2 interacting protein
XM_927780	LOC644679	1.319 down	similar to SET domain and mariner transposase fusion gene
XM_927777	LOC644672	1.028 down	similar to Claudin-22
XM_927776	LOC643426	1.024 down	similar to CCR4-NOT transcription complex subunit 7 (CCR4-associated factor 1) (CAF1)
XM_927774	LOC644669	1.295 down	similar to RIKEN cDNA 4930532L20
XM_927773	LOC644668	1.022 down	hypothetical protein LOC644668
XM_927771	LOC644666	1.170 down	hypothetical protein LOC644666
XM_927767	LOC653505	1.271 down	similar to peptidylprolyl isomerase A (cyclophilin A)-like 4
XM_927766	LOC643577	1.353 up	hypothetical protein LOC643577
XM_927762	LOC644656	1.098 down	hypothetical protein LOC644656
XM_927761	LOC644655	1.428 up	similar to poly (ADP-ribose) polymerase family, member 8
XM_927759	ATP9A	1.253 up	ATPase, Class II, type 9A
XM_927755	LOC644647	1.053 up	hypothetical protein LOC644647
XM_927753	LOC644646	1.068 down	similar to CG14446-PA
XM_927749	LOC644640	1.319 down	similar to N-acetylated-alpha-linked acidic dipeptidase II (NAALADase II)
XM_927744	LOC391799	1.028 up	similar to spermine synthase
XM_927740	LOC644626	1.061 up	similar to neuroblastoma breakpoint family, member 10
XM_927739	LOC644621	1.007 down	similar to Protein CXorf48 (Tumor antigen BJ-HCC-20)
XM_927735	LOC644617	1.002 down	hypothetical protein LOC644617
XM_927732	MGC18216	1.674 up	hypothetical protein MGC18216
XM_927730	LOC644615	1.139 down	similar to Ras-related protein Rab-13
XM_927729	LOC644614	1.669 up	similar to SLIT-ROBO Rho GTPase-activating protein 2 (srGAP2) (Formin-binding protein 2)
XM_927728	LOC644613	1.138 down	hypothetical protein LOC644613
XM_927727	LOC644612	1.263 up	hypothetical protein LOC644612
XM_927726	LOC644611	1.003 down	hypothetical protein LOC644611
XM_927724	LOC653495	1.188 down	similar to synovial sarcoma, X breakpoint 3 isoform a
XM_927722	LOC644608	1.180 down	similar to actin-like protein
XM_927719	LOC644607	1.005 up	hypothetical protein LOC644607
XM_927717	LOC644605	1.902 up	hypothetical protein LOC644605
XM_927716	LOC644602	1.015 up	hypothetical protein LOC644602
XM_927713	LOC644599	1.101 up	hypothetical protein LOC644599
XM_927712	LOC440104	1.145 up	similar to RIKEN cDNA 1110012D08
XM_927711	LOC644598	1.007 up	hypothetical protein LOC644598
XM_927710	LOC644596	1.666 down	hypothetical protein LOC644596
XM_927709	LOC653491	1.194 down	similar to CG12113-PA
XM_927707	LOC644592	1.133 down	similar to Ankyrin-2 (Brain ankyrin) (Ankyrin B) (Ankyrin, nonerythroid)
XM_927706	LOC644591	1.325 down	similar to peptidylprolyl isomerase A (cyclophilin A)-like 4
XM_927705	LOC644590	1.683 up	similar to EVIN1
XM_927702	LOC644586	1.670 down	similar to Kinase suppressor of ras-1 (Kinase suppressor of ras)
XM_927700	LOC644584	1.024 down	similar to RNA-binding protein EWS
XM_927695	LOC644579	1.164 down	hypothetical protein LOC644579
XM_927694	LOC644578	1.210 down	similar to La ribonucleoprotein domain family member 2 isoform 2
XM_927693	LOC642962	1.340 up	hypothetical protein LOC642962
XM_927691	LOC285359	1.152 down	phosducin-like 3 pseudogene
XM_927689	LOC644574	1.028 up	similar to A-kinase anchor protein 150 (AKAP 150) (cAMP-dependent protein kinase regulatory subunit II high affinity binding protein) (P150)
XM_927687	LOC644573	1.094 up	similar to cytochrome P450, family 2, subfamily c, polypeptide 44 isoform 1
XM_927678	LOC653160	1.175 up	Hypothetical protein LOC653160
XM_927676	LOC644556	1.034 up	similar to Exocyst complex component Sec10 (hSec10)
XM_927675	LOC644555	1.098 down	similar to Ribosome biogenesis protein BMS1 homolog
XM_927671	ANKRD31	1.072 down	ankyrin repeat domain 31
XM_927670	LOC644548	1.028 up	similar to Exocyst complex component Sec10 (hSec10)
XM_927666	LOC644544	1.117 up	hypothetical protein LOC644544
XM_927664	LOC644540	1.066 down	similar to transcription elongation factor B (SIII), polypeptide 1
XM_927663	LOC644539	2.131 down	similar to sorting nexin associated golgi protein 1
XM_927661	LOC644538	1.071 down	hypothetical protein LOC644538
XM_927658	LOC644530	1.846 down	hypothetical protein LOC644530
XM_927655	LOC644527	1.127 down	similar to peroxidasin
XM_927654	LOC644525	1.069 down	hypothetical protein LOC644525
XM_927653	LOC644524	1.014 up	similar to Homeobox protein Nkx-2.4 (Homeobox protein NKX2.4) (Homeobox protein NK-2 homolog D)
XM_927647	PRDM6	1.021 down	PR domain containing 6
XM_927645	LOC644516	1.094 down	similar to TBC1 domain family, member 3
XM_927638	LOC653485	1.336 down	similar to potassium channel, subfamily K, member 4
XM_927637	LOC643136	1.119 up	similar to Zinc finger CCCH-type domain containing protein 11A
XM_927635	LOC644508	1.059 up	similar to phosphoglucomutase 5
XM_927634	LOC644507	1.020 up	similar to SET domain and mariner transposase fusion gene
XM_927633	LOC644506	1.100 up	similar to sulfatase modifying factor 2
XM_927629	LOC644504	1.054 up	similar to chondroitin beta1,4 N-acetylgalactosaminyltransferase 2
XM_927625	LOC644499	1.088 down	similar to 60S ribosomal protein L39
XM_927624	LOC644498	1.530 down	similar to Nonhistone chromosomal protein HMG-17 (High-mobility group nucleosome binding domain 2)
XM_927619	LOC441241	1.092 down	chaperonin containing TCP1, subunit 6A (zeta 1)-like
XM_927618	LOC644491	1.326 down	similar to NMDA receptor regulated 2 isoform a
XM_927616	LOC644488	1.398 down	hypothetical protein LOC644488
XM_927614	LOC653483	1.164 up	similar to myeloid/lymphoid or mixed-lineage leukemia (trithorax homolog, Drosophila); translocated to, 4
XM_927613	FLJ43706	1.090 up	hypothetical protein LOC644484
XM_927612	LOC644482	1.250 down	similar to NADH dehydrogenase (ubiquinone) 1 alpha subcomplex, 3, 9kDa
XM_927610	LOC644479	1.271 down	hypothetical protein LOC644479
XM_927609	LOC221710	1.043 down	hypothetical protein LOC221710
XM_927605	LOC643834	1.087 down	similar to Pepsin A precursor
XM_927596	LOC643009	1.112 down	similar to gamma-glutamyltransferase 2
XM_927594	LOC653481	1.036 down	similar to chromosome 6 open reading frame 123
XM_927592	LOC644452	1.089 up	similar to dynein, axonemal, heavy polypeptide 11
XM_927590	LOC644450	1.086 down	hypothetical protein LOC644450
XM_927587	LOC644447	1.033 down	similar to XAGE-3 protein
XM_927585	LOC644445	1.017 up	similar to proline-rich proteoglycan 2
XM_927584	LOC644444	1.058 up	similar to transmembrane protein 30A
XM_927579	LOC644436	1.072 down	similar to Tubulin alpha-4 chain (Alpha-tubulin 4) (Alpha-tubulin isotype M-alpha-4)
XM_927577	LOC644434	1.225 down	hypothetical protein LOC644434
XM_927576	LOC644433	1.709 down	hypothetical protein LOC644433
XM_927572	LOC644427	1.099 down	hypothetical protein LOC644427
XM_927570	LOC653184	1.220 down	similar to hypothetical protein LOC375127
XM_927568	LOC644420	1.001 down	hypothetical protein LOC644420
XM_927567	LOC653477	1.701 down	similar to CG3835-PA, isoform A
XM_927564	LOC441581	1.166 down	similar to FSHD region gene 2 protein
XM_927560	LOC644414	1.427 down	similar to Beta-defensin 131 precursor (Beta-defensin 31) (DEFB-31)
XM_927557	LOC644412	1.005 down	similar to Sodium/hydrogen exchanger 3 (Na(+)/H(+) exchanger 3) (NHE-3) (Solute carrier family 9 member 3)
XM_927556	LOC375010	1.660 down	hypothetical LOC375010
XM_927555	LOC653232	1.175 down	similar to ribosomal protein L15
XM_927553	LOC644408	1.032 down	hypothetical protein LOC644408
XM_927552	LOC644407	1.134 down	similar to Beta-defensin 108B precursor (Defensin, beta 108B) (Defensin, beta 108) (Beta-defensin 8) (DEFB-8) (BD-8) (hBD-8)
XM_927549	LOC126520	1.115 down	hypothetical protein LOC126520
XM_927548	LOC644402	1.040 down	hypothetical protein LOC644402
XM_927547	LOC653473	1.507 down	similar to Zinc finger protein 588 (Zinc finger protein ZFD25)
XM_927546	LOC644401	1.143 down	hypothetical protein LOC644401
XM_927540	LOC644394	1.133 down	similar to Mitochondrial import inner membrane translocase subunit TIM8 B (Deafness dystonia protein 2) (DDP-like protein)
XM_927539	LOC644393	1.026 up	hypothetical protein LOC644393
XM_927536	ALDH1L2	2.554 up	aldehyde dehydrogenase 1 family, member L2
XM_927535	C11orf34	1.826 up	chromosome 11 open reading frame 34
XM_927534	LOC644389	1.303 up	similar to dynein, axonemal, heavy polypeptide 1
XM_927531	LOC644383	1.448 down	similar to Heat shock factor protein 2 (HSF 2) (Heat shock transcription factor 2) (HSTF 2)
XM_927530	LOC653469	1.030 up	hypothetical protein LOC653469
XM_927529	LOC644378	1.253 up	similar to glucosaminyl (N-acetyl) transferase 2 isoform C
XM_927527	LOC644374	1.640 up	similar to CG7092-PA
XM_927522	LOC619207	1.093 up	scavenger receptor protein family member
XM_927521	LOC389965	1.070 up	similar to Sodium/hydrogen exchanger 3 (Na(+)/H(+) exchanger 3) (NHE-3) (Solute carrier family 9 member 3)
XM_927520	RP11-328N1.1	1.318 up	similar to CG7092-PA
XM_927517	LOC644359	1.113 up	similar to calcium channel, voltage-dependent, L type, alpha 1C subunit
XM_927516	LOC619207	1.007 up	scavenger receptor protein family member
XM_927515	LOC644358	1.012 down	similar to Sodium/hydrogen exchanger 3 (Na(+)/H(+) exchanger 3) (NHE-3) (Solute carrier family 9 member 3)
XM_927514	LOC644357	1.113 up	similar to Elongation factor 1-delta (EF-1-delta) (Antigen NY-CO-4)
XM_927513	LOC644352	2.497 down	similar to opioid binding protein/cell adhesion molecule-like
XM_927512	LOC644351	1.169 down	similar to SET domain and mariner transposase fusion gene
XM_927510	LOC619207	1.075 up	scavenger receptor protein family member
XM_927509	LOC644344	1.089 up	similar to Sodium/hydrogen exchanger 3 (Na(+)/H(+) exchanger 3) (NHE-3) (Solute carrier family 9 member 3)
XM_927508	LOC642970	1.108 up	hypothetical protein LOC642970
XM_927506	LOC644341	1.056 up	hypothetical protein LOC644341
XM_927505	C8orf68	1.262 down	chromosome 8 open reading frame 68
XM_927504	LOC644340	1.494 down	hypothetical protein LOC644340
XM_927502	LOC644338	1.059 down	similar to 60S ribosomal protein L37a
XM_927500	LOC202134	1.186 down	hypothetical protein LOC202134
XM_927499	LOC644336	1.006 up	similar to SET domain and mariner transposase fusion gene
XM_927498	LOC644335	1.069 up	similar to Est1p-like protein B
XM_927497	LOC644334	1.079 up	similar to Band 4.1-like protein 5
XM_927493	LOC644327	1.042 up	similar to W03G1.5
XM_927492	C6orf61	1.289 up	chromosome 6 open reading frame 61
XM_927491	LOC644326	1.119 down	hypothetical protein LOC644326
XM_927490	LOC644325	1.091 down	similar to ADAM 25 precursor (A disintegrin and metalloproteinase domain 25) (Testase 2)
XM_927488	LOC644323	1.899 up	hypothetical protein LOC644323
XM_927487	LOC644319	1.080 up	hypothetical protein LOC644319
XM_927485	LOC644317	1.070 down	hypothetical protein LOC644317
XM_927482	LOC644313	1.029 down	similar to Ral guanine nucleotide dissociation stimulator (RalGEF) (RalGDS)
XM_927481	LOC644312	1.711 up	similar to SLIT-ROBO Rho GTPase-activating protein 2 (srGAP2) (Formin-binding protein 2)
XM_927480	LOC644310	1.030 down	similar to ubiquinol-cytochrome c reductase complex 7.2kDa protein isoform a
XM_927477	LOC644305	1.016 down	similar to Importin-7 (Imp7) (Ran-binding protein 7) (RanBP7)
XM_927475	LOC644303	2.032 up	similar to ATP-dependent RNA helicase DDX24 (DEAD-box protein 24)
XM_927473	LOC284274	1.001 up	hypothetical protein LOC284274
XM_927472	LOC644298	2.572 up	hypothetical protein LOC644298
XM_927471	LOC653456	1.107 up	similar to zinc finger protein 568
XM_927470	LOC644297	1.022 down	similar to Apoptosis-related protein 2 (APR-2)
XM_927468	LOC644295	1.232 down	similar to T25G3.1
XM_927467	LOC644294	1.018 up	hypothetical protein LOC644294
XM_927466	LOC399829	1.037 down	FLJ43861 protein
XM_927465	LOC644293	1.009 down	similar to notch gene homolog 2
XM_927464	LOC653455	1.272 down	similar to deubiquitinating enzyme 3
XM_927462	LOC644288	1.315 down	hypothetical protein LOC644288
XM_927461	GLYCAM1	1.091 down	glycosylation-dependent cell adhesion molecule 1
XM_927460	LOC644284	1.621 down	hypothetical protein LOC644284
XM_927459	LOC644283	1.013 down	hypothetical protein LOC644283
XM_927458	LOC644282	1.315 up	similar to COP9 constitutive photomorphogenic homolog subunit 3
XM_927456	LOC644278	1.037 up	similar to bruno-like 4, RNA binding protein
XM_927455	LOC644276	1.006 up	similar to splicing coactivator subunit SRm300
XM_927454	CEP78	1.212 down	centrosomal protein 78kDa
XM_927452	LOC643169	1.255 up	hypothetical protein LOC643169
XM_927451	LOC653226	1.068 down	similar to Signal recognition particle 9 kDa protein (SRP9)
XM_927448	LOC644273	1.166 down	similar to stella
XM_927445	LOC644268	1.070 up	similar to vomeronasal 1 receptor, a13
XM_927443	LOC644265	1.040 down	similar to F-actin capping protein beta subunit
XM_927442	LOC644264	1.102 down	similar to fetal Alzheimer antigen isoform 2
XM_927435	LOC644255	1.130 down	hypothetical protein LOC644255
XM_927434	LOC441440	1.112 down	hypothetical LOC441440
XM_927433	LOC644253	1.221 down	similar to C-jun-amino-terminal kinase interacting protein 1 (JNK-interacting protein 1) (JIP-1) (JNK MAP kinase scaffold protein 1) (Islet-brain-1) (IB-1) (Mitogen-activated protein kinase 8-interacting protein 1)
XM_927430	LOC644251	1.077 down	similar to serine/arginine repetitive matrix 2
XM_927429	LOC644249	1.637 down	hypothetical protein LOC644249
XM_927427	LOC644246	1.190 up	hypothetical protein LOC644246
XM_927426	LOC644243	1.129 up	similar to general transcription factor II I
XM_927425	LOC644242	1.653 up	hypothetical protein LOC644242
XM_927422	LOC440267	1.121 down	similar to GM88 autoantigen isoform c
XM_927420	LOC653154	1.500 down	similar to brain protein 16
XM_927417	LOC644231	1.834 up	hypothetical protein LOC644231
XM_927416	LOC644230	1.091 up	hypothetical protein LOC644230
XM_927415	LOC644227	1.181 up	similar to nuclease sensitive element binding protein 1
XM_927414	LOC644225	1.021 up	hypothetical protein LOC644225
XM_927413	LOC643412	1.041 down	similar to basic transcription factor 3
XM_927405	LOC653437	1.031 up	similar to aquaporin 12A
XM_927404	LOC401914	1.004 down	similar to C-terminal binding protein 2 isoform 2
XM_927403	LOC644215	1.173 up	hypothetical protein LOC644215
XM_927397	LOC644208	1.009 up	similar to Neuronal acetylcholine receptor protein, beta-4 subunit precursor
XM_927396	LOC644206	1.014 up	hypothetical protein LOC644206
XM_927390	LOC644197	1.063 up	hypothetical protein LOC644197
XM_927389	LOC644196	1.549 down	similar to CG10151-PA, isoform A
XM_927388	LOC644195	1.068 down	similar to Gamma-aminobutyric-acid receptor rho-3 subunit precursor (GABA(A) receptor)
XM_927386	LOC644193	1.045 down	similar to Y51B11A.1
XM_927385	LOC653304	1.457 down	similar to DEAD/H (Asp-Glu-Ala-Asp/His) box polypeptide 26
XM_927384	LOC642947	1.039 down	hypothetical protein LOC642947
XM_927381	C6orf189	1.030 down	chromosome 6 open reading frame 189
XM_927380	LOC644186	1.014 up	hypothetical protein LOC644186
XM_927374	LOC644175	1.061 down	hypothetical protein LOC644175
XM_927372	LOC644172	1.181 down	similar to C-jun-amino-terminal kinase interacting protein 1 (JNK-interacting protein 1) (JIP-1) (JNK MAP kinase scaffold protein 1) (Islet-brain-1) (IB-1) (Mitogen-activated protein kinase 8-interacting protein 1)
XM_927369	LOC644168	1.040 up	similar to paired related homeobox protein-like 1
XM_927368	LOC653428	1.304 up	similar to BTB (POZ) domain containing 14A
XM_927367	KIAA1833	1.551 up	hypothetical protein KIAA1833
XM_927362	LOC644154	1.078 up	similar to ribosomal protein L10a
XM_927360	LOC644152	1.078 up	similar to CG32774-PA
XM_927359	LOC644151	1.182 up	similar to calpain 8
XM_927357	LOC644147	2.230 up	hypothetical protein LOC644147
XM_927355	LOC644145	1.044 down	similar to Exocyst complex component Sec3
XM_927354	LOC644144	1.255 down	similar to ADP-ribosylation factor 7
XM_927351	LOC644139	1.093 down	hypothetical protein LOC644139
XM_927349	CNGA4	1.014 up	cyclic nucleotide gated channel alpha 4
XM_927347	LOC644136	1.020 down	hypothetical protein LOC644136
XM_927346	LOC644133	1.134 down	similar to Apoptosis-related protein 2 (APR-2)
XM_927344	FLJ45055	1.815 up	hypothetical protein LOC644128
XM_927341	LOC644120	1.128 down	hypothetical protein LOC644120
XM_927336	LOC644113	1.228 up	hypothetical protein LOC644113
XM_927335	LOC644112	1.047 down	similar to splicing factor 3b, subunit 4
XM_927334	LOC644109	1.091 up	similar to 40S ribosomal protein SA (p40) (34/67 kDa laminin receptor) (Colon carcinoma laminin-binding protein) (NEM/1CHD4) (Multidrug resistance-associated protein MGr1-Ag)
XM_927329	LOC644102	1.029 up	hypothetical protein LOC644102
XM_927327	LOC644100	1.172 down	similar to CG14464-PA.3
XM_927326	MLC1	1.019 up	megalencephalic leukoencephalopathy with subcortical cysts 1
XM_927325	LOC644099	1.019 down	similar to ovo-like 2 isoform A
XM_927324	LOC644097	1.014 down	hypothetical protein LOC644097
XM_927323	LOC644096	1.088 down	hypothetical protein LOC644096
XM_927322	LOC644095	1.170 down	hypothetical protein LOC644095
XM_927321	LOC643035	1.105 up	similar to CG33096-PB, isoform B
XM_927320	LOC644091	1.309 up	similar to microtubule associated serine/threonine kinase 2
XM_927318	LOC644088	1.094 up	similar to K08H10.2a
XM_927317	LOC644087	1.059 down	similar to tyrosine hydroxylase 2
XM_927313	LOC644074	1.210 down	similar to RIKEN cDNA 4930532L20
XM_927312	LOC644073	1.073 up	similar to Phosphorylase b kinase gamma catalytic chain, skeletal muscle isoform (Phosphorylase kinase gamma subunit 1)
XM_927306	LOC644066	1.033 down	similar to CG31901-PA
XM_927305	LOC653412	1.447 down	similar to hypothetical protein LOC153561
XM_927301	LOC644059	1.012 down	similar to peptide YY
XM_927300	LOC644057	1.018 down	hypothetical protein LOC644057
XM_927299	LOC644056	1.199 down	similar to Ciliary dynein heavy chain 11 (Axonemal beta dynein heavy chain 11)
XM_927296	LOC644053	1.195 down	hypothetical protein LOC644053
XM_927294	LOC644052	4.041 up	similar to CG31151-PB, isoform B
XM_927291	LOC644048	1.110 down	similar to SET domain and mariner transposase fusion gene
XM_927290	LOC644047	1.017 down	similar to Proline-rich nuclear receptor coactivator 2
XM_927289	LOC340243	1.347 down	similar to solute carrier family 29 (nucleoside transporters), member 4
XM_927288	LOC644044	1.014 down	hypothetical protein LOC644044
XM_927287	LOC644043	1.024 down	similar to cadherin 12, type 2 preproprotein
XM_927285	LOC653410	1.002 down	similar to hypothetical protein BC017947
XM_927282	MMP23A	1.209 up	matrix metallopeptidase 23A
XM_927278	LOC653406	1.456 up	similar to Baculoviral IAP repeat-containing protein 1 (Neuronal apoptosis inhibitory protein)
XM_927277	LOC644031	1.075 down	similar to nucleoporin 210
XM_927276	LOC653405	1.913 down	similar to DEAH (Asp-Glu-Ala-His) box polypeptide 37
XM_927274	FLJ13195	1.051 up	stromal antigen 3-like
XM_927273	LOC643300	1.513 down	similar to 60 kDa heat shock protein, mitochondrial precursor (Hsp60) (60 kDa chaperonin) (CPN60) (Heat shock protein 60) (HSP-60) (Mitochondrial matrix protein P1) (P60 lymphocyte protein) (HuCHA60)
XM_927271	LOC644025	1.062 down	similar to septin 7
XM_927270	LOC653400	1.103 up	similar to Occludin
XM_927269	LOC644024	1.337 down	similar to dynein, axonemal, heavy chain 11
XM_927268	LOC644023	1.095 down	similar to Lysosomal Pro-X carboxypeptidase precursor (Prolylcarboxypeptidase) (PRCP) (Proline carboxypeptidase) (Angiotensinase C) (Lysosomal carboxypeptidase C)
XM_927265	LOC643288	1.464 down	similar to 60 kDa heat shock protein, mitochondrial precursor (Hsp60) (60 kDa chaperonin) (CPN60) (Heat shock protein 60) (HSP-60) (Mitochondrial matrix protein P1) (P60 lymphocyte protein) (HuCHA60)
XM_927260	LOC644011	1.026 up	similar to Glutamate dehydrogenase 1, mitochondrial precursor (GDH) (Memory-related protein 2) (MRG-2)
XM_927259	RP11-38L15.1	1.408 down	similar to family with sequence similarity 35, member A
XM_927258	LOC644005	1.151 down	hypothetical protein LOC644005
XM_927256	LOC644003	1.012 down	similar to Mucin-2 precursor (Intestinal mucin 2)
XM_927253	LOC399761	1.098 up	hypothetical protein LOC399761
XM_927251	LOC643079	1.138 down	hypothetical protein LOC643079
XM_927249	LOC442421	1.087 down	similar to prostaglandin E receptor 4, subtype EP4; PGE receptor, EP4 subtype; prostaglandin E2 receptor
XM_927245	LOC653398	1.006 down	similar to regulatory factor X domain containing 1
XM_927240	LOC643990	1.059 down	similar to T-box 1 isoform C
XM_927238	LOC643988	2.602 down	hypothetical protein LOC643988
XM_927235	LOC643985	1.071 up	hypothetical protein LOC643985
XM_927228	KRTAP7-1	1.042 down	keratin associated protein 7-1
XM_927225	ATP13A3	1.002 down	ATPase type 13A3
XM_927221	LOC643968	1.144 down	hypothetical protein LOC643968
XM_927219	LOC643965	1.025 down	hypothetical protein LOC643965
XM_927217	LOC643961	1.148 up	similar to CG9967-PA, isoform A
XM_927215	AATK	1.298 down	apoptosis-associated tyrosine kinase
XM_927214	LOC643958	1.007 down	hypothetical protein LOC643958
XM_927208	LOC643951	1.020 up	hypothetical protein LOC643951
XM_927207	LOC643949	1.073 down	similar to 60S acidic ribosomal protein P2
XM_927206	LOC643945	1.214 down	similar to septin 7
XM_927203	EBF2	1.094 down	early B-cell factor 2
XM_927200	LOC442128	1.051 up	hypothetical LOC442128
XM_927199	LOC643940	1.174 up	similar to HIG1 domain family member 1A (Hypoxia-inducible gene 1 protein)
XM_927198	LOC643007	1.207 down	similar to large subunit ribosomal protein L36a
XM_927194	LOC643936	1.281 up	hypothetical protein LOC643936
XM_927191	LOC643933	1.186 down	hypothetical protein LOC643933
XM_927190	LOC643036	1.043 up	similar to proteoglycan 3
XM_927187	LOC643926	1.072 down	similar to putative MAPK activating protein PM20,PM21 isoform 2
XM_927185	LOC653384	1.304 down	similar to microtubule associated serine/threonine kinase 2
XM_927182	LOC643922	1.276 down	hypothetical protein LOC643922
XM_927179	LOC643003	1.340 down	similar to 40S ribosomal protein S26
XM_927173	LOC643016	1.070 down	hypothetical protein LOC643016
XM_927171	LOC643906	1.055 down	similar to 60S ribosomal protein L7
XM_927170	LOC643905	1.047 up	similar to protocadherin 15b
XM_927169	LOC643904	1.030 up	hypothetical protein LOC643904
XM_927166	LOC643900	1.147 down	similar to ret finger protein-like 2
XM_927165	LOC642770	1.078 down	similar to 60S ribosomal protein L17 (L23)
XM_927164	LOC643897	1.041 down	similar to cytoplasmic beta-actin
XM_927163	LOC441609	1.164 up	tyrosine 3-monooxygenase/tryptophan 5-monooxygenase activation protein, zeta pseudogene
XM_927161	LOC643680	1.019 down	hypothetical protein
XM_927158	LOC653378	1.219 down	similar to Programmed cell death protein 6 (Probable calcium-binding protein ALG-2)
XM_927154	NXF2	1.198 down	nuclear RNA export factor 2
XM_927152	LOC643884	1.062 down	similar to Cytokine inducible SH2-containing protein 5 (Suppressor of cytokine signaling 5) (SOCS-5) (Cytokine-inducible SH2 protein 6) (CIS-6)
XM_927151	C6orf185	1.133 up	chromosome 6 open reading frame 185
XM_927150	LOC653148	1.095 up	similar to chromosome 15 open reading frame 38
XM_927148	LOC643878	1.046 up	similar to keratin 4
XM_927144	KIAA1430	1.071 up	KIAA1430
XM_927142	LQK1	1.197 down	LQK1 hypothetical protein short isoform
XM_927140	LOC643870	1.032 up	similar to Translationally-controlled tumor protein (TCTP) (p23) (Histamine-releasing factor) (HRF) (Fortilin)
XM_927139	LOC643869	1.136 down	hypothetical protein LOC643869
XM_927138	LOC643868	1.007 up	hypothetical protein LOC643868
XM_927136	LOC643865	1.043 down	similar to Keratin, type II cytoskeletal 2 oral (Cytokeratin-2P) (K2P) (CK 2P)
XM_927130	LOC643857	1.005 down	similar to cadherin 12, type 2 preproprotein
XM_927128	LOC643855	1.099 down	similar to G1 to S phase transition protein 1 homolog (GTP-binding protein GST1-HS)
XM_927125	LOC653371	1.063 up	similar to Baculoviral IAP repeat-containing protein 1 (Neuronal apoptosis inhibitory protein)
XM_927124	LOC643850	1.306 down	hypothetical protein LOC643850
XM_927119	LOC643844	1.052 down	similar to Nuclear pore glycoprotein p62 (62 kDa nucleoporin)
XM_927114	LOC643837	1.428 up	hypothetical protein LOC643837
XM_927113	LOC643832	1.077 down	similar to GAGE-8 protein (G antigen 8)
XM_927112	LOC643831	1.020 up	similar to phosducin-like 3
XM_927109	LOC643828	1.025 up	similar to Glutamate dehydrogenase 1, mitochondrial precursor (GDH) (Memory-related protein 2) (MRG-2)
XM_927106	LOC643825	1.054 down	similar to zinc finger protein 396
XM_927104	LOC642954	1.438 down	similar to retinoblastoma binding protein 4
XM_927103	LOC400652	1.101 down	similar to 40S ribosomal protein S3a
XM_927102	LOC643821	1.005 down	hypothetical protein LOC643821
XM_927101	LOC643820	1.150 down	similar to zinc finger protein 586
XM_927098	FAM87B	1.399 up	family with sequence similarity 87, member B
XM_927095	LOC653368	1.042 down	similar to Green-sensitive opsin (Green cone photoreceptor pigment)
XM_927094	LOC643814	1.050 down	hypothetical protein LOC643814
XM_927093	LOC643812	1.130 down	hypothetical protein LOC643812
XM_927092	LOC643811	1.006 up	similar to FERM domain containing 6
XM_927089	LOC643808	1.082 down	similar to zinc finger protein 420
XM_927087	LOC643805	1.071 down	similar to cis-Golgi matrix protein GM130
XM_927086	RP11-98I6.3	1.216 down	N-acylsphingosine amidohydrolase (non-lysosomal ceramidase) 2C
XM_927081	LOC643801	1.248 down	similar to GM88 autoantigen isoform c
XM_927078	LOC653363	1.023 down	similar to chromosome X open reading frame 2
XM_927077	LOC643798	1.034 down	hypothetical protein LOC643798
XM_927076	LOC643797	1.043 up	hypothetical protein LOC643797
XM_927073	FLJ37512	1.725 down	similar to Contactin-associated protein-like 3 precursor (Cell recognition molecule Caspr3)
XM_927072	LOC653362	1.550 down	similar to zinc finger protein 248
XM_927071	LOC643790	1.023 down	similar to Nonhistone chromosomal protein HMG-14 (High-mobility group nucleosome binding domain 1)
XM_927069	LOC643788	1.072 up	similar to NADH-ubiquinone oxidoreductase chain 2 (NADH dehydrogenase subunit 2)
XM_927066	LOC643784	1.347 up	similar to Baculoviral IAP repeat-containing protein 1 (Neuronal apoptosis inhibitory protein)
XM_927062	LOC643773	1.003 up	similar to intracellular membrane-associated calcium-independent phospholipase A2 gamma
XM_927060	LOC653358	1.215 down	similar to zinc finger protein 181 (HHZ181)
XM_927058	LOC643767	1.029 up	hypothetical protein LOC643767
XM_927050	LOC643760	1.058 down	hypothetical protein LOC643760
XM_927048	LOC220729	1.357 up	similar to Succinate dehydrogenase [ubiquinone] flavoprotein subunit, mitochondrial precursor (Fp) (Flavoprotein subunit of complex II)
XM_927046	LOC643756	1.025 down	hypothetical protein LOC643756
XM_927044	LOC342167	1.158 down	similar to GM88 autoantigen isoform c
XM_927043	LOC643755	1.183 up	hypothetical protein LOC643755
XM_927041	LOC653260	1.572 up	similar to Smooth muscle cell-expressed and macrophage conditioned medium-induced protein 64 (Smag-64)
XM_927039	LOC643748	1.002 up	hypothetical protein LOC643748
XM_927038	LOC643747	1.008 up	hypothetical protein LOC643747
XM_927034	LOC653327	1.596 up	similar to Fatty acid-binding protein, epidermal (E-FABP) (Psoriasis-associated fatty acid-binding protein homolog) (PA-FABP)
XM_927031	LOC643740	1.093 down	hypothetical protein LOC643740
XM_927029	PPP1R3E	1.107 up	protein phosphatase 1, regulatory (inhibitor) subunit 3E
XM_927027	ANTXRL	1.017 up	anthrax toxin receptor-like
XM_927026	LOC440080	1.251 down	similar to cDNA sequence BC048546
XM_927024	LOC653346	1.393 up	similar to similar to RPL23AP7 protein
XM_927022	LOC643734	1.012 down	hypothetical protein LOC643734
XM_927019	LOC643731	1.033 down	similar to protein expressed in T-cells and eosinophils in atopic dermatitis
XM_927014	LOC643720	1.104 down	similar to Protein C21orf109
XM_927013	LOC653345	1.176 down	similar to Olfactory receptor 4F3
XM_927011	FLJ43080	1.163 up	hypothetical protein LOC642986
XM_927009	LOC643713	1.780 up	hypothetical protein LOC643713
XM_927008	LOC643712	1.048 up	similar to Y43F4A.1a
XM_927004	LOC653127	1.410 up	similar to GTPase activating Rap/RanGAP domain-like 4
XM_927001	LOC643702	1.067 down	similar to bromodomain containing 9 isoform 1
XM_926999	LOC643700	1.046 down	hypothetical protein LOC643700
XM_926998	LOC643699	1.173 down	similar to GM88 autoantigen isoform c
XM_926997	LOC643698	1.150 up	hypothetical protein LOC643698
XM_926996	LOC340598	2.302 up	similar to Keratin, type I cytoskeletal 18 (Cytokeratin-18) (CK-18) (Keratin-18) (K18)
XM_926992	LOC643692	1.174 down	hypothetical protein LOC643692
XM_926991	LOC643691	1.121 down	similar to THUMP domain containing 1
XM_926990	LOC643688	1.037 down	hypothetical protein LOC643688
XM_926989	LOC643687	1.274 down	similar to 3-ketoacyl-CoA thiolase, mitochondrial (Beta-ketothiolase) (Acetyl-CoA acyltransferase) (Mitochondrial 3-oxoacyl-CoA thiolase) (T1)
XM_926988	LOC643686	1.113 up	similar to tramdorin 1
XM_926986	LOC653342	3.155 down	similar to Complement C1r subcomponent precursor (Complement component 1, r subcomponent)
XM_926984	LOC653341	1.330 up	similar to 60S ribosomal protein L23a
XM_926981	RP11-556L1.3	1.114 up	PDZ domain containing 5B
XM_926979	LOC643676	1.082 down	similar to Complement C1r subcomponent precursor (Complement component 1, r subcomponent)
XM_926978	LOC643673	1.039 down	hypothetical protein LOC643673
XM_926977	FLJ40176	1.049 down	hypothetical protein FLJ40176
XM_926976	LOC643672	1.098 up	similar to mondoA
XM_926975	LOC643671	1.018 down	hypothetical protein LOC643671
XM_926974	LOC643670	1.138 up	hypothetical protein LOC643670
XM_926970	LOC653338	1.030 down	similar to dipeptidylpeptidase VI isoform 1
XM_926969	LOC643664	1.057 down	similar to acyl-malonyl condensing enzyme 1
XM_926966	LOC653156	1.128 down	similar to 60S ribosomal protein L21
XM_926964	LOC643660	7.026 up	hypothetical protein LOC643660
XM_926962	LOC653121	1.093 up	similar to zinc finger and BTB domain containing 8
XM_926961	LOC643654	1.099 down	hypothetical protein LOC643654
XM_926959	LOC643652	1.389 down	similar to glycine-N-acyltransferase (predicted)
XM_926956	LOC286467	2.476 down	hypothetical protein LOC286467
XM_926955	KIAA0415	1.559 up	KIAA0415 protein
XM_926954	LOC642969	1.210 down	similar to Phosphoglycerate mutase 1 (Phosphoglycerate mutase isozyme B) (PGAM-B) (BPG-dependent PGAM 1)
XM_926953	LOC643648	1.030 down	hypothetical protein LOC643648
XM_926951	LOC643647	1.062 up	similar to CG1530-PA
XM_926946	FLJ14977	2.730 up	similar to Forkhead box protein K1 (Myocyte nuclear factor) (MNF)
XM_926941	LOC643637	1.538 down	similar to glycine-N-acyltransferase (predicted)
XM_926939	LOC643635	1.294 up	similar to DEAD/H (Asp-Glu-Ala-Asp/His) box polypeptide 11 isoform 1
XM_926936	LOC643631	1.031 up	similar to dicer1
XM_926934	LOC133993	1.023 up	hypothetical LOC133993
XM_926933	LOC642834	1.146 down	hypothetical protein LOC642834
XM_926932	LOC643630	1.524 down	hypothetical protein LOC643630
XM_926928	LOC643626	1.196 down	similar to T-box 1 isoform C
XM_926927	LOC643625	1.201 up	hypothetical protein LOC643625
XM_926924	LOC653329	1.469 down	similar to golgi autoantigen, golgin subfamily a-like
XM_926922	LOC206227	1.047 up	similar to B-cell lymphoma 9 protein (Bcl-9) (Legless homolog)
XM_926921	MOP-1	2.161 up	MOP-1
XM_926920	LOC643615	1.001 up	similar to Nucleolar transcription factor 1 (Upstream binding factor 1) (UBF-1)
XM_926919	LOC643614	1.039 up	hypothetical protein LOC643614
XM_926917	C12orf55	none	chromosome 12 open reading frame 55
XM_926913	LOC653328	1.228 down	similar to ribosomal protein S27
XM_926912	LOC643605	1.508 down	similar to CTD (carboxy-terminal domain, RNA polymerase II, polypeptide A) small phosphatase like 2
XM_926911	LOC643604	1.102 down	similar to zinc finger protein 300
XM_926904	LOC642933	1.017 down	hypothetical protein LOC642933
XM_926900	LOC643596	1.065 up	similar to C06A5.8a
XM_926899	LOC643595	1.073 down	similar to solute carrier family 29 (nucleoside transporters), member 4
XM_926898	LOC643594	1.302 down	similar to CG13731-PA
XM_926895	LOC129881	1.212 down	hypothetical LOC129881
XM_926894	LOC643590	1.202 down	hypothetical protein LOC643590
XM_926890	LOC653325	1.025 up	similar to Similar to RIKEN cDNA 2310002J15 gene
XM_926889	LOC643584	1.088 down	similar to SET domain and mariner transposase fusion gene
XM_926888	LOC643583	1.020 up	similar to Kunitz-type protease inhibitor 3 precursor (HKIB9)
XM_926887	LOC643582	1.065 down	similar to aldo-keto reductase family 1, member B10
XM_926886	LOC653324	1.216 down	similar to ATP synthase, H+ transporting, mitochondrial F0 complex, subunit f isoform 2b
XM_926885	LOC643580	1.023 up	similar to Glutamate dehydrogenase 1, mitochondrial precursor (GDH) (Memory-related protein 2) (MRG-2)
XM_926884	LOC653323	1.421 down	similar to tripartite motif protein 32 (predicted)
XM_926879	LOC643575	1.075 down	similar to synovial sarcoma, X breakpoint 6
XM_926873	LOC642611	1.135 down	similar to casein kinase 1, gamma 2
XM_926872	LOC392506	1.048 down	similar to eukaryotic translation elongation factor 1 alpha 2
XM_926871	LOC643570	1.070 up	hypothetical protein LOC643570
XM_926867	LOC643566	1.193 down	hypothetical protein LOC643566
XM_926864	LOC653286	1.077 down	similar to CD99 antigen-like 2
XM_926863	LOC643563	1.009 down	similar to eukaryotic translation elongation factor 1 alpha 2
XM_926859	LOC643559	1.403 down	hypothetical protein LOC643559
XM_926857	LOC643554	1.116 up	similar to Ornithine aminotransferase, mitochondrial precursor (Ornithine--oxo-acid aminotransferase)
XM_926853	LOC643550	1.014 up	similar to 60S ribosomal protein L12
XM_926851	LOC286260	1.088 down	hypothetical protein LOC286260
XM_926850	LOC643545	1.077 down	hypothetical protein LOC643545
XM_926844	LOC643534	1.003 down	similar to Guanine nucleotide-binding protein beta subunit 2-like 1 (Receptor of activated protein kinase C 1) (RACK1) (Receptor for activated C kinase)
XM_926843	LOC643533	1.063 up	hypothetical protein LOC643533
XM_926838	LOC643523	1.227 up	similar to CG32045-PC, isoform C
XM_926836	LOC642701	1.023 up	hypothetical protein LOC642701
XM_926835	LOC653313	1.304 down	similar to paraneoplastic antigen MA3
XM_926834	LOC643520	1.170 up	hypothetical protein LOC643520
XM_926832	LOC643518	1.232 down	similar to Importin alpha-2 subunit (Karyopherin alpha-2 subunit) (SRP1-alpha) (RAG cohort protein 1)
XM_926831	LOC643516	1.402 down	similar to 40S ribosomal protein S26
XM_926830	FAM22A	1.083 up	family with sequence similarity 22, member A
XM_926829	LOC643513	1.186 down	similar to Importin alpha-2 subunit (Karyopherin alpha-2 subunit) (SRP1-alpha) (RAG cohort protein 1)
XM_926826	EPAG	1.140 down	early lymphoid activation protein
XM_926825	LOC643506	1.034 down	hypothetical protein LOC643506
XM_926824	LOC643505	1.090 down	similar to large subunit ribosomal protein L36a
XM_926822	LOC643502	1.057 down	similar to SET domain and mariner transposase fusion gene
XM_926821	LOC643501	1.337 down	similar to Collagen alpha 1(I) chain precursor
XM_926818	LOC121006	1.011 down	hypothetical protein LOC121006
XM_926817	LOC642778	1.042 up	similar to nuclear pore complex interacting protein
XM_926815	LOC643495	1.231 up	hypothetical protein LOC643495
XM_926814	FLJ11903	1.456 up	similar to hypothetical protein MGC40405
XM_926812	LOC643492	1.011 down	hypothetical protein LOC643492
XM_926811	LOC643491	1.163 down	similar to Golgi autoantigen, golgin subfamily A member 2 (Golgi matrix protein GM130)
XM_926809	LOC643078	1.250 down	similar to heterogeneous nuclear ribonucleoprotein K
XM_926805	LOC643483	1.107 down	similar to Erythrocyte band 7 integral membrane protein (Stomatin) (Protein 7.2b)
XM_926804	LOC643481	1.166 down	similar to Rho-GTPase-activating protein 26 (Oligophrenin-1-like protein) (GTPase regulator associated with focal adhesion kinase)
XM_926802	LOC643479	1.121 up	hypothetical protein LOC643479
XM_926797	LOC643473	1.387 down	hypothetical protein LOC643473
XM_926796	CLDN22	1.035 down	claudin 22
XM_926793	LOC642757	1.078 up	hypothetical protein LOC642757
XM_926790	LOC643467	1.023 down	similar to centrosome-associated protein 350
XM_926789	LOC643466	1.109 up	hypothetical protein LOC643466
XM_926788	LOC643465	1.206 down	hypothetical protein LOC643465
XM_926780	LOC643448	1.167 down	hypothetical protein LOC643448
XM_926778	LOC653180	1.289 down	similar to UDP-glucuronosyltransferase 2B15 precursor (UDPGT) (UDPGTh-3) (HLUG4)
XM_926775	LOC643444	1.125 up	similar to WAS protein homology region 2 domain containing 1-like 1
XM_926772	CXorf24	1.023 up	chromosome X open reading frame 24
XM_926771	LOC643439	1.026 down	hypothetical protein LOC643439
XM_926770	LOC653305	1.032 down	similar to similar to chromosome 2 open reading frame 27
XM_926769	tcag7.1239	1.323 down	Rho guanine nucleotide exchange factor (GEF) 5
XM_926767	MGC5566	1.142 down	hypothetical protein MGC5566
XM_926764	LOC643428	1.109 down	hypothetical protein LOC643428
XM_926762	LOC653253	1.064 down	similar to vitamin K epoxide reductase complex, subunit 1-like 1
XM_926759	LOC643425	1.143 down	similar to Chondrosarcoma-associated protein 2 (Taxol resistant-associated protein 3) (TRAG-3)
XM_926758	LOC643423	none	similar to T-box 1 isoform C
XM_926757	LOC643422	1.077 up	similar to hect domain and RLD 2
XM_926755	LOC642718	2.358 up	hypothetical protein LOC642718
XM_926753	LOC643420	1.014 down	similar to hect domain and RLD 2
XM_926751	LOC643418	1.124 down	similar to lipase A precursor
XM_926750	LOC643417	1.161 up	similar to CD2-associated protein
XM_926748	LOC643416	1.134 down	similar to CDK2-associated protein 2
XM_926746	RP11-186O14.2	1.022 up	lipase-like, ab-hydrolase domain containing 2
XM_926744	LOC643253	1.065 down	similar to chaperonin subunit 6a (zeta)
XM_926743	LOC643409	1.072 up	hypothetical protein LOC643409
XM_926740	LOC643405	1.130 down	similar to TGF-beta induced apotosis protein 2
XM_926738	LOC643403	1.021 up	hypothetical protein LOC643403
XM_926737	LOC643402	1.056 down	hypothetical protein LOC643402
XM_926735	LOC643399	1.109 up	similar to cell division cycle 42
XM_926731	LOC643396	2.003 up	hypothetical protein LOC643396
XM_926729	LOC643395	1.288 down	hypothetical protein LOC643395
XM_926728	SPINK9	1.169 up	serine protease inhibitor Kazal type 9
XM_926725	LOC643391	1.041 up	similar to myoferlin isoform b
XM_926721	LOC643389	1.105 up	hypothetical protein LOC643389
XM_926720	PSPHL	1.053 up	phosphoserine phosphatase-like
XM_926719	LOC643388	1.247 down	hypothetical protein LOC643388
XM_926717	LOC643386	1.047 up	similar to actin, alpha 2, smooth muscle, aorta
XM_926714	LOC442448	1.483 down	similar to Antigen KI-67
XM_926711	LOC643382	1.702 down	hypothetical protein LOC643382
XM_926710	LOC643381	1.032 down	hypothetical protein LOC643381
XM_926707	LOC642617	1.367 down	hypothetical protein LOC642617
XM_926705	LOC643378	1.033 up	hypothetical protein LOC643378
XM_926704	LOC643376	1.021 up	similar to Kelch-like protein 2
XM_926703	LOC642817	1.114 down	similar to Heterogeneous nuclear ribonucleoprotein A1 (Helix-destabilizing protein) (Single-strand binding protein) (hnRNP core protein A1) (HDP-1) (Topoisomerase-inhibitor suppressed)
XM_926699	LOC643369	1.191 down	hypothetical protein LOC643369
XM_926698	LOC643368	1.060 down	hypothetical protein LOC643368
XM_926697	FLJ44451	1.369 up	FLJ44451 fis
XM_926695	LOC643363	1.074 down	hypothetical protein LOC643363
XM_926694	LOC643362	1.313 up	similar to capicua homolog
XM_926693	LOC643361	1.186 down	hypothetical protein LOC643361
XM_926692	LOC643360	1.319 down	similar to Glypican-5 precursor
XM_926690	LOC339970	1.205 down	similar to glutamate receptor, ionotropic, N-methyl D-aspartate-like 1A isoform 1
XM_926688	LOC643357	1.265 down	similar to SMT3 suppressor of mif two 3 homolog 2
XM_926687	LOC643356	1.217 down	hypothetical protein LOC643356
XM_926686	LOC653282	1.111 down	similar to hypothetical protein LOC255313
XM_926685	LOC643351	1.009 down	similar to interleukin 16 isoform 1 precursor
XM_926684	LOC653281	3.245 up	similar to FK506-binding protein 9 (Peptidyl-prolyl cis-trans isomerase) (PPIase) (Rotamase)
XM_926683	LOC643350	1.093 down	hypothetical protein LOC643350
XM_926679	LOC643346	1.849 down	hypothetical protein LOC643346
XM_926677	LOC643344	1.006 up	hypothetical protein LOC643344
XM_926676	LOC653277	1.102 down	similar to GM88 autoantigen isoform c
XM_926672	LOC285033	1.097 up	hypothetical protein LOC285033
XM_926671	KRTAP9-5	1.006 down	keratin associated protein 9-5
XM_926667	LOC643336	1.115 up	similar to cell division cycle 42
XM_926663	LOC643331	3.499 down	similar to Kinase suppressor of ras-1 (Kinase suppressor of ras) (mKSR1) (Hb protein)
XM_926662	LOC643330	1.039 up	similar to ribosomal protein L31
XM_926661	LOC643326	1.522 down	similar to beta-1,4-mannosyltransferase
XM_926660	LOC643323	1.135 down	similar to keratin associated protein 9.2
XM_926658	LOC643320	1.043 down	hypothetical protein LOC643320
XM_926657	LOC643311	1.122 down	hypothetical protein LOC643311
XM_926656	LOC643310	1.064 up	similar to heat shock 70kD protein binding protein
XM_926650	LOC643304	1.141 down	hypothetical protein LOC643304
XM_926648	LOC643302	1.036 up	similar to Ras suppressor protein 1
XM_926644	LOC643298	1.090 up	similar to Thyroid hormone receptor-associated protein complex 240 kDa component (Trap240) (Thyroid hormone receptor associated protein 1) (Vitamin D3 receptor-interacting protein complex component DRIP250) (DRIP 250) (Activator-recruited cofactor ...
XM_926643	tcag7.926	1.050 down	Rho guanine nucleotide exchange factor (GEF) 5
XM_926640	LOC653261	1.037 down	similar to Acidic mammalian chitinase precursor (AMCase) (TSA1902)
XM_926639	LOC643286	1.007 down	hypothetical protein LOC643286
XM_926638	LOC643285	1.153 up	hypothetical protein LOC643285
XM_926633	LOC643272	1.012 up	hypothetical protein LOC643272
XM_926629	LOC653255	1.054 down	similar to FLJ45445 protein
XM_926628	LOC643266	2.470 down	hypothetical protein LOC643266
XM_926627	LOC643265	1.224 down	similar to heat shock protein 90Bf
XM_926622	LOC643262	1.064 up	hypothetical protein LOC643262
XM_926621	LOC643261	1.089 down	similar to heat shock protein 90Bf
XM_926619	LOC643258	1.177 down	similar to Transcript Y 10 protein
XM_926614	LOC653250	1.453 up	similar to rho guanine nucleotide exchange factor 5 isoform 1
XM_926611	LOC643248	1.037 up	similar to myosin XVB pseudogene
XM_926610	KRTAP4-15	1.060 up	keratin associated protein 4-15
XM_926608	LOC643246	1.199 down	similar to microtubule-associated proteins 1A/1B light chain 3
XM_926604	LOC642696	1.138 up	hypothetical protein LOC642696
XM_926602	LOC643240	1.099 down	similar to Cas-Br-M (murine) ecotropic retroviral transforming sequence-like 1
XM_926598	LOC643237	1.031 down	hypothetical protein LOC643237
XM_926597	LOC643236	1.019 up	hypothetical protein LOC643236
XM_926596	LOC401351	1.017 down	hypothetical gene supported by BC040831
XM_926594	LOC642502	1.003 up	similar to succinate dehydrogenase complex, subunit C isoform 3 precursor
XM_926592	LOC643233	1.513 down	similar to CG5327-PA
XM_926591	LOC653242	1.483 down	similar to fumarylacetoacetate hydrolase domain containing 2A
XM_926590	LOC653240	1.050 up	similar to keratin associated protein 4-14
XM_926587	LOC643227	1.014 down	similar to ubiquitin-conjugating enzyme E2 variant 1
XM_926586	LOC643226	1.003 down	similar to glutaredoxin cysteine-rich 1 protein
XM_926584	FLJ39396	3.692 up	unknown
XM_926583	LOC643222	1.039 down	similar to Anosmin-1 precursor (Kallmann syndrome protein) (Adhesion molecule-like X-linked)
XM_926578	LOC643216	1.158 up	hypothetical protein LOC643216
XM_926575	LOC643211	1.623 down	hypothetical protein LOC643211
XM_926574	LOC653235	1.163 down	similar to keratin associated protein 4-12
XM_926573	LOC653140	1.011 up	similar to FLJ30851 protein
XM_926569	LOC643205	1.224 down	similar to ribosomal protein L36
XM_926563	LOC643195	1.266 down	similar to jerky homolog
XM_926560	LOC643191	1.065 up	similar to tigger transposable element derived 2
XM_926558	LOC642453	1.543 up	hypothetical protein LOC642453
XM_926555	LOC643186	1.083 down	hypothetical protein LOC643186
XM_926554	LOC643185	1.051 up	similar to keratin associated protein 2-4
XM_926550	LOC653228	1.093 down	similar to hypothetical protein LOC348840
XM_926548	LOC653227	1.090 up	similar to Gamma-aminobutyric-acid receptor gamma-3 subunit precursor (GABA(A) receptor)
XM_926546	LOC643179	1.028 up	similar to NADH dehydrogenase (ubiquinone) 1 beta subcomplex, 5, 16kDa precursor
XM_926544	LOC653225	1.042 down	similar to TFIIA-alpha and beta-like factor (General transcription factor II A, 1-like factor)
XM_926543	LOC643175	1.008 down	similar to Rap1 GTPase-GDP dissociation stimulator 1 (SMG P21 stimulatory GDP/GTP exchange protein) (SMG GDS protein) (Exchange factor smgGDS)
XM_926538	LOC653222	2.869 down	similar to Gamma-aminobutyric-acid receptor alpha-5 subunit precursor (GABA(A) receptor)
XM_926537	LOC642784	1.049 down	similar to eukaryotic translation initiation factor 4A, isoform 1
XM_926530	LOC643161	1.130 up	hypothetical protein LOC643161
XM_926528	LOC439992	1.108 down	similar to ribosomal protein S3a
XM_926525	DKFZP686E2158	1.044 down	hypothetical protein LOC643155
XM_926524	LOC643154	1.235 down	hypothetical protein LOC643154
XM_926523	LOC643150	1.228 down	similar to Ribosome biogenesis protein BMS1 homolog
XM_926522	LOC642350	1.072 up	similar to Coagulation factor V precursor (Activated protein C cofactor)
XM_926521	LOC653137	1.133 down	similar to hypothetical gene supported by BC039313
XM_926518	LOC643146	1.447 down	hypothetical protein LOC643146
XM_926517	LOC643145	1.042 down	hypothetical protein LOC643145
XM_926514	LOC643142	1.004 down	hypothetical protein LOC643142
XM_926511	LOC643138	1.051 down	similar to Guanine nucleotide-binding protein G(s), alpha subunit (Adenylate cyclase-stimulating G alpha protein) (G-alpha-8)
XM_926509	LOC653135	1.170 down	similar to Nucleosome binding protein 1 (Nucleosome binding protein 45) (NBP-45) (GARP45 protein)
XM_926508	LOC653107	4.387 up	annexin A8-like
XM_926507	LOC643134	1.245 up	similar to paired-like homeobox protein OTEX
XM_926506	LOC643133	1.417 down	hypothetical protein LOC643133
XM_926505	LOC643131	1.012 down	hypothetical protein LOC643131
XM_926502	LOC643128	1.027 down	similar to jumonji domain containing 2D
XM_926501	LOC642516	1.706 up	similar to profilin 1
XM_926500	LOC643127	1.033 down	similar to Protein C21orf63 precursor (SUE21)
XM_926499	LOC653214	1.039 down	similar to peptidylprolyl isomerase A isoform 1
XM_926497	LOC653213	1.076 down	similar to Nedd4 binding protein 1
XM_926493	LOC643121	1.282 down	hypothetical protein LOC643121
XM_926492	LOC643120	1.033 up	hypothetical protein LOC643120
XM_926491	PANK2	1.242 down	PANK2 protein
XM_926487	FLJ36868	1.224 down	hypothetical protein LOC642815
XM_926486	LOC643116	1.030 down	hypothetical protein LOC643116
XM_926480	ZNF717	1.302 down	zinc finger protein 717
XM_926478	LOC643107	1.088 up	similar to calponin 2 isoform a
XM_926474	LOC642648	1.219 down	hypothetical protein LOC642648
XM_926470	LOC642534	1.113 up	hypothetical protein LOC642534
XM_926469	LOC653204	1.261 up	similar to myotubularin related protein 1
XM_926467	LOC643093	1.034 down	hypothetical protein LOC643093
XM_926464	LOC642517	1.152 down	hypothetical protein LOC642517
XM_926462	LOC643087	1.003 up	similar to thioredoxin domain containing 11
XM_926460	LOC643083	1.043 down	hypothetical protein LOC643083
XM_926459	LOC642503	1.027 down	hypothetical protein LOC642503
XM_926458	LOC642749	1.008 up	similar to Succinate dehydrogenase [ubiquinone] flavoprotein subunit, mitochondrial precursor (Fp) (Flavoprotein subunit of complex II)
XM_926456	LOC653199	1.377 up	similar to KIAA0738 gene product
XM_926455	LOC653198	1.126 up	similar to phosphodiesterase 4D, cAMP specific
XM_926451	LOC653195	1.107 up	similar to chromosome X open reading frame 6
XM_926450	LOC643076	1.149 down	similar to thioredoxin domain containing 11
XM_926449	LOC653194	1.089 up	similar to chromosome 6 open reading frame 148
XM_926448	LOC653193	1.044 down	similar to Amphiregulin precursor (AR) (Colorectum cell-derived growth factor) (CRDGF)
XM_926447	SDHAL2	1.165 up	succinate dehydrogenase complex, subunit A, flavoprotein-like 2
XM_926446	LOC643071	1.002 up	similar to folate hydrolase
XM_926445	LOC643070	1.102 down	similar to glutamate decarboxylase 1
XM_926442	FLJ14126	1.099 up	hypothetical protein FLJ14126
XM_926441	LOC653113	1.777 down	similar to CG7889-PA
XM_926437	LOC653192	1.060 down	similar to tripartite motif protein 17
XM_926435	LOC653191	1.064 down	similar to ELG protein
XM_926433	LOC643062	1.221 up	similar to N-acetylated-alpha-linked acidic dipeptidase II (NAALADase II)
XM_926431	LOC643060	1.843 up	hypothetical protein LOC643060
XM_926430	LOC643059	1.208 up	hypothetical protein LOC643059
XM_926429	LOC653189	1.116 down	similar to basic transcription factor 3-like 4
XM_926427	LOC643057	1.334 down	similar to ribosomal protein S27
XM_926426	LOC642711	1.906 up	similar to junction-mediating and regulatory protein
XM_926425	LOC643055	1.882 down	similar to protein kinase CHK2 isoform b
XM_926422	LOC643052	1.747 up	similar to mucin 17
XM_926417	LOC643047	1.027 down	similar to Beta-glucuronidase precursor
XM_926415	LOC653115	1.214 down	similar to heterogeneous nuclear ribonucleoprotein A3
XM_926412	LOC643043	1.088 up	similar to scotin
XM_926409	LOC643040	1.074 up	hypothetical protein LOC643040
XM_926408	LOC643039	1.018 down	hypothetical protein LOC643039
XM_926407	LOC643038	1.080 up	similar to ATP-binding cassette, sub-family A, member 9 isoform a
XM_926406	LOC643037	1.018 up	hypothetical protein LOC643037
XM_926404	LOC643033	1.220 down	similar to Heterogeneous nuclear ribonucleoprotein A1 (Helix-destabilizing protein) (Single-strand binding protein) (hnRNP core protein A1) (HDP)
XM_926403	LOC643032	1.053 up	hypothetical protein LOC643032
XM_926402	LOC643031	1.057 down	similar to NADH dehydrogenase subunit 5
XM_926400	LOC643028	1.034 down	hypothetical protein LOC643028
XM_926399	LOC653186	1.022 down	similar to hypothetical protein LOC150763
XM_926392	LOC643017	1.164 down	similar to ribosomal protein L18a
XM_926391	LOC653122	1.394 down	similar to CG15735-PA
XM_926383	C10orf136	1.113 up	chromosome 10 open reading frame 136
XM_926382	LOC642755	1.270 up	similar to dexamethasone-induced protein
XM_926381	PPBPL2	1.203 down	pro-platelet basic protein-like 2
XM_926379	LOC440839	1.266 down	similar to HDCMB45P
XM_926378	LOC653125	1.254 down	similar to Golgi autoantigen, golgin subfamily A member 2 (Golgi matrix protein GM130)
XM_926377	LOC643001	1.798 down	similar to double homeobox, 4
XM_926376	LOC643000	1.019 down	hypothetical protein LOC643000
XM_926370	LOC642989	1.063 down	similar to 40S ribosomal protein S25
XM_926366	LOC653181	1.829 down	similar to Gamma-2-syntrophin (G2SYN) (Syntrophin 5) (SYN5)
XM_926364	LOC90120	1.171 down	hypothetical gene supported by AK023162
XM_926363	LOC642313	1.294 down	hypothetical protein LOC642313
XM_926362	LOC283683	1.535 up	hypothetical protein LOC283683
XM_926361	FLJ16423	1.112 up	hypothetical protein LOC642980
XM_926356	LOC642971	1.052 up	hypothetical protein LOC642971
XM_926355	LOC642535	1.140 down	similar to Succinate dehydrogenase [ubiquinone] flavoprotein subunit, mitochondrial precursor (Fp) (Flavoprotein subunit of complex II)
XM_926354	LOC642643	1.199 down	similar to hypothetical protein LOC375127
XM_926352	LOC642968	1.022 up	hypothetical protein LOC642968
XM_926351	LOC642966	1.069 up	similar to olfactory receptor 139
XM_926350	LOC642965	1.070 down	hypothetical protein LOC642965
XM_926348	LOC642633	1.060 down	hypothetical protein LOC642633
XM_926345	LOC642960	1.032 down	hypothetical protein LOC642960
XM_926343	LOC402217	1.618 down	similar to Temporarily Assigned Gene name family member (tag-151)
XM_926341	NKX1-1	1.094 up	HPX-153 homeobox
XM_926339	LOC389286	1.005 up	similar to FKSG62
XM_926338	LOC642956	1.104 down	similar to Fatty acid-binding protein, epidermal (E-FABP) (Psoriasis-associated fatty acid-binding protein homolog) (PA-FABP)
XM_926337	FAM92A1	1.030 up	family with sequence similarity 92, member A1
XM_926336	LOC642451	1.161 down	similar to ribosomal protein L7-like 1
XM_926334	LOC642953	1.090 up	similar to SH3/ankyrin domain gene 2 isoform a
XM_926330	LOC653175	1.200 down	similar to family with sequence similarity 29, member A
XM_926329	LPA	1.061 down	lipoprotein, Lp(a)
XM_926327	LOC653102	1.048 down	similar to Succinate dehydrogenase [ubiquinone] flavoprotein subunit, mitochondrial precursor (Fp) (Flavoprotein subunit of complex II)
XM_926326	FLJ46681	1.012 down	hypothetical protein LOC642588
XM_926325	LOC642619	1.043 down	similar to hypothetical protein LOC375127
XM_926324	LOC642943	1.249 down	similar to chromosome 9 open reading frame 36
XM_926323	LPA	1.001 up	lipoprotein, Lp(a)
XM_926322	LOC653171	1.148 down	similar to MAPK-interacting and spindle-stabilizing protein
XM_926319	LOC642941	1.486 up	similar to Nuclear receptor coactivator 6 (Amplified in breast cancer-3 protein) (Cancer-amplified transcriptional coactivator ASC-2) (Activating signal cointegrator-2) (ASC-2) (Peroxisome proliferator-activated receptor-interacting protein) (PPAR-...
XM_926317	LOC653169	1.018 up	similar to family with sequence similarity 11, member A
XM_926315	LOC642936	1.226 down	similar to zinc finger protein 317
XM_926314	OR1D5	1.109 down	olfactory receptor, family 1, subfamily D, member 5
XM_926310	LOC642931	1.274 down	similar to N-acetylated-alpha-linked acidic dipeptidase II (NAALADase II)
XM_926309	LOC653166	1.131 down	similar to olfactory receptor, family 1, subfamily D, member 4
XM_926307	LOC642927	1.022 down	similar to alpha 3 type IV collagen isoform 1, precursor
XM_926306	LOC642926	1.045 down	similar to Doublecortin domain-containing protein 2
XM_926303	LOC642922	1.327 up	similar to CG13731-PA
XM_926299	LOC653165	1.010 up	similar to COBW domain containing 3
XM_926298	LOC642914	1.477 down	similar to zinc finger protein 135 (clone pHZ-17)
XM_926293	LOC653163	1.017 up	similar to Von Ebners gland protein precursor (VEG protein) (Tear prealbumin) (TP) (Tear lipocalin) (Lipocalin 1)
XM_926288	LOC642908	2.085 up	similar to RAB41 protein
XM_926285	LOC642903	1.057 up	hypothetical protein LOC642903
XM_926284	MGC42638	1.170 down	hypothetical protein MGC42638
XM_926283	LOC642902	1.154 down	hypothetical protein LOC642902
XM_926275	HS6ST3	1.058 up	heparan sulfate 6-O-sulfotransferase 3
XM_926273	LOC642892	1.258 down	similar to 40S ribosomal protein S29
XM_926271	LOC146429	1.761 down	hypothetical protein LOC146429
XM_926270	FLJ16423	1.217 up	hypothetical protein LOC642889
XM_926264	LOC642878	1.176 down	hypothetical protein LOC642878
XM_926263	LOC642877	1.065 up	similar to serine/arginine repetitive matrix 2
XM_926262	DKFZP779L1068	1.315 up	PRO0845
XM_926258	LOC653157	1.439 up	similar to Iduronate 2-sulfatase precursor (Alpha-L-iduronate sulfate sulfatase) (Idursulfase)
XM_926257	LOC642869	1.357 down	similar to SET protein (Phosphatase 2A inhibitor I2PP2A) (I-2PP2A) (Template-activating factor I) (TAF-I) (Liver regeneration-related protein LRRGR00002)
XM_926254	LOC653155	1.100 down	similar to PRP4 pre-mRNA processing factor 4 homolog B (yeast) (predicted)
XM_926253	LOC642861	1.587 down	hypothetical protein LOC642861
XM_926250	LOC642856	1.096 down	hypothetical protein LOC642856
XM_926249	LOC642852	1.116 up	hypothetical protein LOC642852
XM_926248	LOC642851	1.015 up	similar to upstream binding protein 1
XM_926246	LOC642849	1.537 down	similar to fibronectin type III domain containing 7
XM_926245	MICAL3	1.075 down	microtubule associated monoxygenase, calponin and LIM domain containing 3
XM_926244	LOC642455	1.212 down	similar to Formin-binding protein 3 (Formin-binding protein 11) (FBP 11)
XM_926243	LOC642464	1.019 up	similar to Nanog homeobox
XM_926241	LOC642843	1.055 up	similar to Cleavage and polyadenylation specificity factor, 30 kDa subunit (CPSF 30 kDa subunit) (NS1 effector domain-binding protein 1) (Neb-1) (No arches homolog)
XM_926239	C21orf122	1.006 up	chromosome 21 open reading frame 122
XM_926237	LOC642837	1.083 down	similar to SR protein related family member (rsr-1)
XM_926234	LOC642832	2.565 up	similar to transcription elongation regulator 1-like
XM_926232	LOC642830	1.012 down	similar to N-acetylated-alpha-linked acidic dipeptidase II (NAALADase II)
XM_926231	LOC642829	1.010 down	similar to actin-like protein
XM_926229	LOC642452	1.308 up	hypothetical protein LOC642452
XM_926228	LOC642825	2.564 up	hypothetical protein LOC642825
XM_926225	LOC642820	1.221 down	hypothetical protein LOC642820
XM_926224	LOC642819	1.230 up	similar to zinc finger protein 12 (KOX 3)
XM_926222	LOC441368	1.101 down	similar to Ceruloplasmin precursor (Ferroxidase)
XM_926221	LOC653091	1.626 down	similar to cis-Golgi matrix protein GM130
XM_926216	LOC642809	1.879 down	similar to protein kinase CHK2 isoform b
XM_926215	LOC642808	1.113 down	similar to RAD52 motif 1 isoform 1
XM_926213	LOC653149	1.120 down	similar to myomegalin
XM_926212	LOC642804	1.023 up	hypothetical protein LOC642804
XM_926209	LOC642801	1.248 down	hypothetical protein LOC642801
XM_926208	LOC653147	1.191 down	similar to 60S ribosomal protein L26-like 1
XM_926207	LOC642795	1.430 down	hypothetical protein LOC642795
XM_926206	LOC653146	1.691 down	similar to Dynamin-1 (D100) (Dynamin, brain) (B-dynamin)
XM_926203	LOC642790	1.048 down	similar to solute carrier family 25 member 24 isoform 1
XM_926202	LOC642787	1.001 up	hypothetical protein LOC642787
XM_926200	LOC642785	1.003 up	similar to RAD52 homolog B
XM_926199	FAT3	2.065 up	FAT tumor suppressor homolog 3 (Drosophila)
XM_926198	LOC642776	1.004 down	hypothetical protein LOC642776
XM_926197	LOC642775	1.691 down	hypothetical protein LOC642775
XM_926194	LOC642772	1.049 down	hypothetical protein LOC642772
XM_926193	LOC642771	1.127 down	similar to Golgi autoantigen, golgin subfamily A member 2 (Golgi matrix protein GM130)
XM_926192	LOC642504	1.164 down	hypothetical protein LOC642504
XM_926190	LOC642767	1.288 up	similar to Leucine-rich repeat-containing protein 1 (LAP and no PDZ protein) (LANO adapter protein)
XM_926188	LOC653143	1.110 down	similar to enamelin
XM_926184	LOC642762	1.117 up	similar to ATP-binding cassette sub-family D member 1 (Adrenoleukodystrophy protein) (ALDP)
XM_926183	LOC642761	1.340 down	hypothetical protein LOC642761
XM_926181	LOC642747	1.094 down	similar to N-acetylated-alpha-linked acidic dipeptidase II (NAALADase II)
XM_926179	LOC642744	1.233 down	similar to Ribosome biogenesis protein BMS1 homolog
XM_926178	LOC642743	1.064 down	hypothetical protein LOC642743
XM_926167	LOC642422	1.075 down	hypothetical protein LOC642422
XM_926164	LOC642720	1.150 up	hypothetical protein LOC642720
XM_926158	LOC642443	1.182 down	similar to Alcohol dehydrogenase class III chi chain (Glutathione-dependent formaldehyde dehydrogenase) (FDH)
XM_926157	LOC284821	1.098 down	similar to ribosomal protein L13a
XM_926156	FAM7A2	1.242 down	alt 'B'-T#D-X#FAM7B1#MGC104367'; family with sequence similarity 7, member A2
XM_926154	LOC642707	1.541 down	similar to Hornerin
XM_926152	LOC642705	1.302 up	hypothetical protein LOC642705
XM_926151	LOC653138	1.506 up	similar to similar to RPL23AP7 protein
XM_926147	LOC642698	1.481 up	hypothetical protein LOC642698
XM_926146	LOC390372	1.085 down	similar to zinc finger protein 114
XM_926144	LOC642695	1.248 up	similar to Transcript Y 7 protein
XM_926143	LOC642692	1.060 up	hypothetical protein LOC642692
XM_926142	LOC642691	1.203 down	hypothetical protein LOC642691
XM_926140	LOC642688	1.218 down	similar to heat shock protein 90Bf
XM_926138	LOC642685	1.023 down	similar to maternal G10 transcript
XM_926137	LOC642684	1.052 up	similar to Maltase-glucoamylase, intestinal
XM_926134	PTPRQ	1.031 down	protein tyrosine phosphatase, receptor type, Q
XM_926133	LOC642375	1.298 down	hypothetical protein LOC642375
XM_926132	LOC642680	1.120 down	hypothetical protein LOC642680
XM_926131	LOC642679	1.323 down	similar to Protein C21orf70 homolog
XM_926130	LOC642678	1.123 up	similar to myeloid/lymphoid or mixed-lineage leukemia 3 isoform 2
XM_926129	LOC642677	1.112 down	hypothetical protein LOC642677
XM_926128	LOC642676	1.008 down	similar to TBC1 domain family, member 3
XM_926125	LOC642466	3.452 down	region containing family with sequence similarity 7, member A1; family with sequence similarity 7, member A3
XM_926124	LOC642671	1.441 down	hypothetical protein LOC642671
XM_926123	LOC642669	1.010 down	hypothetical protein LOC642669
XM_926122	LOC642668	1.168 down	similar to otogelin
XM_926120	LOC653123	1.181 down	similar to FLJ45202 protein
XM_926118	LOC642663	1.292 up	similar to capicua homolog
XM_926116	LOC642658	1.045 down	similar to Basic helix-loop-helix transcription factor scleraxis
XM_926115	LOC642657	1.098 down	hypothetical protein LOC642657
XM_926114	LOC642655	1.094 up	similar to succinate dehydrogenase complex, subunit A, flavoprotein-like 2
XM_926113	LOC642651	1.176 up	hypothetical protein LOC642651
XM_926111	LOC653120	1.583 down	similar to chromosome 9 open reading frame 36
XM_926109	LOC642646	1.112 up	similar to zinc finger protein 561
XM_926107	LOC642639	1.045 up	similar to Contactin-associated protein-like 3 precursor (Cell recognition molecule Caspr3)
XM_926105	LOC642636	1.050 down	similar to Double-strand-break repair protein rad21 homolog (Pokeweed agglutinin-binding protein 29) (PW29) (SCC1 homolog)
XM_926103	LOC642634	1.508 up	similar to mucin 17
XM_926102	LOC642359	1.651 down	hypothetical protein LOC642359
XM_926100	LOC642629	1.406 down	similar to chromosome 9 open reading frame 36
XM_926099	LOC642628	1.059 up	hypothetical protein LOC642628
XM_926097	LOC642626	1.385 down	similar to Zinc finger protein 141
XM_926096	LOC642625	1.085 up	similar to Nitric oxide synthase, inducible (NOS type II) (Inducible NOS) (iNOS) (Hepatocyte NOS) (HEP-NOS)
XM_926095	LOC642624	1.744 up	similar to ZK84.1
XM_926094	LOC642623	1.395 down	similar to Nucleolar transcription factor 1 (Upstream binding factor 1) (UBF-1)
XM_926093	LOC642621	1.002 down	hypothetical protein LOC642621
XM_926091	LOC642615	1.040 up	hypothetical protein LOC642615
XM_926089	LOC642612	1.226 down	similar to tripartite motif protein 39
XM_926088	FLJ00038	1.058 down	CXYorf1-related protein
XM_926087	OK/SW-CL.89	1.032 down	OK/SW-CL.89
XM_926086	LOC653114	1.180 down	similar to novel protein
XM_926083	LOC642607	1.056 up	similar to Nitric oxide synthase, inducible (NOS type II) (Inducible NOS) (iNOS) (Hepatocyte NOS) (HEP-NOS)
XM_926081	LOC642602	1.055 up	similar to spermatogenesis and centriole associated 1
XM_926077	LOC653086	1.265 up	similar to RAN-binding protein 2-like 1 isoform 2
XM_926076	LOC642595	1.032 down	similar to SET domain and mariner transposase fusion gene
XM_926074	LOC642594	1.266 up	similar to ribosomal protein S6 kinase, polypeptide 1
XM_926073	LOC653111	1.626 down	similar to RING finger protein 18 (Testis-specific ring-finger protein)
XM_926071	LOC642592	1.194 down	similar to eukaryotic translation initiation factor 5A
XM_926068	LOC642584	1.539 up	similar to epiplakin 1
XM_926067	LOC642583	1.266 up	hypothetical protein LOC642583
XM_926065	LOC642581	1.469 down	similar to coxsackie virus and adenovirus receptor precursor
XM_926063	LOC642578	1.054 up	similar to acyl-CoA synthetase medium-chain family member 1
XM_926060	LOC642574	1.007 down	similar to CG3104-PA, isoform A
XM_926058	LOC642571	1.316 down	hypothetical protein LOC642571
XM_926057	LOC642570	1.547 down	hypothetical protein LOC642570
XM_926054	LOC642568	1.078 down	hypothetical protein LOC642568
XM_926053	LOC653082	1.490 down	similar to zinc finger, DHHC domain containing 11
XM_926051	LOC642548	1.191 down	similar to Ribosome biogenesis protein BMS1 homolog
XM_926050	LOC642333	1.008 up	similar to M-phase phosphoprotein, mpp8
XM_926047	LOC642561	1.078 down	similar to FXYD domain-containing ion transport regulator 6
XM_926044	LOC653104	1.164 up	similar to neuregulin 1 isoform GGF2
XM_926042	HSP90AA6P	1.105 down	heat shock protein 90kDa alpha (cytosolic), class A member 6 (pseudogene)
XM_926041	LOC642553	1.123 down	hypothetical protein LOC642553
XM_926036	LOC653103	1.013 up	similar to Ankyrin repeat domain protein 11 (Ankyrin repeat-containing cofactor 1)
XM_926028	LOC642539	1.012 up	similar to glucosidase, alpha, acid
XM_926027	LOC642538	1.139 down	similar to nuclear DNA-binding protein
XM_926025	LOC642536	1.310 down	similar to Matrin-3
XM_926024	LOC347364	1.153 down	similar to WW domain binding protein 11
XM_926023	LOC642530	1.439 down	hypothetical protein LOC642530
XM_926022	LOC642528	1.160 up	hypothetical protein LOC642528
XM_926021	LOC642527	1.332 up	similar to Sorting nexin-19
XM_926019	LOC642525	1.047 down	similar to actin-like protein
XM_926017	LOC642521	1.098 down	similar to nuclear DNA-binding protein
XM_926016	LOC642520	1.133 down	similar to partitioning-defective protein 3 homolog isoform 3
XM_926011	LOC642515	1.102 down	similar to NG5 protein
XM_926010	LOC642514	1.199 down	hypothetical protein LOC642514
XM_926008	LOC642512	1.016 down	hypothetical protein LOC642512
XM_926006	LOC642509	1.131 down	hypothetical protein LOC642509
XM_926003	LOC642506	1.016 down	similar to double homeobox 4c
XM_926002	LOC642505	1.193 down	similar to Septin-2 (NEDD5 protein homolog)
XM_926000	FAM7A3	3.190 down	family with sequence similarity 7, member A3
XM_925998	SRA1	1.050 down	steroid receptor RNA activator 1
XM_925997	LOC642497	1.097 up	similar to Probable DNA dC->dU editing enzyme APOBEC-3B (Phorbolin-1-related protein) (Phorbolin-2/3)
XM_925991	KIAA0692	1.541 up	KIAA0692
XM_925989	LOC642489	1.662 up	similar to FK506-binding protein 1A
XM_925986	LOC642483	1.106 down	similar to fibroblast growth factor receptor 2 isoform IIIb
XM_925983	LOC642480	1.563 down	similar to poly(A) binding protein, cytoplasmic 1
XM_925980	LOC442446	1.011 up	similar to Nucleolar transcription factor 1 (Upstream binding factor 1) (UBF-1) (Autoantigen NOR-90)
XM_925979	C8orf73	1.068 up	chromosome 8 open reading frame 73
XM_925977	LOC642473	1.077 down	similar to general transcription factor II, i isoform 1
XM_925975	LOC642471	1.014 down	hypothetical protein LOC642471
XM_925973	LOC653097	1.440 down	similar to CG10806-like
XM_925969	LOC642461	1.061 down	similar to mitochondrial isoleucine tRNA synthetase
XM_925964	LOC642456	1.027 down	hypothetical protein LOC642456
XM_925962	LOC642449	1.088 down	hypothetical protein LOC642449
XM_925960	LOC642447	1.076 up	hypothetical protein LOC642447
XM_925959	LOC642446	1.132 down	similar to tripartite motif protein 17
XM_925955	LOC642278	1.111 up	hypothetical protein LOC642278
XM_925952	LOC642440	1.242 down	similar to 40S ribosomal protein S17
XM_925950	LOC653093	1.082 down	similar to CG9240-PA
XM_925945	LOC653073	1.272 down	similar to golgi autoantigen, golgin family member
XM_925944	LOC653092	1.188 up	similar to SLIT and NTRK-like family, member 2
XM_925943	LOC642429	1.614 down	similar to chromosome 9 open reading frame 36
XM_925940	LOC642424	1.105 up	similar to Ig kappa chain V-I region Walker precursor
XM_925937	LOC642419	1.118 down	hypothetical protein LOC642419
XM_925934	LOC441662	1.672 down	similar to CXXC finger 6
XM_925929	LOC653056	1.134 up	similar to hypothetical gene supported by AK024248; AL137733
XM_925927	LOC642408	1.028 up	hypothetical protein LOC642408
XM_925925	LOC642404	1.065 down	similar to SET domain and mariner transposase fusion gene
XM_925924	LOC642403	1.034 down	similar to heat shock protein 90Bf
XM_925922	LOC642401	1.623 down	similar to CXXC finger 6
XM_925921	LOC642400	1.547 down	similar to tripartite motif protein 17
XM_925915	LOC642387	none	similar to heat shock protein 90Bf
XM_925913	LOC653063	1.057 down	similar to ATPase, Class II, type 9B
XM_925912	LOC653045	1.088 down	similar to protein tyrosine phosphatase, non-receptor type 20
XM_925910	LOC642381	1.275 up	similar to CG9924-PC, isoform C
XM_925909	LOC642380	1.254 down	similar to heat shock protein 90Bf
XM_925907	LOC642378	1.011 up	hypothetical protein LOC642378
XM_925906	LOC642377	1.090 down	similar to solute carrier family 22 member 4
XM_925903	LOC642331	1.143 up	similar to nuclear protein in testis
XM_925901	LOC642369	1.097 down	hypothetical protein LOC642369
XM_925900	LOC653050	1.001 up	similar to Tektin-3
XM_925896	LOC642368	1.301 down	similar to SMT3 suppressor of mif two 3 homolog 2
XM_925895	LOC653084	1.012 up	similar to retrotransposon-like 1
XM_925893	LOC642365	1.018 down	hypothetical protein LOC642365
XM_925891	LOC642362	1.198 down	similar to tripartite motif protein 39
XM_925889	LOC653088	1.096 down	similar to synovial sarcoma, X breakpoint 2 isoform b
XM_925886	LOC642355	1.154 up	similar to Nucleoside diphosphate kinase, mitochondrial precursor (NDP kinase, mitochondrial) (NDK) (nm23-H4) (Nucleoside diphosphate kinase D) (NDPKD)
XM_925881	LOC642348	1.148 down	hypothetical protein LOC642348
XM_925880	LOC642347	1.240 down	similar to UDP-glucuronosyltransferase 2B7 precursor (UDPGT) (3,4-catechol estrogen specific) (UDPGTh-2)
XM_925879	LOC642346	1.265 down	similar to golgi autoantigen, golgin subfamily a-like
XM_925878	LOC642344	1.072 up	similar to N-acetylated-alpha-linked acidic dipeptidase II (NAALADase II)
XM_925877	LOC653081	1.175 down	similar to similar to RPL23AP7 protein
XM_925876	LOC642342	1.667 down	similar to Contactin-associated protein-like 3 precursor (Cell recognition molecule Caspr3)
XM_925874	LOC642338	1.095 down	similar to vomeronasal 1 receptor, C3
XM_925869	LOC653076	1.023 down	similar to zinc finger protein 658B
XM_925865	LOC642326	1.030 up	similar to CG8443-PA
XM_925863	LOC642323	1.606 up	similar to Rap1 GTPase-GDP dissociation stimulator 1 (SMG P21 stimulatory GDP/GTP exchange protein) (SMG GDS protein) (Exchange factor smgGDS)
XM_925856	LOC642314	1.026 down	similar to cyclin fold protein 1 isoform 1
XM_925855	FLJ39632	1.066 down	hypothetical protein LOC642477
XM_925847	LOC642302	1.032 up	similar to hect domain and RLD 2
XM_925843	LOC653089	1.139 down	similar to protein expressed in prostate, ovary, testis, and placenta 14 isoform POTE-14C
XM_925842	C1R	1.431 down	complement component 1, r subcomponent
XM_925841	LOC653068	1.005 up	similar to TBP-associated factor 9L
XM_925839	LOC158301	1.187 down	hypothetical protein LOC158301
XM_925838	LOC642295	1.400 down	hypothetical protein LOC642295
XM_925831	LOC642287	1.105 down	similar to Forkhead box protein N4
XM_925830	LOC642286	1.020 down	hypothetical protein LOC642286
XM_925827	MGC26356	1.360 down	similar to zinc finger protein 595
XM_925826	LOC642277	1.074 down	hypothetical protein LOC642277
XM_925825	LOC642276	1.042 down	similar to CG3950-PA
XM_925823	FAM110C	1.365 up	family with sequence similarity 110 member C
XM_925822	LOC642272	1.088 down	similar to Nitric oxide synthase, inducible (NOS type II) (Inducible NOS) (iNOS) (Hepatocyte NOS) (HEP-NOS)
XM_925817	LOC641702	1.226 down	F379 retina-specific protein
XM_925816	LOC642395	1.602 down	similar to paraspeckle protein 1
XM_925815	FLJ32810	1.096 down	hypothetical protein FLJ32810
XM_925814	RP11-95H8.1	1.439 down	similar to chromosome 9 open reading frame 36
XM_925813	LOC642264	1.010 up	similar to SET domain and mariner transposase fusion gene
XM_925812	LOC401280	1.295 up	hypothetical gene supported by AK125637
XM_925811	LOC642263	1.148 up	hypothetical protein LOC642263
XM_925810	LOC642262	1.580 up	similar to nuclear receptor coactivator 4
XM_925804	LOC642257	1.220 up	similar to similar to RPL23AP7 protein
XM_925801	LOC653047	1.942 up	similar to TBC1 domain family member 3 (Rab GTPase-activating protein PRC17) (Prostate cancer gene 17 protein) (TRE17 alpha protein)
XM_925800	LOC653052	1.204 down	similar to Homeodomain-interacting protein kinase 2 (hHIPk2)
XM_925795	LOC653051	1.011 up	similar to Double C2-like domain containing protein beta (Doc2 beta)
XM_925794	LOC641706	1.741 up	hypothetical protein LOC641706
XM_925793	LOC641705	1.152 up	similar to RNA-binding region (RNP1, RRM) containing 3
XM_925789	LOC653039	1.227 up	similar to RAN-binding protein 2-like 1 isoform 2
XM_925788	LOC400723	1.070 up	hypothetical LOC400723
XM_925787	LOC653043	1.498 down	similar to cell recognition molecule CASPR3
XM_925786	LOC653041	1.060 up	similar to CG11699-PA
XM_925785	LOC641699	1.091 down	similar to retrotransposon gag domain containing 1
XM_925783	LOC641697	1.086 down	similar to ribosomal protein S6 kinase, polypeptide 1
XM_925780	LOC641694	1.691 up	similar to SLIT-ROBO Rho GTPase-activating protein 2 (srGAP2) (Formin-binding protein 2)
XM_925777	LOC653037	1.097 up	similar to CXYorf1-related protein
XM_925776	LOC388163	1.035 up	hypothetical LOC388163
XM_499400	LOC442285	1.033 down	hypothetical LOC442285
XM_499356	LOC442609	1.143 up	similar to Williams Beuren syndrome chromosome region 19
XM_499338	LOC653434	1.084 up	similar to similar to Williams Beuren syndrome chromosome region 19
XM_499334	LOC441261	1.186 up	similar to Farnesyl pyrophosphate synthetase (FPP synthetase) (FPS) (Farnesyl diphosphate synthetase)
XM_499317	LOC653312	1.156 up	similar to similar to Williams Beuren syndrome chromosome region 19
XM_499315	LOC442573	1.065 up	similar to postmeiotic segregation increased 2-like 2
XM_499314	LOC442572	1.137 up	similar to Williams Beuren syndrome chromosome region 19
XM_499305	LOC441239	1.046 down	hypothetical gene supported by BC063653
XM_499267	LOC653730	1.149 down	similar to 60S ribosomal protein L21
XM_499253	LOC442501	1.134 down	similar to zinc finger protein 660
XM_499226	LOC402232	1.265 down	hypothetical LOC402232
XM_499193	LOC441580	1.113 up	hypothetical LOC441580
XM_499190	LOC441546	1.072 up	hypothetical LOC441546
XM_499183	LOC441503	1.439 up	hypothetical LOC441503
XM_499157	LOC441461	1.024 down	hypothetical gene supported by BC030123
XM_499132	LOC441385	1.296 up	hypothetical LOC441385
XM_499128	LOC441378	1.237 down	hypothetical LOC441378
XM_499123	FLJ46284	1.120 down	hypothetical gene supported by AK128161
XM_499117	FLJ39080	1.044 down	hypothetical gene supported by AK096399
XM_499105	FAM66E	1.351 down	family with sequence similarity 66, member E
XM_499104	LOC441340	1.303 down	hypothetical LOC441340
XM_499097	LOC441316	1.030 down	hypothetical LOC441316
XM_499075	LOC442597	1.012 down	hypothetical LOC442597
XM_499072	LOC441249	1.029 up	hypothetical LOC441249
XM_499062	LOC441205	1.020 down	hypothetical LOC441205
XM_499061	LOC441204	1.033 up	hypothetical LOC441204
XM_499058	LOC442512	1.028 down	similar to U2 small nuclear ribonucleoprotein A (U2 snRNP-A)
XM_499044	C6orf217	1.018 up	chromosome 6 open reading frame 217
XM_499042	LOC441167	1.606 down	hypothetical LOC441167
XM_499025	LOC441127	1.070 down	hypothetical LOC441127
XM_499024	LOC441126	1.259 up	hypothetical gene supported by BC042032
XM_499022	LOC441124	1.229 up	hypothetical gene supported by AK093729; BX647918
XM_499019	LOC441119	1.062 down	hypothetical LOC441119
XM_499010	LOC441097	1.096 up	hypothetical LOC441097
XM_499008	FLJ42709	1.113 down	hypothetical gene supported by AK124699
XM_499003	LOC441086	1.034 up	hypothetical gene supported by BC039003
XM_498999	LOC441074	1.079 up	hypothetical LOC441074
XM_498986	LOC441052	1.061 up	hypothetical gene supported by AF131741
XM_498974	LOC441031	1.019 down	hypothetical LOC441031
XM_498969	LOC441019	1.112 down	hypothetical gene supported by X97260; BC070289
XM_498965	LOC441009	1.097 up	hypothetical LOC441009
XM_498961	LOC441005	1.159 up	hypothetical gene supported by BC010180
XM_498955	LOC440995	1.113 up	hypothetical gene supported by BC034933; BC068085
XM_498952	LOC440990	2.188 down	similar to ribosomal protein L22 like 1
XM_498946	LOC440983	1.114 up	hypothetical gene supported by BC066916
XM_498945	FLJ30375	1.029 up	hypothetical gene supported by AK054937
XM_498925	LOC440943	1.010 up	hypothetical LOC440943
XM_498917	LOC440928	1.102 up	hypothetical gene supported by AK096649
XM_498914	FLJ46875	1.145 up	hypothetical LOC440918
XM_498909	LOC440900	1.874 up	hypothetical LOC440900
XM_498907	LOC284998	1.112 up	hypothetical protein LOC284998
XM_498902	LOC440864	1.065 up	hypothetical gene supported by BC040724
XM_498900	LOC646831	1.068 up	hypothetical protein LOC646831
XM_498888	LOC440848	1.032 up	hypothetical gene supported by AK093525
XM_498838	LOC440731	1.018 up	hypothetical LOC440731
XM_498826	LOC440704	1.127 down	hypothetical gene supported by BC042042
XM_498817	LOC440685	2.106 up	hypothetical gene supported by AK124550
XM_498811	LOC440669	1.097 up	hypothetical LOC440669
XM_498810	LOC440667	1.411 up	hypothetical LOC440667
XM_498747	LOC440597	1.020 down	hypothetical LOC440597
XM_498725	LOC388564	1.016 up	hypothetical gene supported by BC052596
XM_498717	LOC440525	1.025 up	hypothetical gene supported by BC016064; NM_018457
XM_498712	LOC440509	1.134 down	hypothetical LOC440509
XM_498704	LOC440498	3.181 up	hypothetical gene supported by AK001829
XM_498696	LOC440491	1.021 down	hypothetical LOC440491
XM_498678	LOC440455	1.090 down	hypothetical LOC440455
XM_498661	LOC440422	1.011 down	hypothetical LOC440422
XM_498648	LOC440389	1.193 up	hypothetical LOC440389
XM_498647	LOC440386	1.183 down	hypothetical gene supported by BC029817
XM_498638	LOC440356	1.147 down	hypothetical gene supported by AK131031; BC070380
XM_498632	LOC440335	1.064 down	hypothetical gene supported by BC022385; BC035868; BC048326
XM_498631	LOC440334	1.020 up	hypothetical LOC440334
XM_498627	LOC440315	1.152 down	hypothetical LOC440315
XM_498623	LOC440309	1.244 up	hypothetical LOC440309
XM_498617	LOC440291	1.067 down	hypothetical LOC440291
XM_498610	LOC440277	1.114 down	hypothetical LOC440277
XM_498578	C14orf82	2.249 up	chromosome 14 open reading frame 82
XM_498563	FLJ31945	1.049 up	hypothetical gene supported by AK056507
XM_498540	LOC440092	1.141 down	hypothetical gene supported by BC035168
XM_498537	LOC440084	1.101 up	hypothetical LOC440084
XM_498529	LOC440069	none	hypothetical LOC440069
XM_498513	DKFZp686K1684	1.068 down	hypothetical gene supported by BX648962
XM_498491	LOC439994	1.315 up	hypothetical gene supported by AF064843; AK025716
XM_498479	LOC439962	1.027 up	hypothetical LOC439962
XM_498469	LOC283970	1.065 up	hypothetical protein LOC283970
XM_498431	BICC1	2.492 up	bicaudal C homolog 1 (Drosophila)
XM_498429	FLJ13195	1.294 up	stromal antigen 3-like
XM_498427	NBPF1	1.362 up	neuroblastoma breakpoint family, member 1
XM_498409	LOC442480	1.012 down	similar to testis specific protein, Y-linked 1
XM_498392	LOC139363	1.002 up	similar to melanoma antigen family A, 10
XM_498390	LOC442465	1.013 up	similar to sarcoma antigen 1
XM_498389	LOC139587	1.046 down	similar to sarcoma antigen 1
XM_498387	LOC392542	1.030 down	similar to NACHT-, LRR- and PYD-containing protein 7 (PYRIN-containing APAF1-like protein 3)
XM_498379	LOC442461	1.068 down	similar to H2B histone family, member W, testis-specific
XM_498354	LOC139604	1.008 down	similar to melanoma antigen family B, 18
XM_498350	LOC645013	1.048 up	similar to 60S ribosomal protein L14 (CAG-ISL 7)
XM_498334	LOC442428	1.124 down	similar to fructose-1,6-bisphosphatase 2
XM_498333	LOC442427	1.221 up	hypothetical LOC442427
XM_498330	LOC442424	1.170 down	similar to a disintegrin and metalloprotease domain 3 (cyritestin)
XM_498329	LOC442423	1.121 down	similar to Ig kappa chain V-I region HK101 precursor
XM_498328	LOC392345	1.529 down	similar to Zinc finger protein 85 (Zinc finger protein HPF4) (HTF1)
XM_498307	LOC442406	1.602 up	similar to Keratin, type I cytoskeletal 18 (Cytokeratin-18) (CK-18) (Keratin-18) (K18)
XM_498284	LOC442388	1.018 down	similar to epidermal retinal dehydrogenase 2
XM_498275	LOC442382	1.149 down	similar to Plasma membrane calcium-transporting ATPase 1 (PMCA1) (Plasma membrane calcium pump isoform 1) (Plasma membrane calcium ATPase isoform 1)
XM_498242	CLEC2L	1.122 down	C-type lectin domain family 2, member L
XM_498233	LOC442720	1.008 up	similar to Eukaryotic translation initiation factor 3 subunit 2 (eIF-3 beta) (eIF3 p36) (eIF3i) (TGF-beta receptor-interacting protein 1) (TRIP-1)
XM_498229	IRS3L	1.100 up	insulin receptor substrate 3-like
XM_498224	LOC442710	1.004 up	similar to EF-hand calcium binding domain 1
XM_498220	LOC442329	1.036 up	similar to PMS1 protein homolog 2 (DNA mismatch repair protein PMS2)
XM_498207	LOC442316	1.059 down	similar to putative G-protein coupled receptor
XM_498195	CDC14C	1.123 up	CDC14 cell division cycle 14 homolog C (S. cerevisiae)
XM_498170	LOC442285	1.106 up	hypothetical LOC442285
XM_498162	LOC653429	1.036 up	similar to unc-93 homolog A
XM_498146	LOC442261	1.025 down	similar to Coiled-coil-helix-coiled-coil-helix domain containing protein 2 (HCV NS2 trans-regulated protein) (NS2TP)
XM_498135	LOC442251	1.096 down	similar to ribosomal protein L30
XM_498129	LOC442245	1.242 down	glutathione S-transferase M1 pseudogene
XM_498110	LOC442227	1.228 down	similar to eukaryotic translation elongation factor 1 beta 2
XM_498091	LOC442208	1.010 up	similar to 40S ribosomal protein S2
XM_498088	LOC442204	1.563 up	similar to myosin regulatory light chain-like
XM_498063	LOC222699	1.005 down	transducer of ERBB2, 2 pseudogene
XM_498032	LOC442150	1.230 down	hypothetical LOC442150
XM_498012	LOC402221	1.031 up	similar to actin alpha 1 skeletal muscle protein
XM_497990	LOC391730	1.025 up	hypothetical LOC391730
XM_497963	LOC402175	1.202 down	hypothetical gene supported by AF044957; NM_004547
XM_497952	LOC391609	1.029 up	similar to mucin 17
XM_497949	LOC391599	1.174 up	similar to Cytochrome P450 2F2 (CYPIIF2) (Naphthalene dehydrogenase) (Naphthalene hydroxylase) (P450-NAH-2)
XM_497945	LOC442096	1.040 down	similar to Kruppel-like factor 7 (ubiquitous)
XM_497942	LOC402145	1.050 down	similar to A-kinase anchor protein 150 (AKAP 150) (cAMP-dependent protein kinase regulatory subunit II high affinity binding protein) (P150)
XM_497913	LOC344875	1.043 down	similar to alpha 3 type VI collagen isoform 1 precursor
XM_497898	LOC442065	1.182 down	similar to zinc finger protein 207
XM_497897	LOC442064	1.077 up	hypothetical LOC442064
XM_497892	LOC442060	1.153 down	Sin3A-associated protein, 18kDa pseudogene
XM_497889	LOC442057	1.003 up	similar to Ciliary dynein heavy chain 11 (Axonemal beta dynein heavy chain 11)
XM_497877	LOC391444	1.002 down	hypothetical LOC391444
XM_497865	LOC645046	1.694 up	similar to putative scaffolding protein POSH
XM_497859	LOC402096	1.013 down	similar to chromosome 6 open reading frame 106 isoform a
XM_497844	LOC442020	1.024 down	similar to CXXC finger 6
XM_497837	LOC442015	1.027 up	similar to Ferritin heavy chain (Ferritin H subunit) (Proliferation-inducing gene 15 protein)
XM_497788	LOC441969	1.378 down	similar to Ribosome biogenesis protein BMS1 homolog
XM_497783	LOC441964	1.232 up	similar to sperm protein SSP411
XM_497781	LOC391276	1.561 down	similar to THUMP domain containing 1
XM_497769	LOC644280	1.088 up	hypothetical protein LOC644280
XM_497740	LOC441925	1.084 up	similar to Beclin-1 (Coiled-coil myosin-like BCL2-interacting protein)
XM_497731	LOC441920	1.015 down	similar to F-box only protein 25 isoform 2
XM_497719	LOC391124	1.146 down	similar to 60S ribosomal protein L27a
XM_497717	LOC127150	1.032 down	similar to serum amyloid P component precursor
XM_497712	LOC441907	1.034 down	similar to 60S ribosomal protein L6 (TAX-responsive enhancer element binding protein 107) (TAXREB107) (Neoplasm-related protein C140)
XM_497711	LOC653604	1.064 down	similar to H3 histone, family 2 isoform 2
XM_497679	LOC127406	1.077 down	similar to laminin receptor 1 (ribosomal protein SA)
XM_497671	LOC391037	1.087 down	similar to dystonia 2, torsion (autosomal recessive)
XM_497657	LOC441876	1.076 down	similar to 40S ribosomal protein S16
XM_497655	LOC653622	1.049 up	similar to PRAME family member 8
XM_497654	LOC441874	1.003 up	similar to PRAME family member 1
XM_497653	LOC441873	1.004 up	similar to PRAME family member 9
XM_497650	LOC441870	none	similar to oogenesin 2
XM_497648	LOC441869	1.151 up	similar to Ankyrin-1 (Erythrocyte ankyrin)
XM_497642	LOC441864	1.022 up	similar to osteoclast-associated receptor isoform 5
XM_497639	LOC441861	1.074 down	similar to zinc finger protein 613 isoform 1
XM_497623	LOC441847	1.120 up	similar to zinc finger protein 239 (predicted)
XM_497615	LOC441843	1.019 down	hypothetical LOC441843
XM_497590	LOC390856	1.183 down	similar to 60S ribosomal protein L29 (P23)
XM_497579	LOC441812	1.201 down	similar to Kinase suppressor of ras-1 (Kinase suppressor of ras)
XM_497558	LOC124512	1.057 down	hypothetical protein LOC124512
XM_497556	LOC390811	1.323 down	similar to polymerase (RNA) III (DNA directed) polypeptide K
XM_497554	LOC441799	1.069 down	similar to Keratin, type I cytoskeletal 18 (Cytokeratin-18) (CK-18) (Keratin-18) (K18)
XM_497547	LOC441795	1.070 down	similar to high-mobility group box 3
XM_497545	KRTAP4-3	1.048 down	keratin associated protein 4-3
XM_497540	LOC441792	1.284 down	similar to Nitric oxide synthase, inducible (NOS type II) (Inducible NOS) (iNOS) (Hepatocyte NOS) (HEP-NOS)
XM_497534	LOC401876	1.002 down	similar to 40S ribosomal protein S16
XM_497517	LOC441773	1.009 up	similar to Group X secretory phospholipase A2 precursor (Phosphatidylcholine 2-acylhydrolase GX) (GX sPLA2) (sPLA2-X)
XM_497514	LOC441771	1.096 up	similar to metallothionein 1G
XM_497512	LOC441770	1.059 down	similar to Neuronal acetylcholine receptor protein, beta-4 subunit precursor (Neuronal acetylcholine receptor non-alpha-2 chain) (N-alpha 2)
XM_497494	LOC441755	1.198 down	similar to Kinase suppressor of ras-1 (Kinase suppressor of ras) (mKSR1) (Hb protein)
XM_497491	LOC441752	1.069 down	similar to Hsp90 co-chaperone Cdc37 (Hsp90 chaperone protein kinase-targeting subunit) (p50Cdc37)
XM_497474	LOC441737	1.114 down	similar to hect domain and RLD 2
XM_497472	LOC441735	1.052 down	similar to hypothetical protein DKFZp434I1020
XM_497450	LOC441722	1.160 up	similar to Splicing factor U2AF 35 kDa subunit (U2 auxiliary factor 35 kDa subunit) (U2 snRNP auxiliary factor small subunit)
XM_497423	LOC441698	1.156 up	similar to RAP2C, member of RAS oncogene family
XM_497406	LOC441682	1.018 down	hypothetical LOC441682
XM_497386	LOC441666	1.303 down	similar to Zinc finger protein 85 (Zinc finger protein HPF4) (HTF1)
XM_497367	LOC390386	1.057 down	similar to Iroquois-class homeodomain protein IRX-1 (Iroquois homeobox protein 1) (Homeodomain protein IRXA1)
XM_497366	LOC441655	1.034 down	similar to inositol 1,3,4,5,6-pentakisphosphate 2-kinase
XM_497365	LOC390378	1.008 down	similar to peptidylprolyl isomerase A isoform 1
XM_497357	LOC390364	1.005 down	similar to ribosomal protein L10
XM_497352	LOC283412	1.208 down	similar to 60S ribosomal protein L29 (Cell surface heparin binding protein HIP)
XM_497341	LOC642613	1.023 down	similar to mucin 19
XM_497335	LOC441632	1.105 down	similar to ribosomal protein L13a
XM_497334	TSPAN11	1.037 up	tetraspanin 11
XM_497310	LOC441617	1.067 down	similar to trophoblast glycoprotein
XM_497272	LOC401677	1.119 down	similar to eukaryotic translation elongation factor 1 alpha 2
XM_497258	LOC441584	1.476 down	similar to Ssu72 RNA polymerase II CTD phosphatase homolog
XM_497256	LOC285444	1.039 down	similar to CG8443-PA
XM_497239	LOC441568	1.076 up	similar to hydroxysteroid dehydrogenase like 2
XM_497238	LOC338586	1.010 down	similar to hydroxysteroid dehydrogenase like 2
XM_497216	LOC441551	1.016 down	similar to patched domain containing 3
XM_497197	LOC642547	1.225 down	similar to chromosome Y open reading frame 16
XM_497193	LOC642358	1.041 up	similar to chromosome Y open reading frame 16
XM_497160	LOC441518	1.234 up	similar to mammalian retrotransposon derived 8b
XM_497141	LOC441511	1.138 up	similar to mitofusin 1 isoform 1
XM_497133	LOC441506	1.096 down	similar to laminin receptor 1 (ribosomal protein SA)
XM_497100	LOC441490	1.027 up	similar to ferritin, heavy polypeptide-like 17
XM_497098	LOC441488	1.513 down	similar to Transcription factor Dp-1 (E2F dimerization partner 1) (DRTF1-polypeptide-1) (DRTF1)
XM_497095	LOC441486	1.352 down	similar to 40S ribosomal protein S26
XM_497089	CNTNAP3B	1.702 down	contactin associated protein-like 3B
XM_497080	KIAA0515	1.364 up	KIAA0515
XM_497072	LOC389787	1.006 down	similar to Translationally-controlled tumor protein (TCTP) (p23) (Histamine-releasing factor) (HRF) (Fortilin)
XM_497062	LOC441448	1.468 down	similar to chromosome 9 open reading frame 36
XM_497054	LOC653458	1.254 down	similar to Ribosome biogenesis protein BMS1 homolog
XM_497044	RP11-146D12.2	2.121 down	ankyrin repeat domain protein 18A pseudogene
XM_497029	LOC441408	1.252 down	hypothetical LOC441408
XM_497021	rab1c	1.220 up	small GTP-binding protein
XM_497014	LOC441395	1.687 down	hypothetical LOC441395
XM_497010	FLJ35282	1.180 up	similar to mariner transposase
XM_496991	LOC441377	1.391 down	similar to 40S ribosomal protein S26
XM_496985	REXO1L7P	1.473 down	REX1, RNA exonuclease 1 homolog (S. cerevisiae)-like 7 (pseudogene)
XM_496984	REXO1L2P	1.506 down	REX1, RNA exonuclease 1 homolog (S. cerevisiae)-like 2 (pseudogene)
XM_496983	REXO1L5P	1.466 down	REX1, RNA exonuclease 1 homolog (S. cerevisiae)-like 5 (pseudogene)
XM_496981	REXO1L3P	1.283 down	REX1, RNA exonuclease 1 homolog (S. cerevisiae)-like 3 (pseudogene)
XM_496974	LOC441347	1.501 down	similar to family with sequence similarity 9, member C
XM_496973	PLEKHA2	1.060 up	pleckstrin homology domain containing, family A (phosphoinositide binding specific) member 2
XM_496972	LOC441344	1.057 down	similar to Sorting nexin-5
XM_496968	LOC653727	1.290 down	similar to zinc finger protein 2 isoform 2
XM_496966	N/A	1.361 down
XM_496963	FLJ10661	1.773 down	similar to CG7889-PA
XM_496961	FAM90A12	1.066 down	family with sequence similarity 90, member A12
XM_496960	FAM90A11P	1.070 down	family with sequence similarity 90, member A11 pseudogene
XM_496959	ZNF705B	1.179 down	zinc finger protein 705B
XM_496957	FAM90A10	1.090 down	family with sequence similarity 90, member A10
XM_496956	FAM90A9	1.099 down	family with sequence similarity 90, member A9
XM_496955	LOC441326	1.027 up	hypothetical LOC441326
XM_496952	LOC441323	1.040 down	hypothetical LOC441323
XM_496950	LOC441320	1.042 down	chromosome 11 open reading frame2 pseudogene
XM_496948	FAM90A7	1.092 down	family with sequence similarity 90, member A7
XM_496947	FAM90A5	1.084 down	family with sequence similarity 90, member A5
XM_496946	LOC441314	1.018 down	hypothetical LOC441314
XM_496945	FAM90A4	1.009 down	family with sequence similarity 90, member A4
XM_496933	LOC441296	1.212 up	similar to CTAGE family, member 5
XM_496919	LOC441284	2.402 down	hypothetical LOC441284
XM_496917	LOC441282	1.014 up	similar to aldo-keto reductase family 1, member B10
XM_496907	PEG10	1.220 down	paternally expressed 10
XM_496905	LOC653431	1.040 up	similar to hypothetical LOC441257
XM_496899	LOC441258	1.113 up	similar to Williams Beuren syndrome chromosome region 19
XM_496890	LOC441246	1.164 down	similar to 60S ribosomal protein L35
XM_496879	ZNF716	1.080 down	zinc finger protein 716
XM_496855	LOC442511	2.690 up	similar to notch1-induced protein
XM_496852	LOC441196	1.278 up	similar to zinc finger protein 655 isoform a
XM_496847	LOC645700	1.208 down	similar to zinc finger protein 16 isoform 1
XM_496836	LOC653482	1.015 up	similar to hypothetical gene supported by AK055887; AK125190
XM_496826	NHSL1	1.226 up	NHS-like 1
XM_496819	TBX18	1.332 up	T-box 18
XM_496818	LOC441161	1.062 up	hypothetical LOC441161
XM_496814	LOC441155	1.090 up	similar to Zinc finger CCCH-type domain containing protein 11A
XM_496810	RP11-444E17.5	3.351 down	similar to expressed sequence AW125688
XM_496799	LOC441135	1.022 down	similar to Nuclear envelope pore membrane protein POM 121 (Pore membrane protein of 121 kDa) (P145)
XM_496798	LOC166994	1.357 down	integral membrane glycoprotein-like
XM_496791	C6orf88	1.056 down	chromosome 6 open reading frame 88
XM_496783	LOC441114	1.021 down	ribosomal protein, large, P0 pseudogene
XM_496775	LOC441107	1.041 down	hypothetical LOC441107
XM_496769	LOC441098	1.271 down	similar to nuclear pore membrane protein 121
XM_496743	LOC441068	1.348 up	hypothetical LOC441068
XM_496741	LOC441066	1.056 down	similar to Beta-glucuronidase precursor
XM_496738	LOC441061	1.071 down	similar to membrane-associated ring finger (C3HC4) 4
XM_496731	LOC441056	2.081 down	similar to double homeobox, 4
XM_496726	LOC285500	1.024 down	hypothetical protein LOC285500
XM_496724	NBLA00301	1.016 up	putative protein product of Nbla00301
XM_496721	LOC441050	1.259 down	similar to unactive progesterone receptor, 23 kD
XM_496711	LOC441032	1.006 down	similar to eukaryotic translation elongation factor 1 alpha 1
XM_496707	FLJ12993	1.072 down	hypothetical LOC441027
XM_496704	MGC10646	3.324 up	hypothetical protein MGC10646
XM_496697	LOC441018	1.247 down	similar to UDP-glucuronosyltransferase 2B7 precursor (UDPGT) (3,4-catechol estrogen specific) (UDPGTh-2)
XM_496693	LOC441016	1.052 up	similar to hypertension-related calcium-regulated gene
XM_496688	LOC152573	3.459 down	hypothetical protein BC012029
XM_496673	LOC653534	1.194 up	similar to septin 8
XM_496672	LOC653340	1.657 up	similar to hypothetical gene supported by AK024248; AL137733
XM_496668	LOC440992	1.181 down	40S ribosomal protein S20 pseudogene
XM_496664	C3orf55	1.262 up	chromosome 3 open reading frame 55
XM_496663	LOC440981	1.084 down	similar to CG32056-PA, isoform A
XM_496659	LOC440978	1.122 up	similar to alpha 3 type VI collagen isoform 1 precursor
XM_496653	LOC643103	1.107 down	similar to Ephrin type-A receptor 6 precursor (Tyrosine-protein kinase receptor EHK-2) (EPH homology kinase 2)
XM_496652	LOC285216	1.047 down	hypothetical protein LOC285216
XM_496650	LOC440970	1.163 down	similar to MUF1 protein
XM_496644	LOC440957	1.336 down	similar to CG32736-PA
XM_496643	LOC440956	1.052 up	similar to IQ motif containing F4
XM_496634	LOC344787	1.029 up	similar to zinc finger protein 611
XM_496622	FLJ40411	1.118 up	FLJ40411 protein
XM_496618	LOC440934	1.015 up	hypothetical gene supported by BC008048
XM_496612	LOC440927	1.077 down	similar to ribosomal protein P1 isoform 2
XM_496603	LOC440917	1.190 down	similar to 14-3-3 protein epsilon (14-3-3E) (Mitochondrial import stimulation factor L subunit) (MSF L)
XM_496597	LOC440910	1.846 down	hypothetical protein LOC440910
XM_496584	LOC644781	1.147 down	similar to hypothetical gene supported by AK127288; AY343901
XM_496582	LOC440895	1.378 up	similar to LIM and senescent cell antigen-like domains 3
XM_496581	RGPD4	1.422 up	RANBP2-like and GRIP domain containing 4
XM_496558	LOC440871	1.139 up	similar to Ig kappa chain V-III region VH precursor
XM_496547	LOC339778	1.015 down	hypothetical protein LOC339778
XM_496546	KBTBD9	1.429 up	kelch repeat and BTB (POZ) domain containing 9
XM_496530	LOC440829	1.055 up	similar to transmembrane protein 46
XM_496527	FLJ20464	1.038 down	hypothetical protein FLJ20464
XM_496502	DKFZP434P211	1.269 down	POM121-like protein
XM_496493	LOC440792	1.449 down	proline dehydrogenase (oxidase) 1 pseudogene
XM_496488	LOC440786	1.126 up	similar to Ig kappa chain
XM_496483	LOC440776	2.936 down	hypothetical LOC440776
XM_496481	LOC653224	1.661 up	similar to F-box only protein 25 isoform 2
XM_496476	C20orf123	1.055 down	chromosome 20 open reading frame 123
XM_496446	LOC440737	1.147 down	similar to 60S ribosomal protein L35
XM_496442	LOC440733	1.137 down	similar to 40S ribosomal protein S15 (RIG protein)
XM_496441	LOC440732	1.154 down	similar to 40S ribosomal protein S7 (S8)
XM_496438	LOC653487	1.073 up	similar to FLJ44060 protein
XM_496436	RP11-378J18.4	1.082 up	C219-reactive peptide
XM_496428	LOC440706	1.101 up	similar to titin isoform N2-A
XM_496399	NBPF12	1.213 up	neuroblastoma breakpoint family, member 12
XM_496394	N/A	1.423 up
XM_496391	NBPF9	1.403 up	neuroblastoma breakpoint family, member 9
XM_496379	LOC401957	1.166 down	hypothetical gene supported by AK001388
XM_496374	LOC440595	1.007 down	similar to eukaryotic translation elongation factor 1 alpha 2
XM_496363	LOC440589	1.020 down	similar to ribosomal protein S2
XM_496362	LOC440587	1.040 down	similar to 60S ribosomal protein L6 (TAX-responsive enhancer element binding protein 107) (TAXREB107) (Neoplasm-related protein C140)
XM_496360	LOC440585	1.100 up	hypothetical LOC440585
XM_496355	LOC440577	1.521 down	similar to nucleophosmin 1 isoform 2
XM_496351	MGC12760	1.034 down	hypothetical protein MGC12760
XM_496348	LOC440567	1.536 down	similar to Ubiquinol-cytochrome c reductase complex 11 kDa protein, mitochondrial precursor (Mitochondrial hinge protein) (Cytochrome C1, nonheme 11 kDa protein) (Complex III subunit VIII)
XM_496344	LOC440563	1.033 down	similar to Heterogeneous nuclear ribonucleoprotein C-like dJ845O24.4 (hnRNP core protein C-like)
XM_496342	PRAMEF10	1.045 down	PRAME family member 10
XM_496333	FAM41C	1.068 down	family with sequence similarity 41, member C
XM_496331	LOC440551	1.179 up	hypothetical LOC440551
XM_496330	LOC440550	1.264 up	hypothetical LOC440550
XM_496322	LOC388559	1.038 up	similar to zinc finger protein 600
XM_496321	LOC388558	1.231 up	hypothetical gene supported by BC033230
XM_496320	ZNF534	1.027 up	zinc finger protein 534
XM_496319	LOC440539	1.176 down	similar to ribosomal protein L37
XM_496316	LOC653492	1.157 up	similar to Pregnancy-specific beta-1-glycoprotein 8 precursor (PSBG-8)
XM_496302	LOC440518	1.087 up	similar to Golgi autoantigen, golgin subfamily a, 2
XM_496289	LOC126075	1.121 up	hypothetical protein LOC126075
XM_496278	ZNF516	2.031 up	zinc finger protein 516
XM_496277	GTSCR1	1.034 down	Gilles de la Tourette syndrome chromosome region, candidate 1
XM_496269	DKFZp686J0529	1.227 down	hypothetical protein DKFZp686J0529
XM_496261	KRTAP2-2	1.015 down	keratin associated protein 2-2
XM_496251	LOC653056	1.190 up	similar to hypothetical gene supported by AK024248; AL137733
XM_496237	LOC440456	2.015 up	similar to pleckstrin homology domain containing, family M (with RUN domain) member 1; adapter protein 162
XM_496223	LOC440438	1.092 down	similar to spergen-3
XM_496217	LOC339287	1.049 down	hypothetical protein LOC339287
XM_496214	LOC653118	1.576 up	similar to aminopeptidase puromycin sensitive
XM_496207	SLFN14	1.024 down	schlafen family member 14
XM_496206	SLFN5	1.086 down	schlafen 5
XM_496203	SUZ12P	1.460 down	suppressor of zeste 12 homolog pseudogene
XM_496202	LOC440421	2.325 up	similar to keratin 17
XM_496191	FAM106B	1.175 up	family with sequence similarity 106, member B
XM_496183	LOC440402	1.034 down	hypothetical LOC440402
XM_496177	LOC440396	1.088 up	similar to Heterogeneous nuclear ribonucleoprotein A1 (Helix-destabilizing protein) (Single-strand binding protein) (hnRNP core protein A1) (HDP-1) (Topoisomerase-inhibitor suppressed)
XM_496150	LOC653547	1.062 down	similar to hect domain and RLD 2
XM_496148	LOC440364	1.023 up	hypothetical LOC440364
XM_496146	LOC647141	1.159 down	similar to hect (homologous to the E6-AP (UBE3A) carboxyl terminus) domain and RCC1 (CHC1)-like domain (RLD) 2
XM_496145	LOC440361	1.026 down	similar to Ig heavy chain V-III region VH26 precursor
XM_496143	LOC440359	1.038 down	similar to muscle Y-box protein YB2
XM_496136	DKFZp547E087	1.019 up	hypothetical gene LOC283846
XM_496129	LOC283970	1.065 up	hypothetical protein LOC283970
XM_496125	LOC440345	1.003 up	hypothetical protein LOC440345
XM_496115	LOC440338	1.185 up	hypothetical gene supported by AJ002784
XM_496112	LOC653650	1.276 up	similar to 3-phosphoinositide dependent protein kinase 1 (hPDK1)
XM_496111	NPW	1.026 up	neuropeptide W
XM_496109	LOC440330	1.165 up	hypothetical LOC440330
XM_496089	LOC440302	1.160 up	hypothetical LOC440302
XM_496078	LOC440292	1.023 down	similar to COMM domain containing 4
XM_496074	LOC440287	1.120 down	similar to COMM domain containing 4
XM_496071	LOC440280	1.244 up	similar to CCR4-NOT transcription complex, subunit 6-like isoform 1
XM_496070	UNC13C	1.159 down	unc-13 homolog C (C. elegans)
XM_496063	LOC440268	1.004 down	hypothetical LOC440268
XM_496062	LOC440266	1.162 down	similar to GM88 autoantigen isoform c
XM_496061	LOC646025	1.029 down	hypothetical protein LOC646025
XM_496059	MGC131512	1.007 down	hypothetical LOC440261
XM_496056	LOC642397	1.025 up	similar to junction-mediating and regulatory protein
XM_496054	DKFZP434L187	1.188 up	DKFZP434L187 protein
XM_496050	WHDC1L2	1.180 up	WAS protein homology region 2 domain containing 1-like 2
XM_496049	LOC653720	1.159 down	similar to golgi autoantigen, golgin family member
XM_496037	LOC440233	1.261 down	similar to cis-Golgi matrix protein GM130
XM_496034	LOC653717	1.044 up	similar to hect domain and RLD 2
XM_496030	LOC440226	1.016 up	similar to breast cancer anti-estrogen resistance 1
XM_496025	VSIG7	1.121 down	V-set and immunoglobulin domain containing 7
XM_495961	RP11-11C5.2	1.163 down	similar to RIKEN cDNA 2410129H14
XM_495939	KIAA1545	1.175 up	KIAA1545 protein
XM_495937	LOC653197	1.079 down	similar to hypothetical protein FLJ33915
XM_495926	LOC440105	1.099 down	hypothetical LOC440105
XM_495921	MUC19	1.567 up	mucin 19, oligomeric
XM_495917	OVOS2	1.116 down	ovostatin 2
XM_495908	DDX12	2.006 down	DEAD/H (Asp-Glu-Ala-Asp/His) box polypeptide 12 (CHL1-like helicase homolog, S. cerevisiae)
XM_495907	LOC440080	1.409 down	similar to cDNA sequence BC048546
XM_495898	LOC440067	1.234 down	similar to caspase 1 isoform alpha precursor
XM_495891	LOC440059	1.034 down	similar to surface glycoprotein, Ig superfamily member
XM_495888	DKFZp434E1119	1.100 down	hypothetical protein DKFZp434E1119
XM_495886	RNF169	1.236 down	ring finger protein 169
XM_495885	LOC440055	1.247 down	similar to ribosomal protein S12
XM_495883	LOC440053	1.303 down	similar to zinc finger protein 75
XM_495879	LOC440043	1.179 down	similar to Phosphoglycerate mutase 1 (Phosphoglycerate mutase isozyme B) (PGAM-B) (BPG-dependent PGAM 1)
XM_495878	MGC3196	1.353 down	hypothetical protein MGC3196
XM_495877	HNRPUL2	1.010 up	heterogeneous nuclear ribonucleoprotein U-like 2
XM_495874	LOC440041	1.602 down	similar to tripartite motif protein 39
XM_495873	LOC440040	1.281 down	similar to Metabotropic glutamate receptor 5 precursor (mGluR5)
XM_495868	LOC283278	1.879 up	hypothetical protein LOC283278
XM_495863	GVIN1	1.005 up	GTPase, very large interferon inducible 1
XM_495860	MUC5AC	1.145 up	mucin 5AC, oligomeric mucus/gel-forming
XM_495856	LOC440015	1.162 down	similar to double homeobox, 4
XM_495848	LOC440001	1.301 down	rcRPE
XM_495839	LOC439992	1.161 down	similar to ribosomal protein S3a
XM_495830	LOC653468	1.028 up	similar to centaurin, gamma-like family, member 1
XM_495814	RP11-38L15.1	1.479 down	similar to family with sequence similarity 35, member A
XM_495807	LOC338579	1.264 down	hypothetical protein LOC338579
XM_495805	LOC439957	1.034 down	similar to Ig kappa chain V-I region Walker precursor
XM_495794	LOC439945	1.198 down	similar to Interleukin-9 receptor precursor (IL-9R) (CD129 antigen)
XM_380146	FLJ43663	1.541 up	hypothetical protein FLJ43663
XM_380121	LOC402538	1.389 up	hypothetical LOC402538
XM_380103	FLJ45340	1.361 up	hypothetical gene supported by AK127273
XM_380040	LOC402693	1.061 up	similar to tubulin, beta, 2
XM_380008	LOC402665	1.707 down	similar to opioid binding protein/cell adhesion molecule-like
XM_379967	SSPO	1.011 up	SCO-spondin homolog (Bos taurus)
XM_379906	LOC441259	1.007 up	similar to postmeiotic segregation increased 2-like 2
XM_379904	MUC12	1.000 down	mucin 12, cell surface associated
XM_379897	LOC402571	1.060 down	similar to gap junction protein, epsilon 1, 29kDa
XM_379843	LOC401351	1.084 up	hypothetical gene supported by BC040831
XM_379840	LOC402509	1.497 down	similar to solute carrier family 29 (nucleoside transporters), member 4
XM_379839	LOC402508	1.184 up	hypothetical LOC402508
XM_379817	MGC13098	1.201 up	hypothetical protein MGC13098
XM_379722	LOC401616	1.021 down	hypothetical gene supported by AK057519
XM_379694	LOC401577	1.002 down	hypothetical gene supported by AK125149
XM_379668	LOC286208	1.080 down	hypothetical protein LOC286208
XM_379665	C9orf109	1.001 down	chromosome 9 open reading frame 109
XM_379664	C9orf110	1.018 down	chromosome 9 open reading frame 110
XM_379656	C9orf130	1.234 up	chromosome 9 open reading frame 130
XM_379650	LOC340515	1.061 up	hypothetical protein LOC340515
XM_379623	FLJ41200	1.052 down	hypothetical gene supported by AK123194
XM_379582	LOC286177	1.151 down	hypothetical protein LOC286177
XM_379543	LOC401442	1.005 up	hypothetical gene supported by BC028401
XM_379520	LOC647017	1.468 up	hypothetical protein LOC647017
XM_379517	LOC401399	2.868 up	hypothetical gene supported by BC063892
XM_379506	LOC402560	2.292 up	hypothetical LOC402560
XM_379495	LOC401358	1.079 down	similar to zinc finger protein 595
XM_379483	LOC401321	1.031 up	hypothetical LOC401321
XM_379482	LOC401320	1.212 up	hypothetical LOC401320
XM_379479	LOC401317	1.006 down	hypothetical LOC401317
XM_379477	LOC285941	1.162 up	hypothetical protein LOC285941
XM_379454	LOC401284	1.001 down	hypothetical gene supported by AK095077
XM_379432	LOC285733	1.049 down	hypothetical protein LOC285733
XM_379424	LOC401268	1.050 up	hypothetical LOC401268
XM_379398	FLJ22536	1.302 up	hypothetical locus LOC401237
XM_379386	LOC285768	none	hypothetical protein LOC285768
XM_379380	LOC401222	1.210 down	hypothetical gene supported by BC036933
XM_379378	LOC401220	1.048 down	hypothetical gene supported by BC036933
XM_379325	LOC401180	1.775 down	hypothetical LOC401180
XM_379324	LOC340113	1.094 down	hypothetical protein LOC340113
XM_379309	LOC285577	1.073 up	hypothetical protein LOC285577
XM_379298	LOC401164	1.059 down	hypothetical gene supported by AY494056
XM_379273	FLJ14186	1.013 up	hypothetical gene supported by AK024248; AL137733
XM_379270	CSN1S2A	none	casein alpha s2-like A
XM_379262	FLJ16686	1.008 up	FLJ16686 protein
XM_379250	LOC401115	1.076 up	hypothetical gene supported by BC038466; BC062790
XM_379234	LOC401101	1.007 up	hypothetical LOC401101
XM_379228	LOC401093	1.008 up	hypothetical LOC401093
XM_379215	LOC132241	1.415 up	hypothetical protein LOC132241
XM_379203	LOC348801	2.021 down	hypothetical protein LOC348801
XM_379194	LOC401068	1.028 down	hypothetical gene supported by BC028186
XM_379183	LOC152024	1.013 up	hypothetical protein LOC152024
XM_379180	LOC401056	1.257 down	hypothetical LOC401056
XM_379114	LOC150577	1.020 up	hypothetical protein LOC150577
XM_379100	LOC400958	1.041 down	hypothetical gene supported by BC037562
XM_379096	FLJ30838	1.053 down	hypothetical gene supported by AL832565
XM_379079	FLJ12334	1.043 down	hypothetical gene supported by AK022396; AK097927
XM_379078	FLJ41481	1.178 up	hypothetical gene supported by AK123475
XM_379036	LOC400890	1.011 up	hypothetical LOC400890
XM_379029	LOC400879	1.168 down	hypothetical gene supported by AK096951
XM_378973	LOC284801	1.546 down	hypothetical protein LOC284801
XM_378914	KIAA0492	1.400 up	KIAA0492 protein
XM_378908	FLJ13137	1.688 down	hypothetical gene supported by AK125122
XM_378883	LOC400768	1.043 up	hypothetical gene supported by BC051808
XM_378876	LOC149351	1.012 down	hypothetical protein LOC149351
XM_378874	FLJ27354	1.168 up	hypothetical gene supported by AK130864
XM_378866	LOC199899	1.110 down	hypothetical protein LOC199899
XM_378861	LOC400752	1.095 down	hypothetical gene supported by BC006119
XM_378859	LOC400751	1.079 up	hypothetical gene supported by BC031250
XM_378848	C1orf79	1.291 down	chromosome 1 open reading frame 79
XM_378787	LOC284395	1.004 up	hypothetical protein LOC284395
XM_378783	LOC400680	3.258 down	hypothetical gene supported by AK097381; BC040866
XM_378753	LOC400655	1.079 down	hypothetical gene supported by BC013370; BC034583
XM_378742	FLJ45994	1.037 down	hypothetical gene supported by AK127888
XM_378687	C17orf67	1.122 up	chromosome 17 open reading frame 67
XM_378661	C17orf51	1.010 down	chromosome 17 open reading frame 51
XM_378655	LOC96597	1.032 down	hypothetical protein LOC96597
XM_378606	LOC283867	1.070 down	hypothetical protein LOC283867
XM_378589	LOC283914	1.048 down	hypothetical protein LOC283914
XM_378546	LOC145820	1.081 down	hypothetical protein LOC145820
XM_378545	LOC400456	1.228 up	hypothetical gene supported by BC040875
XM_378544	LOC283682	1.003 down	hypothetical protein LOC283682
XM_378523	LOC400388	1.004 down	hypothetical LOC400388
XM_378517	MGC15885	1.049 down	hypothetical protein MGC15885
XM_378507	LOC145845	1.257 up	hypothetical protein LOC145845
XM_378472	LOC400236	1.143 down	hypothetical LOC400236
XM_378462	FLJ22447	1.276 up	hypothetical gene supported by AK026100
XM_378454	LOC283547	1.043 down	hypothetical protein LOC283547
XM_378436	LOC400163	1.007 up	hypothetical gene supported by BC034786
XM_378399	LOC400099	1.049 up	hypothetical gene supported by BC024195
XM_378390	LOC144678	1.056 down	hypothetical protein LOC144678
XM_378379	LOC283432	1.065 down	hypothetical protein LOC283432
XM_378350	LOC400027	1.041 up	hypothetical gene supported by BC047417
XM_378349	LOC400019	1.051 up	hypothetical LOC400019
XM_378325	LOC399978	1.039 up	hypothetical gene supported by BC031979
XM_378312	LOC283143	1.936 up	hypothetical protein LOC283143
XM_378238	LOC283050	1.081 up	hypothetical protein LOC283050
XM_378228	LOC643564	1.031 down	hypothetical protein LOC643564
XM_378223	RP11-144G6.7	1.084 up	hypothetical protein LOC399753
XM_378211	LOC254312	1.541 up	hypothetical protein LOC254312
XM_378207	LOC338588	1.051 down	hypothetical protein LOC338588
XM_378184	KIAA1383	1.011 up	KIAA1383
XM_378090	LOC402382	1.031 down	similar to collagen, type I, alpha 2
XM_378080	LOC402377	1.453 down	similar to UDP-Gal:betaGlcNAc beta 1,3-galactosyltransferase, polypeptide 4
XM_378044	LOC642673	1.234 up	similar to C34G6.1
XM_377997	LOC402716	1.007 down	similar to 60S ribosomal protein L32
XM_377958	LOC402679	1.134 down	similar to Serine/threonine-protein kinase MARK2 (MAP/microtubule affinity-regulating kinase 2) (ELKL motif kinase) (EMK1) (PAR1 homolog)
XM_377955	ANKIB1	1.098 up	ankyrin repeat and IBR domain containing 1
XM_377947	LOC402670	1.232 up	similar to opposite strand transcription unit to Stag3
XM_377945	LOC402279	1.109 down	similar to glutamate receptor, metabotropic 8
XM_377943	LOC402275	2.329 down	similar to Limbic system-associated membrane protein precursor (LSAMP)
XM_377941	LOC402269	1.036 down	similar to solute carrier family 29 (nucleoside transporters), member 4
XM_377934	LOC402644	1.016 down	similar to peptidylprolyl isomerase A isoform 1
XM_377926	LOC402634	1.070 up	similar to mesenchymal stem cell protein DSC92 isoform 2
XM_377884	LOC402207	1.279 down	similar to Transcription initiation factor TFIID subunit 11 (Transcription initiation factor TFIID 28 kDa subunit) (TAF(II)28) (TAFII-28) (TAFII28) (TFIID subunit p30-beta)
XM_377875	LOC402199	1.195 down	similar to Transcription initiation factor TFIID subunit 11 (Transcription initiation factor TFIID 28 kDa subunit) (TAF(II)28) (TAFII-28) (TAFII28) (TFIID subunit p30-beta)
XM_377830	LOC653442	1.264 down	similar to deubiquitinating enzyme 3
XM_377828	LOC402160	1.073 up	hypothetical LOC402160
XM_377783	LOC402117	1.112 up	hypothetical LOC402117
XM_377761	LOC402100	1.183 down	similar to 60S ribosomal protein L22 (Heparin binding protein HBp15)
XM_377756	LOC402095	1.025 down	similar to ribosomal protein S21
XM_377725	LOC402066	1.113 up	hypothetical LOC402066
XM_377720	RP4-756G23.1	1.366 down	hypothetical protein BC012882
XM_377716	LOC402057	1.087 down	similar to 40S ribosomal protein S17
XM_377696	LOC402036	1.045 down	similar to carbonic anhydrase 15
XM_377630	gm127	1.024 down	similar to RIKEN 2610020C11
XM_377579	LOC401945	1.012 up	similar to proline-rich proteoglycan 2
XM_377538	LOC401923	1.036 up	hypothetical LOC401923
XM_377529	LOC401915	1.104 down	similar to zinc finger protein 607
XM_377527	LOC401911	1.130 down	similar to 60S ribosomal protein L29 (Cell surface heparin binding protein HIP)
XM_377521	LOC401904	1.159 down	similar to 60S ribosomal protein L23a
XM_377506	EMR4	1.046 up	egf-like module containing, mucin-like, hormone receptor-like 4
XM_377500	LOC401895	1.125 down	similar to 40S ribosomal protein S15 (RIG protein)
XM_377446	LOC401861	1.231 up	hypothetical LOC401861
XM_377445	LOC401860	1.066 up	similar to double homeobox 4c
XM_377426	LOC401845	1.065 down	similar to Ig heavy chain V-II region SESS precursor
XM_377343	LOC401778	1.237 up	similar to SERTA domain containing 4
XM_377230	LOC401703	1.452 down	similar to Splicing factor U2AF 35 kDa subunit (U2 auxiliary factor 35 kDa subunit) (U2 snRNP auxiliary factor small subunit)
XM_377136	LOC401650	1.688 down	similar to double homeobox 4c
XM_377073	FAM39A	1.209 down	family with sequence similarity 39, member A
XM_377041	LOC286467	1.439 down	hypothetical protein LOC286467
XM_376905	LOC645419	1.421 up	similar to Multiple EGF-like-domain protein 5 precursor (Multiple epidermal growth factor-like domains 9)
XM_376903	KIAA0674	1.275 up	KIAA0674
XM_376902	SNX30	1.716 up	sorting nexin family member 30
XM_376869	LOC401525	1.116 down	similar to CDK2-associated protein 2
XM_376843	LOC653444	1.793 down	similar to hypothetical protein MGC21881
XM_376830	KIAA0258	1.495 up	KIAA0258
XM_376822	LOC401497	1.270 down	similar to PRO2738
XM_376821	C9orf14	1.112 up	chromosome 9 open reading frame 14
XM_376814	MGC13005	1.200 up	hypothetical protein MGC13005
XM_376795	FLJ45872	1.083 down	FLJ45872 protein
XM_376787	RPS26P10	1.386 down	ribosomal protein S26 pseudogene 10
XM_376784	REXO1L6P	1.480 down	REX1, RNA exonuclease 1 homolog (S. cerevisiae)-like 6 (pseudogene)
XM_376783	C8orf59	1.075 down	chromosome 8 open reading frame 59
XM_376720	LOC643641	1.654 up	similar to Zinc finger protein 74 (hZNF7)
XM_376680	KIAA1718	1.231 up	KIAA1718 protein
XM_376679	FLJ25778	1.173 down	hypothetical protein FLJ25778
XM_376677	LOC155006	1.018 down	hypothetical protein LOC155006
XM_376655	LOC402569	1.040 down	similar to Importin alpha-2 subunit (Karyopherin alpha-2 subunit) (SRP1-alpha) (RAG cohort protein 1)
XM_376618	LOC401356	2.082 up	similar to CG31151-PB, isoform B
XM_376607	LOC401335	1.014 down	FLJ44108 protein
XM_376602	FLJ21767	1.317 up	hypothetical protein FLJ21767
XM_376576	LOC401308	1.192 down	heat shock 70kDa protein 8 pseudogene
XM_376573	LOC401305	2.323 down	similar to beta-1,4-mannosyltransferase
XM_376567	KIAA1856	5.729 up	KIAA1856 protein
XM_376558	LOC653463	1.061 up	similar to hypothetical gene supported by AK127120
XM_376550	GPR178	1.111 up	G protein-coupled receptor 178
XM_376469	FLJ23152	1.010 up	hypothetical gene supported by AK026805
XM_376463	MGC39372	1.466 up	hypothetical protein MGC39372
XM_376454	AACSL	1.317 down	acetoacetyl-CoA synthetase-like
XM_376444	LOC133491	1.119 down	hypothetical protein LOC133491
XM_376436	LOC134466	1.027 down	hypothetical protein LOC134466
XM_376433	SPINK5L3	1.100 up	serine protease inhibitor
XM_376423	FLJ44606	1.094 down	hypothetical gene supported by AK126569
XM_376420	LOC401206	1.260 down	similar to 40S ribosomal protein S25
XM_376412	KIAA0825	1.002 up	KIAA0825 protein
XM_376372	LOC134121	1.167 down	hypothetical protein LOC134121
XM_376342	LOC644162	1.088 down	similar to septin 7
XM_376334	FLJ43963	1.053 down	similar to hypothetical protein
XM_376310	ZCCHC4	1.226 up	zinc finger, CCHC domain containing 4
XM_376305	DUB3	1.211 down	deubiquitinating enzyme 3
XM_376303	LOC285484	1.163 down	hypothetical protein LOC285484
XM_376284	C3orf50	1.139 down	chromosome 3 open reading frame 50
XM_376281	LOC401097	1.031 up	Similar to LOC166075
XM_376278	METT5D2	1.170 up	methyltransferase 5 domain containing 2
XM_376269	LOC401089	3.530 up	FLJ43329 protein
XM_376267	LOC401087	1.009 up	hypothetical LOC401087
XM_376247	LOC401074	1.100 up	hypothetical LOC401074
XM_376233	IQCF3	1.109 down	IQ motif containing F3
XM_376212	LOC339862	1.020 up	hypothetical protein LOC339862
XM_376186	LOC93463	1.339 up	hypothetical protein LOC93463
XM_376179	LOC401034	1.079 up	hypothetical LOC401034
XM_376154	LOC401019	1.220 down	similar to 40S ribosomal protein S15 (RIG protein)
XM_376111	PLGLA1	1.513 up	plasminogen-like A1
XM_376062	KIAA1155	2.272 down	KIAA1155 protein
XM_376056	FLJ42562	1.371 up	similar to echinoderm microtubule associated protein like 5
XM_376043	LOC400948	1.064 up	similar to CG33774-PA
XM_376018	KIAA1644	3.323 down	KIAA1644 protein
XM_375929	LOC400856	1.155 down	hypothetical gene supported by AK123815
XM_375928	LOC400855	1.003 up	similar to IQ motif and Sec7 domain 3
XM_375845	LOC400807	1.108 up	hypothetical LOC400807
XM_375838	TATDN3	1.138 down	TatD DNase domain containing 3
XM_375806	DENND4B	1.569 down	DENN/MADD domain containing 4B
XM_375729	C1orf34	1.679 down	chromosome 1 open reading frame 34
XM_375667	LOC400723	1.273 up	hypothetical LOC400723
XM_375665	LOC116412	1.030 down	hypothetical protein BC012365
XM_375664	LOC400721	2.004 down	similar to Zinc finger protein 418
XM_375646	ZNF525	1.183 down	zinc finger protein 525
XM_375632	LOC400708	1.095 down	similar to Serine/threonine protein phosphatase 5 (PP5) (Protein phosphatase T) (PP-T) (PPT)
XM_375590	LOC400682	1.156 down	similar to zinc finger protein 100
XM_375568	HSZFP36	1.265 up	ZFP-36 for a zinc finger protein
XM_375550	SHC2	1.722 up	SHC (Src homology 2 domain containing) transforming protein 2
XM_375543	LOC400652	1.177 down	similar to 40S ribosomal protein S3a
XM_375500	MGC16597	1.478 down	similar to RIKEN cDNA 3110023B02
XM_375443	LOC284100	1.074 up	hypothetical protein LOC284100
XM_375430	LOC201229	1.074 up	hypothetical protein LOC201229
XM_375378	DKFZp434O0320	1.036 down	hypothetical protein DKFZp434O0320
XM_375359	BEAN	2.625 up	brain expressed, associated with Nedd4
XM_375358	Klkbl4	1.069 down	plasma kallikrein-like protein 4
XM_375307	FLJ41766	1.059 up	similar to hypothetical protein
XM_375185	FMN1	1.080 down	formin 1
XM_375163	LOC400320	1.158 down	similar to Golgi autoantigen, golgin subfamily A member 2 (Golgi matrix protein GM130)
XM_375153	LOC653735	1.096 up	similar to similar to cDNA sequence BC021523
XM_375152	GOLGA8C	1.395 down	golgi autoantigen, golgin subfamily a, 8C
XM_375150	LOC400301	1.789 down	similar to protein kinase CHK2 isoform b
XM_375099	LOC283585	1.142 down	hypothetical protein LOC283585
XM_375090	FLJ44817	1.030 up	similar to pleckstrin homology domain protein (5V327)
XM_375067	LOC400197	1.006 down	similar to peroxisomal short-chain alcohol dehydrogenase
XM_375033	LOC144776	1.105 down	hypothetical protein LOC144776
XM_375007	LOC400093	1.156 down	hypothetical gene supported by AK123815
XM_374987	LOC400055	1.177 down	similar to 60S ribosomal protein L26 (Silica-induced gene 20 protein) (SIG-20)
XM_374983	KIAA0748	1.011 up	KIAA0748
XM_374920	LOC399940	1.614 down	similar to tripartite motif protein 39
XM_374919	LOC399939	1.323 down	similar to RING finger protein 18 (Testis-specific ring-finger protein)
XM_374917	LOC399937	1.701 down	similar to RING finger protein 18 (Testis-specific ring-finger protein)
XM_374912	XRRA1	1.201 down	X-ray radiation resistance associated 1
XM_374904	LOC653621	1.084 up	similar to SH3 and multiple ankyrin repeat domains protein 2 (Shank2) (Proline-rich synapse associated protein 1) (ProSAP1) (Cortactin-binding protein 1) (CortBP1) (GKAP/SAPAP interacting protein) (SPANK-3)
XM_374898	PCNXL3	1.109 up	pecanex-like 3 (Drosophila)
XM_374880	LOC399888	1.024 down	hypothetical gene supported by BC065704
XM_374852	LOC399839	2.165 down	similar to double homeobox 4c
XM_374836	LOC399815	1.017 down	similar to chromosome 10 open reading frame 88; Em:AC073585.5
XM_374817	FAM22B	1.154 up	family with sequence similarity 22, member B
XM_374787	C10orf21	1.026 down	chromosome 10 open reading frame 21
XM_374768	USP6NL	1.012 up	USP6 N-terminal like
XM_374767	DKFZp667F0711	1.268 up	hypothetical protein DKFZp667F0711
XM_374766	LOC399715	1.120 up	FLJ46311 protein
XM_374765	C10orf18	1.092 down	chromosome 10 open reading frame 18
XM_374705	LOC393078	1.028 down	similar to polycystic kidney disease 1 like 3
XM_374655	LOC442726	1.077 down	similar to ribosomal protein S17
XM_374637	LOC442606	3.125 down	similar to Zinc-alpha-2-glycoprotein precursor (Zn-alpha-2-glycoprotein) (Zn-alpha-2-GP)
XM_374586	LOC392843	1.046 down	similar to IQ motif containing with AAA domain
XM_374460	LOC442590	1.181 up	similar to Williams Beuren syndrome chromosome region 19
XM_374386	LOC392617	1.106 up	similar to slit homolog 1
XM_374379	LOC392583	1.007 down	hypothetical LOC392583
XM_374367	LOC391727	1.511 down	hypothetical LOC391727
XM_374352	LOC390367	1.115 down	hypothetical LOC390367
XM_374276	LOC389676	1.037 up	hypothetical LOC389676
XM_374275	LOC389671	1.070 down	hypothetical LOC389671
XM_374273	LOC389669	1.006 up	hypothetical LOC389669
XM_374260	LOC389641	1.095 down	hypothetical gene supported by AK124295
XM_374200	LOC389457	1.031 down	hypothetical protein LOC389457
XM_374190	LOC389442	1.131 up	hypothetical LOC389442
XM_374179	RP11-487F23.3	1.017 down	hypothetical LOC389422
XM_374162	LOC389370	1.116 down	hypothetical LOC389370
XM_374161	LOC389369	1.026 down	hypothetical LOC389369
XM_374142	LOC389333	1.371 down	hypothetical LOC389333
XM_374137	LOC389328	1.002 down	hypothetical LOC389328
XM_374132	LOC389316	1.041 up	hypothetical LOC389316
XM_374124	LOC389300	1.016 down	hypothetical LOC389300
XM_374088	LOC389230	1.066 down	hypothetical LOC389230
XM_374058	FLJ40759	1.029 up	hypothetical gene supported by AK098078
XM_374046	LOC389142	1.077 down	hypothetical LOC389142
XM_374037	FLJ32997	1.030 up	hypothetical LOC389105
XM_374022	LOC389070	1.060 up	hypothetical LOC389070
XM_374020	LOC375295	1.105 down	hypothetical gene supported by BC013438
XM_374012	LOC389043	1.042 up	hypothetical gene supported by AK125982; BC042817
XM_374010	LOC389033	1.023 up	hypothetical LOC389033
XM_374003	LOC389024	1.317 up	hypothetical LOC389024
XM_373985	LOC388948	1.021 down	hypothetical gene supported by BC062774
XM_373979	LOC388938	1.091 up	hypothetical LOC388938
XM_373973	LOC388923	1.148 up	hypothetical LOC388923
XM_373949	LOC388885	1.167 up	similar to 40S ribosomal protein S10
XM_373945	LOC388849	1.088 up	hypothetical LOC388849
XM_373930	LOC388820	1.230 up	hypothetical gene supported by BC049386
XM_373926	LOC388814	2.276 up	hypothetical LOC388814
XM_373925	LOC388813	1.565 down	hypothetical LOC388813
XM_373914	LOC388796	1.711 down	hypothetical LOC388796
XM_373908	LOC388789	1.041 up	hypothetical gene supported by AF147354
XM_373906	LOC149837	1.011 up	hypothetical protein LOC149837
XM_373904	LOC388780	1.036 up	hypothetical LOC388780
XM_373896	LOC388755	1.036 down	hypothetical LOC388755
XM_373850	MGC27382	1.031 down	hypothetical protein MGC27382
XM_373823	LOC388588	1.068 up	hypothetical gene supported by BC035379; BC042129
XM_373814	LOC388572	1.112 up	hypothetical LOC388572
XM_373809	LOC388553	1.096 up	hypothetical LOC388553
XM_373788	LOC388494	1.840 down	hypothetical gene supported by AL365406; BC034005
XM_373780	LOC388481	1.085 up	hypothetical LOC388481
XM_373772	TTMA	1.189 up	hypothetical LOC388459
XM_373763	LOC388436	1.387 down	hypothetical gene supported by BC058012
XM_373742	MGC40489	1.453 up	hypothetical protein MGC40489
XM_373704	LOC388312	1.213 up	hypothetical gene supported by AK128780
XM_373691	LOC388283	1.045 down	hypothetical LOC388283
XM_373690	LOC388282	1.549 up	hypothetical gene supported by AF452719; BC041062
XM_373688	LOC388279	1.148 down	hypothetical gene supported by AF275804
XM_373685	LOC388276	1.021 down	hypothetical LOC388276
XM_373627	PLA2G4E	1.105 up	phospholipase A2, group IVE
XM_373626	LOC388114	1.115 up	hypothetical LOC388114
XM_373600	LOC388002	1.010 down	hypothetical LOC388002
XM_373572	LOC387941	2.002 down	hypothetical LOC387941
XM_373571	LOC387940	1.122 down	hypothetical LOC387940
XM_373570	LOC387939	1.118 down	hypothetical LOC387939
XM_373566	LOC387931	1.077 down	hypothetical LOC387931
XM_373553	LOC387895	1.010 down	hypothetical gene supported by BC040060
XM_373547	LOC387885	1.030 down	hypothetical LOC387885
XM_373543	LOC387876	1.033 down	hypothetical LOC387876
XM_373521	LOC387826	1.059 up	hypothetical LOC387826
XM_373497	LOC387763	1.101 up	hypothetical LOC387763
XM_373496	LOC387762	1.015 up	hypothetical LOC387762
XM_373495	LOC387761	1.028 up	hypothetical LOC387761
XM_373491	LOC387756	1.011 up	hypothetical LOC387756
XM_373469	LOC387701	1.012 up	hypothetical LOC387701
XM_373463	LOC387686	1.051 up	hypothetical LOC387686
XM_373461	LOC387683	1.125 down	hypothetical LOC387683
XM_373453	LOC387654	1.006 up	hypothetical LOC387654
XM_373451	LOC387647	1.035 down	hypothetical gene supported by BC014163
XM_373378	LOC392559	1.154 down	similar to paraneoplastic antigen MA3
XM_373349	LOC392467	1.063 up	similar to Melanoma-associated antigen 1 (MAGE-1 antigen) (Antigen MZ2-E)
XM_373347	LOC392465	1.135 up	hypothetical LOC392465
XM_373343	LOC392447	1.035 down	similar to 60S ribosomal protein L32
XM_373340	MAGEB6B	1.059 up	melanoma antigen family B, 6B
XM_373338	LOC392425	1.104 down	similar to ubiquitin and ribosomal protein S27a precursor
XM_373277	LOC392288	1.032 up	similar to microtubule-associated proteins 1A/1B light chain 3
XM_373266	LOC392275	1.354 down	similar to Sphingomyelin phosphodiesterase 3 (Neutral sphingomyelinase 2) (Neutral sphingomyelinase II) (nSMase2) (nSMase-2)
XM_373263	LOC392262	1.009 down	similar to 40S ribosomal protein SA (p40) (34/67 kDa laminin receptor)
XM_373253	LOC392222	1.001 up	similar to UPF0315 protein
XM_373252	LOC392221	1.025 up	similar to Coiled-coil-helix-coiled-coil-helix domain containing protein 2 (HCV NS2 trans-regulated protein) (NS2TP)
XM_373243	LOC392197	1.170 down	similar to deubiquitinating enzyme 3
XM_373238	LOC392188	1.235 down	similar to deubiquitinating enzyme 3
XM_373233	LOC392179	1.018 up	similar to 60S ribosomal protein L10 (QM protein) (Tumor suppressor QM) (Laminin receptor homolog)
XM_373214	LOC392145	1.061 down	similar to Mtr3 (mRNA transport regulator 3)-homolog
XM_373106	LOC391859	1.059 up	similar to Probable coiled-coil domain containing protein 8 homolog
XM_373094	LOC391817	1.007 up	similar to peptidase (prosome, macropain) 26S subunit, ATPase 1
XM_373080	LOC391770	1.069 down	similar to H3 histone, family 3B
XM_373079	LOC391769	1.085 down	similar to HIStone family member (his-72)
XM_373078	LOC391767	1.031 down	similar to Transcription initiation factor TFIID subunit 11 (Transcription initiation factor TFIID 28 kDa subunit) (TAF(II)28) (TAFII-28) (TAFII28) (TFIID subunit p30-beta)
XM_373077	LOC391766	1.163 down	similar to Transcription initiation factor TFIID subunit 11 (Transcription initiation factor TFIID 28 kDa subunit) (TAF(II)28) (TAFII-28) (TAFII28) (TFIID subunit p30-beta)
XM_373076	LOC391764	1.039 down	similar to TAF11 RNA polymerase II, TATA box binding protein (TBP)-associated factor
XM_373075	LOC391763	1.100 down	similar to Transcription initiation factor TFIID subunit 11 (Transcription initiation factor TFIID 28 kDa subunit) (TAF(II)28) (TAFII-28) (TAFII28) (TFIID subunit p30-beta)
XM_373073	LOC391761	1.098 down	similar to Transcription initiation factor TFIID subunit 11 (Transcription initiation factor TFIID 28 kDa subunit) (TAF(II)28) (TAFII-28) (TAFII28) (TFIID subunit p30-beta)
XM_373061	LOC391749	1.266 down	similar to Transcription initiation factor TFIID subunit 11 (Transcription initiation factor TFIID 28 kDa subunit) (TAF(II)28) (TAFII-28) (TAFII28) (TFIID subunit p30-beta)
XM_373059	LOC391747	1.311 down	similar to Transcription initiation factor TFIID subunit 11 (Transcription initiation factor TFIID 28 kDa subunit) (TAF(II)28) (TAFII-28) (TAFII28) (TFIID subunit p30-beta)
XM_373058	LOC391746	1.221 down	similar to Transcription initiation factor TFIID subunit 11 (Transcription initiation factor TFIID 28 kDa subunit) (TAF(II)28) (TAFII-28) (TAFII28) (TFIID subunit p30-beta)
XM_373057	LOC391745	1.220 down	similar to Transcription initiation factor TFIID subunit 11 (Transcription initiation factor TFIID 28 kDa subunit) (TAF(II)28) (TAFII-28) (TAFII28) (TFIID subunit p30-beta)
XM_373056	LOC391742	1.084 down	similar to Transcription initiation factor TFIID subunit 11 (Transcription initiation factor TFIID 28 kDa subunit) (TAF(II)28) (TAFII-28) (TAFII28) (TFIID subunit p30-beta)
XM_373042	LOC391722	1.069 up	similar to myosin regulatory light chain-like
XM_373039	TRIM75	1.108 down	tripartite motif-containing 75
XM_373031	LOC391692	1.024 down	similar to tubulin, beta 8
XM_373030	LOC285556	1.011 up	hypothetical protein LOC285556
XM_373027	LOC391656	1.043 down	similar to ribosomal protein S15a
XM_372996	LOC391555	1.891 down	similar to hydrocephalus inducing
XM_372995	LOC391553	1.823 down	similar to spen homolog, transcriptional regulator
XM_372984	LOC391509	1.145 up	hypothetical LOC391509
XM_372969	LOC391475	1.018 down	similar to F15D3.1a
XM_372954	LOC391429	1.356 down	hypothetical LOC391429
XM_372952	LOC391427	1.071 down	similar to Ig kappa chain V-I region Walker precursor
XM_372941	LOC391405	1.006 up	similar to Ig kappa chain V-I region Walker precursor
XM_372940	LOC391403	1.011 up	similar to Gamma-glutamyltranspeptidase 1 precursor (Gamma-glutamyltransferase 1) (CD224 antigen)
XM_372926	LOC391370	1.167 down	similar to ribosomal protein S12
XM_372922	LOC391359	1.014 up	similar to Epithelial membrane protein 2 (EMP-2) (XMP protein)
XM_372921	LOC391358	1.058 up	similar to UPF0315 protein AD-001
XM_372917	LOC391353	1.070 down	hypothetical LOC391353
XM_372916	LOC391352	1.044 up	similar to peptidylprolyl isomerase A isoform 1
XM_372900	LOC391322	1.111 down	similar to D-dopachrome tautomerase (Phenylpyruvate tautomerase II)
XM_372878	LOC391282	1.002 down	similar to 60S ribosomal protein L23a
XM_372876	LOC391269	1.347 down	similar to ankyrin repeat domain 20 family, member A2
XM_372838	LOC391205	1.051 down	hypothetical LOC391205
XM_372816	LOC391169	1.252 down	hypothetical LOC391169
XM_372815	LOC391165	5.047 up	similar to 40S ribosomal protein S26
XM_372792	LOC391092	1.286 down	hypothetical LOC391092
XM_372780	LOC391045	1.476 up	similar to Solute carrier family 2, facilitated glucose transporter member 3 (Glucose transporter type 3, brain)
XM_372775	LOC391025	1.030 up	similar to protein tyrosine phosphatase, receptor type, U isoform 2 precursor
XM_372769	RP3-340N1.3	1.035 up	similar to Group IIC secretory phospholipase A2 precursor (Phosphatidylcholine 2-acylhydrolase GIIC) (GIIC sPLA2) (PLA2-8) (14 kDa phospholipase A2)
XM_372760	LOC390999	1.005 up	similar to Hypothetical protein DJ1198H6.2
XM_372759	LOC390998	1.028 up	similar to 60S ribosomal protein L10 (QM protein) (Tumor suppressor QM) (Laminin receptor homolog)
XM_372755	LOC390988	1.109 up	hypothetical LOC390988
XM_372749	LOC390975	1.114 up	similar to SH3-binding kinase
XM_372741	LOC390956	1.036 down	similar to peptidylprolyl isomerase A isoform 1
XM_372730	LOC390937	1.158 up	similar to ETS domain transcription factor ERF
XM_372723	NUDT19	1.555 up	nudix (nucleoside diphosphate linked moiety X)-type motif 19
XM_372716	WIZ	1.265 up	widely-interspaced zinc finger motifs
XM_372707	LOC390880	1.229 down	similar to nuclear factor, interleukin 3 regulated
XM_372705	LOC390877	1.075 down	similar to adenylate kinase 5
XM_372704	LOC390876	1.168 down	similar to 60S ribosomal protein L35
XM_372702	LOC390874	1.091 up	similar to one cut domain, family member 3
XM_372693	LOC390846	1.095 up	similar to 27 kDa Golgi SNARE protein (Golgi SNAP receptor complex member 2) (Membrin)
XM_372668	ARL5C	1.021 up	ADP-ribosylation factor-like 5C
XM_372654	LOC390760	1.283 down	similar to protein phosphatase 1, regulatory (inhibitor) subunit 2
XM_372648	LOC390748	1.022 up	similar to poly(A)binding protein nuclear-like 1
XM_372643	LOC390738	1.116 up	similar to Transducin-like enhancer protein 2 (ESG2)
XM_372632	LOC390714	1.283 down	similar to Ig heavy chain V-III region VH26 precursor
XM_372630	LOC390712	1.153 down	similar to Ig heavy chain V-III region VH26 precursor
XM_372626	LOC390705	1.028 down	similar to protein phosphatase 2A 48 kDa regulatory subunit isoform 1; serine/threonine protein phosphatase 2A, 48kDa regulatory subunit; PP2A, subunit B, PR48 isoform; PP2A B subunit PR48; NY-REN-8 antigen
XM_372616	LOC390688	1.015 down	similar to CDC37-like gene
XM_372614	LOC390683	1.277 down	similar to NAD(P) dependent steroid dehydrogenase-like
XM_372592	LOC145814	1.004 up	hypothetical protein LOC145814
XM_372584	LOC390616	1.000 up	similar to RIKEN cDNA B230218L05 gene
XM_372579	LOC390604	1.548 down	similar to Dynamin-1 (D100) (Dynamin, brain) (B-dynamin)
XM_372574	LOC390595	1.283 up	similar to ubiquitin-associated protein 1 (predicted)
XM_372573	LOC390594	1.007 down	similar to Kelch domain containing protein 5
XM_372566	LOC390570	1.122 down	hypothetical LOC390570
XM_372562	LOC390564	1.023 down	similar to Neuronal acetylcholine receptor protein, beta-4 subunit precursor
XM_372553	LOC390547	1.029 down	similar to cholinergic receptor, nicotinic, beta polypeptide 4
XM_372543	LOC390530	1.300 down	similar to Ig heavy chain V-I region HG3 precursor
XM_372532	SERPINA2	1.024 down	serpin peptidase inhibitor, clade A (alpha-1 antiproteinase, antitrypsin), member 2
XM_372521	LOC390466	1.146 down	similar to SMT3 suppressor of mif two 3 homolog 2
XM_372498	LOC390427	1.060 down	similar to TBP-associated factor 15 isoform 1
XM_372494	LOC390414	1.045 up	similar to Nuclear envelope pore membrane protein POM 121 (Pore membrane protein of 121 kDa)
XM_372473	LOC390352	1.280 down	similar to eukaryotic translation elongation factor 1 alpha 1
XM_372472	LOC390349	1.057 down	similar to small nuclear ribonucleoprotein D2
XM_372452	LOC390299	1.083 down	similar to peptidylprolyl isomerase A isoform 1
XM_372447	LOC390282	1.092 up	similar to eukaryotic translation initiation factor 3, subunit 5 (epsilon)
XM_372433	LOC390259	1.048 up	hypothetical protein
XM_372429	LOC390245	1.076 up	similar to jumonji domain containing 2D
XM_372428	LOC390243	1.074 up	similar to folate receptor 4 (delta) isoform 1
XM_372423	LOC390231	1.197 down	similar to tripartite motif protein 17
XM_372416	LOC390205	1.077 up	similar to Serdin1
XM_372410	LOC390192	1.008 up	similar to chromosome 14 open reading frame 68
XM_372371	LOC390084	1.068 down	similar to Olfactory receptor 56A4
XM_372345	LOC390033	1.106 down	similar to Ssu72 RNA polymerase II CTD phosphatase homolog
XM_372343	LOC390031	1.351 down	similar to Ssu72 RNA polymerase II CTD phosphatase homolog
XM_372331	C10orf121	1.172 down	chromosome 10 open reading frame 121
XM_372328	LOC390006	1.191 down	similar to peptidylprolyl isomerase A isoform 1
XM_372319	LOC389983	3.089 up	similar to acyl-CoA synthetase medium-chain family member 1
XM_372311	LOC389958	1.044 down	similar to cubilin
XM_372302	tAKR	1.190 up	aldo-keto reductase, truncated
XM_372268	LOC389904	1.005 up	similar to Extracellular matrix protein 2 precursor (Matrix glycoprotein SC1/ECM2)
[truncated: 22,001 more rows]

## Sheet: Experiment 2
SEQ_ID	gene_name	Fold change	DESCRIPTION
NM_000014	A2M	1.033 down	alpha-2-macroglobulin
NM_000015	NAT2	1.059 down	N-acetyltransferase 2 (arylamine N-acetyltransferase)
NM_000016	ACADM	1.222 down	acyl-Coenzyme A dehydrogenase, C-4 to C-12 straight chain
NM_000017	ACADS	1.137 down	acyl-Coenzyme A dehydrogenase, C-2 to C-3 short chain
NM_000018	ACADVL	1.319 up	acyl-Coenzyme A dehydrogenase, very long chain
NM_000019	ACAT1	1.177 down	acetyl-Coenzyme A acetyltransferase 1 (acetoacetyl Coenzyme A thiolase)
NM_000020	ACVRL1	1.086 up	activin A receptor type II-like 1
NM_000021	PSEN1	1.672 up	presenilin 1 (Alzheimer disease 3)
NM_000022	ADA	1.284 up	adenosine deaminase
NM_000023	SGCA	1.051 down	sarcoglycan, alpha (50kDa dystrophin-associated glycoprotein)
NM_000024	ADRB2	1.163 down	adrenergic, beta-2-, receptor, surface
NM_000025	ADRB3	1.098 up	adrenergic, beta-3-, receptor
NM_000026	ADSL	1.568 down	adenylosuccinate lyase
NM_000027	AGA	1.073 up	aspartylglucosaminidase
NM_000028	AGL	1.134 down	amylo-1, 6-glucosidase, 4-alpha-glucanotransferase (glycogen debranching enzyme, glycogen storage disease type III)
NM_000029	AGT	1.034 down	angiotensinogen (serpin peptidase inhibitor, clade A, member 8)
NM_000030	AGXT	1.001 down	alanine-glyoxylate aminotransferase (oxalosis I; hyperoxaluria I; glycolicaciduria; serine-pyruvate aminotransferase)
NM_000031	ALAD	1.693 up	aminolevulinate, delta-, dehydratase
NM_000032	ALAS2	1.193 up	aminolevulinate, delta-, synthase 2 (sideroblastic/hypochromic anemia)
NM_000033	ABCD1	1.434 up	ATP-binding cassette, sub-family D (ALD), member 1
NM_000034	ALDOA	1.013 up	aldolase A, fructose-bisphosphate
NM_000035	ALDOB	1.095 up	aldolase B, fructose-bisphosphate
NM_000036	AMPD1	1.066 down	adenosine monophosphate deaminase 1 (isoform M)
NM_000037	ANK1	1.654 up	ankyrin 1, erythrocytic
NM_000038	APC	1.148 up	adenomatosis polyposis coli
NM_000039	APOA1	1.395 down	apolipoprotein A-I
NM_000040	APOC3	1.001 down	apolipoprotein C-III
NM_000041	APOE	1.220 down	apolipoprotein E
NM_000042	APOH	1.024 up	apolipoprotein H (beta-2-glycoprotein I)
NM_000043	FAS	2.646 up	Fas (TNF receptor superfamily, member 6)
NM_000044	AR	1.778 down	androgen receptor (dihydrotestosterone receptor; testicular feminization; spinal and bulbar muscular atrophy; Kennedy disease)
NM_000045	ARG1	1.079 up	arginase, liver
NM_000046	ARSB	1.130 up	arylsulfatase B
NM_000047	ARSE	1.291 down	arylsulfatase E (chondrodysplasia punctata 1)
NM_000048	ASL	1.073 up	argininosuccinate lyase
NM_000049	ASPA	1.008 down	aspartoacylase (Canavan disease)
NM_000050	ASS	1.832 down	argininosuccinate synthetase
NM_000051	ATM	1.103 down	ataxia telangiectasia mutated (includes complementation groups A, C and D)
NM_000052	ATP7A	1.283 up	ATPase, Cu++ transporting, alpha polypeptide (Menkes syndrome)
NM_000053	ATP7B	2.007 up	ATPase, Cu++ transporting, beta polypeptide
NM_000054	AVPR2	1.083 down	arginine vasopressin receptor 2 (nephrogenic diabetes insipidus)
NM_000055	BCHE	1.344 down	butyrylcholinesterase
NM_000056	BCKDHB	1.686 up	branched chain keto acid dehydrogenase E1, beta polypeptide (maple syrup urine disease)
NM_000057	BLM	2.323 down	Bloom syndrome
NM_000059	BRCA2	1.548 down	breast cancer 2, early onset
NM_000060	BTD	1.264 up	biotinidase
NM_000061	BTK	1.069 up	Bruton agammaglobulinemia tyrosine kinase
NM_000062	SERPING1	1.638 up	serpin peptidase inhibitor, clade G (C1 inhibitor), member 1, (angioedema, hereditary)
NM_000063	C2	1.011 down	complement component 2
NM_000064	C3	1.542 down	complement component 3
NM_000065	C6	1.003 up	complement component 6
NM_000066	C8B	1.031 up	complement component 8, beta polypeptide
NM_000067	CA2	1.020 up	carbonic anhydrase II
NM_000068	CACNA1A	1.190 down	calcium channel, voltage-dependent, P/Q type, alpha 1A subunit
NM_000069	CACNA1S	1.024 down	calcium channel, voltage-dependent, L type, alpha 1S subunit
NM_000070	CAPN3	1.187 up	calpain 3, (p94)
NM_000071	CBS	1.110 down	cystathionine-beta-synthase
NM_000072	CD36	1.832 down	CD36 molecule (thrombospondin receptor)
NM_000073	CD3G	1.008 up	CD3g molecule, gamma (CD3-TCR complex)
NM_000074	CD40LG	1.025 down	CD40 ligand (TNF superfamily, member 5, hyper-IgM syndrome)
NM_000075	CDK4	1.398 down	cyclin-dependent kinase 4
NM_000076	CDKN1C	2.058 up	cyclin-dependent kinase inhibitor 1C (p57, Kip2)
NM_000077	CDKN2A	2.182 up	cyclin-dependent kinase inhibitor 2A (melanoma, p16, inhibits CDK4)
NM_000078	CETP	1.097 up	cholesteryl ester transfer protein, plasma
NM_000079	CHRNA1	1.110 down	cholinergic receptor, nicotinic, alpha 1 (muscle)
NM_000080	CHRNE	1.067 up	cholinergic receptor, nicotinic, epsilon
NM_000081	LYST	1.151 up	lysosomal trafficking regulator
NM_000082	ERCC8	1.226 down	excision repair cross-complementing rodent repair deficiency, complementation group 8
NM_000083	CLCN1	1.033 up	chloride channel 1, skeletal muscle (Thomsen disease, autosomal dominant)
NM_000084	CLCN5	3.369 up	chloride channel 5 (nephrolithiasis 2, X-linked, Dent disease)
NM_000085	CLCNKB	1.050 down	chloride channel Kb
NM_000086	CLN3	1.205 up	ceroid-lipofuscinosis, neuronal 3, juvenile (Batten, Spielmeyer-Vogt disease)
NM_000087	CNGA1	1.312 up	cyclic nucleotide gated channel alpha 1
NM_000088	COL1A1	1.623 up	collagen, type I, alpha 1
NM_000089	COL1A2	5.211 up	collagen, type I, alpha 2
NM_000090	COL3A1	5.782 up	collagen, type III, alpha 1 (Ehlers-Danlos syndrome type IV, autosomal dominant)
NM_000091	COL4A3	1.114 down	collagen, type IV, alpha 3 (Goodpasture antigen)
NM_000092	COL4A4	1.087 down	collagen, type IV, alpha 4
NM_000093	COL5A1	5.585 up	collagen, type V, alpha 1
NM_000094	COL7A1	3.784 up	collagen, type VII, alpha 1 (epidermolysis bullosa, dystrophic, dominant and recessive)
NM_000095	COMP	1.075 down	cartilage oligomeric matrix protein
NM_000096	CP	1.448 down	ceruloplasmin (ferroxidase)
NM_000097	CPOX	1.114 up	coproporphyrinogen oxidase
NM_000098	CPT2	1.321 down	carnitine palmitoyltransferase II
NM_000099	CST3	1.988 up	cystatin C (amyloid angiopathy and cerebral hemorrhage)
NM_000100	CSTB	1.103 up	cystatin B (stefin B)
NM_000101	CYBA	1.660 down	cytochrome b-245, alpha polypeptide
NM_000102	CYP17A1	1.023 up	cytochrome P450, family 17, subfamily A, polypeptide 1
NM_000103	CYP19A1	1.132 down	cytochrome P450, family 19, subfamily A, polypeptide 1
NM_000104	CYP1B1	2.400 up	cytochrome P450, family 1, subfamily B, polypeptide 1
NM_000106	CYP2D6	1.034 up	cytochrome P450, family 2, subfamily D, polypeptide 6
NM_000107	DDB2	1.557 down	damage-specific DNA binding protein 2, 48kDa
NM_000108	DLD	1.084 down	dihydrolipoamide dehydrogenase (E3 component of pyruvate dehydrogenase complex, 2-oxo-glutarate complex, branched chain keto acid dehydrogenase complex)
NM_000109	DMD	1.036 up	dystrophin (muscular dystrophy, Duchenne and Becker types)
NM_000110	DPYD	1.261 up	dihydropyrimidine dehydrogenase
NM_000111	SLC26A3	1.067 down	solute carrier family 26, member 3
NM_000112	SLC26A2	1.151 down	solute carrier family 26 (sulfate transporter), member 2
NM_000113	TOR1A	1.005 up	torsin family 1, member A (torsin A)
NM_000114	EDN3	1.029 down	endothelin 3
NM_000115	EDNRB	2.450 up	endothelin receptor type B
NM_000116	TAZ	1.039 down	tafazzin (cardiomyopathy, dilated 3A (X-linked); endocardial fibroelastosis 2; Barth syndrome)
NM_000117	EMD	1.427 down	emerin (Emery-Dreifuss muscular dystrophy)
NM_000118	ENG	1.445 up	endoglin (Osler-Rendu-Weber syndrome 1)
NM_000119	EPB42	1.003 up	erythrocyte membrane protein band 4.2
NM_000120	EPHX1	1.149 down	epoxide hydrolase 1, microsomal (xenobiotic)
NM_000121	EPOR	1.171 down	erythropoietin receptor
NM_000122	ERCC3	1.056 down	excision repair cross-complementing rodent repair deficiency, complementation group 3 (xeroderma pigmentosum group B complementing)
NM_000123	ERCC5	1.382 up	excision repair cross-complementing rodent repair deficiency, complementation group 5 (xeroderma pigmentosum, complementation group G (Cockayne syndrome))
NM_000124	ERCC6	2.078 up	excision repair cross-complementing rodent repair deficiency, complementation group 6
NM_000125	ESR1	1.075 down	estrogen receptor 1
NM_000126	ETFA	1.394 up	electron-transfer-flavoprotein, alpha polypeptide (glutaric aciduria II)
NM_000127	EXT1	3.032 up	exostoses (multiple) 1
NM_000128	F11	1.207 down	coagulation factor XI (plasma thromboplastin antecedent)
NM_000129	F13A1	1.033 down	coagulation factor XIII, A1 polypeptide
NM_000130	F5	1.008 down	coagulation factor V (proaccelerin, labile factor)
NM_000131	F7	1.043 down	coagulation factor VII (serum prothrombin conversion accelerator)
NM_000132	F8	1.001 down	coagulation factor VIII, procoagulant component (hemophilia A)
NM_000133	F9	1.036 down	coagulation factor IX (plasma thromboplastic component, Christmas disease, hemophilia B)
NM_000134	FABP2	1.021 down	fatty acid binding protein 2, intestinal
NM_000135	FANCA	2.328 down	Fanconi anemia, complementation group A
NM_000136	FANCC	1.111 up	Fanconi anemia, complementation group C
NM_000137	FAH	1.003 up	fumarylacetoacetate hydrolase (fumarylacetoacetase)
NM_000138	FBN1	1.091 up	fibrillin 1 (Marfan syndrome)
NM_000139	MS4A2	1.025 down	membrane-spanning 4-domains, subfamily A, member 2 (Fc fragment of IgE, high affinity I, receptor for; beta polypeptide)
NM_000140	FECH	1.202 up	ferrochelatase (protoporphyria)
NM_000141	FGFR2	1.513 down	fibroblast growth factor receptor 2 (bacteria-expressed kinase, keratinocyte growth factor receptor, craniofacial dysostosis 1, Crouzon syndrome, Pfeiffer syndrome, Jackson-Weiss syndrome)
NM_000142	FGFR3	2.546 down	fibroblast growth factor receptor 3 (achondroplasia, thanatophoric dwarfism)
NM_000143	FH	1.082 down	fumarate hydratase
NM_000144	FXN	2.024 down	frataxin
NM_000145	FSHR	1.191 up	follicle stimulating hormone receptor
NM_000146	FTL	1.396 up	ferritin, light polypeptide
NM_000147	FUCA1	1.094 down	fucosidase, alpha-L- 1, tissue
NM_000148	FUT1	1.009 down	fucosyltransferase 1 (galactoside 2-alpha-L-fucosyltransferase, H blood group)
NM_000149	FUT3	1.159 up	fucosyltransferase 3 (galactoside 3(4)-L-fucosyltransferase, Lewis blood group)
NM_000150	FUT6	1.059 down	fucosyltransferase 6 (alpha (1,3) fucosyltransferase)
NM_000151	G6PC	1.001 down	glucose-6-phosphatase, catalytic (glycogen storage disease type I, von Gierke disease)
NM_000152	GAA	1.262 down	glucosidase, alpha; acid (Pompe disease, glycogen storage disease type II)
NM_000153	GALC	1.427 up	galactosylceramidase
NM_000154	GALK1	1.217 down	galactokinase 1
NM_000155	GALT	1.137 down	galactose-1-phosphate uridylyltransferase
NM_000156	GAMT	1.675 down	guanidinoacetate N-methyltransferase
NM_000157	GBA	1.454 up	glucosidase, beta; acid (includes glucosylceramidase)
NM_000158	GBE1	2.341 up	glucan (1,4-alpha-), branching enzyme 1 (glycogen branching enzyme, Andersen disease, glycogen storage disease type IV)
NM_000159	GCDH	1.519 down	glutaryl-Coenzyme A dehydrogenase
NM_000160	GCGR	1.031 down	glucagon receptor
NM_000161	GCH1	1.259 up	GTP cyclohydrolase 1 (dopa-responsive dystonia)
NM_000162	GCK	1.133 down	glucokinase (hexokinase 4, maturity onset diabetes of the young 2)
NM_000163	GHR	1.009 up	growth hormone receptor
NM_000164	GIPR	1.016 down	gastric inhibitory polypeptide receptor
NM_000165	GJA1	2.607 down	gap junction protein, alpha 1, 43kDa (connexin 43)
NM_000166	GJB1	1.004 up	gap junction protein, beta 1, 32kDa (connexin 32, Charcot-Marie-Tooth neuropathy, X-linked)
NM_000167	GK	1.637 down	glycerol kinase
NM_000168	GLI3	1.353 up	GLI-Kruppel family member GLI3 (Greig cephalopolysyndactyly syndrome)
NM_000169	GLA	1.074 down	galactosidase, alpha
NM_000170	GLDC	2.925 down	glycine dehydrogenase (decarboxylating; glycine decarboxylase, glycine cleavage system protein P)
NM_000171	GLRA1	1.020 up	glycine receptor, alpha 1 (startle disease/hyperekplexia, stiff man syndrome)
NM_000172	GNAT1	1.009 up	guanine nucleotide binding protein (G protein), alpha transducing activity polypeptide 1
NM_000173	GP1BA	1.222 down	glycoprotein Ib (platelet), alpha polypeptide
NM_000174	GP9	1.230 down	glycoprotein IX (platelet)
NM_000175	GPI	1.534 down	glucose phosphate isomerase
NM_000176	NR3C1	1.632 down	nuclear receptor subfamily 3, group C, member 1 (glucocorticoid receptor)
NM_000177	GSN	6.549 up	gelsolin (amyloidosis, Finnish type)
NM_000178	GSS	1.109 up	glutathione synthetase
NM_000179	MSH6	1.833 down	mutS homolog 6 (E. coli)
NM_000180	GUCY2D	1.145 down	guanylate cyclase 2D, membrane (retina-specific)
NM_000181	GUSB	1.459 down	glucuronidase, beta
NM_000182	HADHA	1.079 up	hydroxyacyl-Coenzyme A dehydrogenase/3-ketoacyl-Coenzyme A thiolase/enoyl-Coenzyme A hydratase (trifunctional protein), alpha subunit
NM_000183	HADHB	1.175 up	hydroxyacyl-Coenzyme A dehydrogenase/3-ketoacyl-Coenzyme A thiolase/enoyl-Coenzyme A hydratase (trifunctional protein), beta subunit
NM_000184	HBG2	1.057 down	hemoglobin, gamma G
NM_000185	SERPIND1	1.104 up	serpin peptidase inhibitor, clade D (heparin cofactor), member 1
NM_000186	CFH	1.054 down	complement factor H
NM_000187	HGD	1.030 up	homogentisate 1,2-dioxygenase (homogentisate oxidase)
NM_000188	HK1	1.053 up	hexokinase 1
NM_000189	HK2	1.102 down	hexokinase 2
NM_000190	HMBS	2.044 down	hydroxymethylbilane synthase
NM_000191	HMGCL	1.911 up	3-hydroxymethyl-3-methylglutaryl-Coenzyme A lyase (hydroxymethylglutaricaciduria)
NM_000192	TBX5	1.094 up	T-box 5
NM_000193	SHH	1.448 up	sonic hedgehog homolog (Drosophila)
NM_000194	HPRT1	2.388 down	hypoxanthine phosphoribosyltransferase 1 (Lesch-Nyhan syndrome)
NM_000195	HPS1	1.305 up	Hermansky-Pudlak syndrome 1
NM_000196	HSD11B2	1.865 down	hydroxysteroid (11-beta) dehydrogenase 2
NM_000197	HSD17B3	1.265 up	hydroxysteroid (17-beta) dehydrogenase 3
NM_000198	HSD3B2	1.583 up	hydroxy-delta-5-steroid dehydrogenase, 3 beta- and steroid delta-isomerase 2
NM_000199	SGSH	1.290 up	N-sulfoglucosamine sulfohydrolase (sulfamidase)
NM_000200	HTN3	1.041 down	histatin 3
NM_000201	ICAM1	1.074 down	intercellular adhesion molecule 1 (CD54), human rhinovirus receptor
NM_000202	IDS	3.280 up	iduronate 2-sulfatase (Hunter syndrome)
NM_000203	IDUA	1.239 down	iduronidase, alpha-L-
NM_000204	CFI	1.026 down	complement factor I
NM_000206	IL2RG	1.061 up	interleukin 2 receptor, gamma (severe combined immunodeficiency)
NM_000207	INS	1.052 up	insulin
NM_000208	INSR	1.501 down	insulin receptor
NM_000209	IPF1	1.010 up	insulin promoter factor 1, homeodomain transcription factor
NM_000210	ITGA6	2.113 up	integrin, alpha 6
NM_000211	ITGB2	1.873 up	integrin, beta 2 (complement component 3 receptor 3 and 4 subunit)
NM_000212	ITGB3	2.094 up	integrin, beta 3 (platelet glycoprotein IIIa, antigen CD61)
NM_000213	ITGB4	4.010 up	integrin, beta 4
NM_000214	JAG1	1.533 up	jagged 1 (Alagille syndrome)
NM_000215	JAK3	1.341 down	Janus kinase 3 (a protein tyrosine kinase, leukocyte)
NM_000216	KAL1	3.821 down	Kallmann syndrome 1 sequence
NM_000217	KCNA1	1.324 down	potassium voltage-gated channel, shaker-related subfamily, member 1 (episodic ataxia with myokymia)
NM_000218	KCNQ1	1.006 up	potassium voltage-gated channel, KQT-like subfamily, member 1
NM_000219	KCNE1	1.451 up	potassium voltage-gated channel, Isk-related family, member 1
NM_000220	KCNJ1	1.024 up	potassium inwardly-rectifying channel, subfamily J, member 1
NM_000221	KHK	1.598 down	ketohexokinase (fructokinase)
NM_000222	KIT	2.530 down	v-kit Hardy-Zuckerman 4 feline sarcoma viral oncogene homolog
NM_000223	KRT12	1.017 up	keratin 12 (Meesmann corneal dystrophy)
NM_000224	KRT18	1.020 up	keratin 18
NM_000226	KRT9	1.291 up	keratin 9 (epidermolytic palmoplantar keratoderma)
NM_000227	LAMA3	1.118 down	laminin, alpha 3
NM_000228	LAMB3	1.471 up	laminin, beta 3
NM_000229	LCAT	1.579 up	lecithin-cholesterol acyltransferase
NM_000230	LEP	1.030 up	leptin (obesity homolog, mouse)
NM_000231	SGCG	1.099 up	sarcoglycan, gamma (35kDa dystrophin-associated glycoprotein)
NM_000232	SGCB	1.102 down	sarcoglycan, beta (43kDa dystrophin-associated glycoprotein)
NM_000233	LHCGR	1.006 up	luteinizing hormone/choriogonadotropin receptor
NM_000234	LIG1	1.668 down	ligase I, DNA, ATP-dependent
NM_000235	LIPA	1.153 up	lipase A, lysosomal acid, cholesterol esterase (Wolman disease)
NM_000236	LIPC	1.010 down	lipase, hepatic
NM_000237	LPL	6.717 up	lipoprotein lipase
NM_000238	KCNH2	1.273 down	potassium voltage-gated channel, subfamily H (eag-related), member 2
NM_000239	LYZ	1.045 up	lysozyme (renal amyloidosis)
NM_000240	MAOA	1.125 down	monoamine oxidase A
NM_000242	MBL2	1.093 down	mannose-binding lectin (protein C) 2, soluble (opsonic defect)
NM_000243	MEFV	1.033 up	Mediterranean fever
NM_000244	MEN1	1.141 down	multiple endocrine neoplasia I
NM_000245	MET	1.434 up	met proto-oncogene (hepatocyte growth factor receptor)
NM_000246	CIITA	1.147 up	class II, major histocompatibility complex, transactivator
NM_000247	MICA	1.001 up	MHC class I polypeptide-related sequence A
NM_000248	MITF	1.069 down	microphthalmia-associated transcription factor
NM_000249	MLH1	1.343 down	mutL homolog 1, colon cancer, nonpolyposis type 2 (E. coli)
NM_000250	MPO	1.029 up	myeloperoxidase
NM_000251	MSH2	1.821 down	mutS homolog 2, colon cancer, nonpolyposis type 1 (E. coli)
NM_000252	MTM1	1.049 down	myotubularin 1
NM_000253	MTTP	1.392 down	microsomal triglyceride transfer protein
NM_000254	MTR	1.102 up	5-methyltetrahydrofolate-homocysteine methyltransferase
NM_000255	MUT	1.260 up	methylmalonyl Coenzyme A mutase
NM_000256	MYBPC3	1.000 up	myosin binding protein C, cardiac
NM_000257	MYH7	1.046 up	myosin, heavy polypeptide 7, cardiac muscle, beta
NM_000258	MYL3	1.149 up	myosin, light polypeptide 3, alkali; ventricular, skeletal, slow
NM_000259	MYO5A	1.994 up	myosin VA (heavy polypeptide 12, myoxin)
NM_000260	MYO7A	1.250 up	myosin VIIA
NM_000261	MYOC	1.064 down	myocilin, trabecular meshwork inducible glucocorticoid response
NM_000262	NAGA	1.130 down	N-acetylgalactosaminidase, alpha-
NM_000263	NAGLU	1.555 down	N-acetylglucosaminidase, alpha- (Sanfilippo disease IIIB)
NM_000264	PTCH	1.417 up	patched homolog (Drosophila)
NM_000265	NCF1	1.108 down	neutrophil cytosolic factor 1, (chronic granulomatous disease, autosomal 1)
NM_000266	NDP	1.010 down	Norrie disease (pseudoglioma)
NM_000267	NF1	1.350 up	neurofibromin 1 (neurofibromatosis, von Recklinghausen disease, Watson disease)
NM_000268	NF2	1.320 down	neurofibromin 2 (bilateral acoustic neuroma)
NM_000269	NME1	1.726 down	non-metastatic cells 1, protein (NM23A) expressed in
NM_000270	NP	1.257 down	nucleoside phosphorylase
NM_000271	NPC1	1.937 up	Niemann-Pick disease, type C1
NM_000272	NPHP1	1.036 down	nephronophthisis 1 (juvenile)
NM_000273	GPR143	1.157 up	G protein-coupled receptor 143
NM_000274	OAT	1.159 up	ornithine aminotransferase (gyrate atrophy)
NM_000275	OCA2	1.456 down	oculocutaneous albinism II (pink-eye dilution homolog, mouse)
NM_000276	OCRL	1.170 up	oculocerebrorenal syndrome of Lowe
NM_000277	PAH	1.065 up	phenylalanine hydroxylase
NM_000278	PAX2	1.012 down	paired box gene 2
NM_000280	PAX6	1.029 down	paired box gene 6 (aniridia, keratitis)
NM_000281	PCBD1	1.132 up	pterin-4 alpha-carbinolamine dehydratase/dimerization cofactor of hepatocyte nuclear factor 1 alpha (TCF1)
NM_000282	PCCA	1.778 down	propionyl Coenzyme A carboxylase, alpha polypeptide
NM_000283	PDE6B	1.036 down	phosphodiesterase 6B, cGMP-specific, rod, beta (congenital stationary night blindness 3, autosomal dominant)
NM_000284	PDHA1	1.167 up	pyruvate dehydrogenase (lipoamide) alpha 1
NM_000285	PEPD	1.260 down	peptidase D
NM_000286	PEX12	1.012 up	peroxisomal biogenesis factor 12
NM_000287	PEX6	1.526 up	peroxisomal biogenesis factor 6
NM_000288	PEX7	1.336 down	peroxisomal biogenesis factor 7
NM_000289	PFKM	1.268 down	phosphofructokinase, muscle
NM_000290	PGAM2	1.301 up	phosphoglycerate mutase 2 (muscle)
NM_000291	PGK1	1.159 down	phosphoglycerate kinase 1
NM_000292	PHKA2	1.029 up	phosphorylase kinase, alpha 2 (liver)
NM_000293	PHKB	1.687 up	phosphorylase kinase, beta
NM_000294	PHKG2	1.002 down	phosphorylase kinase, gamma 2 (testis)
NM_000295	SERPINA1	1.041 up	serpin peptidase inhibitor, clade A (alpha-1 antiproteinase, antitrypsin), member 1
NM_000296	PKD1	1.003 down	polycystic kidney disease 1 (autosomal dominant)
NM_000297	PKD2	1.121 up	polycystic kidney disease 2 (autosomal dominant)
NM_000298	PKLR	1.801 down	pyruvate kinase, liver and RBC
NM_000299	PKP1	1.028 up	plakophilin 1 (ectodermal dysplasia/skin fragility syndrome)
NM_000300	PLA2G2A	1.182 up	phospholipase A2, group IIA (platelets, synovial fluid)
NM_000301	PLG	1.020 up	plasminogen
NM_000302	PLOD1	1.117 up	procollagen-lysine 1, 2-oxoglutarate 5-dioxygenase 1
NM_000303	PMM2	1.148 down	phosphomannomutase 2
NM_000304	PMP22	8.277 up	peripheral myelin protein 22
NM_000305	PON2	1.597 up	paraoxonase 2
NM_000306	POU1F1	1.061 down	POU domain, class 1, transcription factor 1 (Pit1, growth hormone factor 1)
NM_000307	POU3F4	1.057 down	POU domain, class 3, transcription factor 4
NM_000308	PPGB	1.070 down	protective protein for beta-galactosidase (galactosialidosis)
NM_000309	PPOX	1.024 up	protoporphyrinogen oxidase
NM_000310	PPT1	1.578 down	palmitoyl-protein thioesterase 1 (ceroid-lipofuscinosis, neuronal 1, infantile)
NM_000311	PRNP	2.300 up	prion protein (p27-30) (Creutzfeld-Jakob disease, Gerstmann-Strausler-Scheinker syndrome, fatal familial insomnia)
NM_000312	PROC	1.008 up	protein C (inactivator of coagulation factors Va and VIIIa)
NM_000313	PROS1	1.206 up	protein S (alpha)
NM_000314	PTEN	1.008 up	phosphatase and tensin homolog (mutated in multiple advanced cancers 1)
NM_000315	PTH	1.065 down	parathyroid hormone
NM_000316	PTHR1	1.984 up	parathyroid hormone receptor 1
NM_000317	PTS	2.634 up	6-pyruvoyltetrahydropterin synthase
NM_000318	PXMP3	1.076 down	peroxisomal membrane protein 3, 35kDa (Zellweger syndrome)
NM_000319	PEX5	1.513 down	peroxisomal biogenesis factor 5
NM_000320	QDPR	1.126 up	quinoid dihydropteridine reductase
NM_000321	RB1	1.143 up	retinoblastoma 1 (including osteosarcoma)
NM_000322	RDS	1.160 up	retinal degeneration, slow
NM_000324	RHAG	1.002 up	Rh-associated glycoprotein
NM_000325	PITX2	1.103 down	paired-like homeodomain transcription factor 2
NM_000326	RLBP1	1.010 down	retinaldehyde binding protein 1
NM_000327	ROM1	1.033 down	retinal outer segment membrane protein 1
NM_000328	RPGR	1.388 down	retinitis pigmentosa GTPase regulator
NM_000329	RPE65	1.013 down	retinal pigment epithelium-specific protein 65kDa
NM_000330	RS1	1.033 up	retinoschisis (X-linked, juvenile) 1
NM_000331	SAA1	1.122 down	serum amyloid A1
NM_000332	ATXN1	4.660 up	ataxin 1
NM_000333	ATXN7	1.218 up	ataxin 7
NM_000334	SCN4A	4.637 down	sodium channel, voltage-gated, type IV, alpha
NM_000335	SCN5A	1.262 down	sodium channel, voltage-gated, type V, alpha (long QT syndrome 3)
NM_000336	SCNN1B	1.075 up	sodium channel, nonvoltage-gated 1, beta (Liddle syndrome)
NM_000337	SGCD	1.016 down	sarcoglycan, delta (35kDa dystrophin-associated glycoprotein)
NM_000338	SLC12A1	1.111 down	solute carrier family 12 (sodium/potassium/chloride transporters), member 1
NM_000339	SLC12A3	1.076 down	solute carrier family 12 (sodium/chloride transporters), member 3
NM_000340	SLC2A2	1.159 down	solute carrier family 2 (facilitated glucose transporter), member 2
NM_000341	SLC3A1	1.025 down	solute carrier family 3 (cystine, dibasic and neutral amino acid transporters, activator of cystine, dibasic and neutral amino acid transport), member 1
NM_000342	SLC4A1	1.043 up	solute carrier family 4, anion exchanger, member 1 (erythrocyte membrane protein band 3, Diego blood group)
NM_000343	SLC5A1	1.016 up	solute carrier family 5 (sodium/glucose cotransporter), member 1
NM_000344	SMN1	1.381 down	survival of motor neuron 1, telomeric
NM_000345	SNCA	1.775 up	synuclein, alpha (non A4 component of amyloid precursor)
NM_000346	SOX9	5.261 up	SRY (sex determining region Y)-box 9 (campomelic dysplasia, autosomal sex-reversal)
NM_000347	SPTB	1.117 down	spectrin, beta, erythrocytic (includes spherocytosis, clinical type I)
NM_000348	SRD5A2	1.035 down	steroid-5-alpha-reductase, alpha polypeptide 2 (3-oxo-5 alpha-steroid delta 4-dehydrogenase alpha 2)
NM_000349	STAR	1.003 down	steroidogenic acute regulator
NM_000350	ABCA4	1.926 up	ATP-binding cassette, sub-family A (ABC1), member 4
NM_000351	STS	2.741 up	steroid sulfatase (microsomal), arylsulfatase C, isozyme S
NM_000352	ABCC8	1.248 down	ATP-binding cassette, sub-family C (CFTR/MRP), member 8
NM_000353	TAT	1.024 up	tyrosine aminotransferase
NM_000354	SERPINA7	1.010 up	serpin peptidase inhibitor, clade A (alpha-1 antiproteinase, antitrypsin), member 7
NM_000355	TCN2	3.986 down	transcobalamin II; macrocytic anemia
NM_000356	TCOF1	1.321 down	Treacher Collins-Franceschetti syndrome 1
NM_000358	TGFBI	9.926 up	transforming growth factor, beta-induced, 68kDa
NM_000359	TGM1	2.612 up	transglutaminase 1 (K polypeptide epidermal type I, protein-glutamine-gamma-glutamyltransferase)
NM_000360	TH	1.101 down	tyrosine hydroxylase
NM_000361	THBD	1.066 up	thrombomodulin
NM_000362	TIMP3	4.049 up	TIMP metallopeptidase inhibitor 3 (Sorsby fundus dystrophy, pseudoinflammatory)
NM_000363	TNNI3	1.661 down	troponin I type 3 (cardiac)
NM_000364	TNNT2	2.351 up	troponin T type 2 (cardiac)
NM_000365	TPI1	1.618 down	triosephosphate isomerase 1
NM_000366	TPM1	1.354 up	tropomyosin 1 (alpha)
NM_000367	TPMT	1.004 down	thiopurine S-methyltransferase
NM_000368	TSC1	1.440 up	tuberous sclerosis 1
NM_000369	TSHR	1.110 up	thyroid stimulating hormone receptor
NM_000370	TTPA	1.158 down	tocopherol (alpha) transfer protein (ataxia (Friedreich-like) with vitamin E deficiency)
NM_000371	TTR	1.182 up	transthyretin (prealbumin, amyloidosis type I)
NM_000372	TYR	1.040 up	tyrosinase (oculocutaneous albinism IA)
NM_000373	UMPS	1.483 down	uridine monophosphate synthetase (orotate phosphoribosyl transferase and orotidine-5'-decarboxylase)
NM_000374	UROD	1.024 down	uroporphyrinogen decarboxylase
NM_000375	UROS	1.380 down	uroporphyrinogen III synthase (congenital erythropoietic porphyria)
NM_000376	VDR	1.162 up	vitamin D (1,25- dihydroxyvitamin D3) receptor
NM_000377	WAS	1.020 down	Wiskott-Aldrich syndrome (eczema-thrombocytopenia)
NM_000378	WT1	1.101 up	Wilms tumor 1
NM_000379	XDH	1.110 up	xanthine dehydrogenase
NM_000380	XPA	1.041 down	xeroderma pigmentosum, complementation group A
NM_000381	MID1	1.839 up	midline 1 (Opitz/BBB syndrome)
NM_000382	ALDH3A2	2.309 down	aldehyde dehydrogenase 3 family, member A2
NM_000383	AIRE	1.060 up	autoimmune regulator (autoimmune polyendocrinopathy candidiasis ectodermal dystrophy)
NM_000384	APOB	1.389 down	apolipoprotein B (including Ag(x) antigen)
NM_000385	AQP1	1.663 up	aquaporin 1 (Colton blood group)
NM_000386	BLMH	1.273 down	bleomycin hydrolase
NM_000387	SLC25A20	1.046 up	solute carrier family 25 (carnitine/acylcarnitine translocase), member 20
NM_000388	CASR	1.070 up	calcium-sensing receptor (hypocalciuric hypercalcemia 1, severe neonatal hyperparathyroidism)
NM_000389	CDKN1A	2.586 up	cyclin-dependent kinase inhibitor 1A (p21, Cip1)
NM_000390	CHM	1.339 up	choroideremia (Rab escort protein 1)
NM_000391	TPP1	1.420 up	tripeptidyl peptidase I
NM_000392	ABCC2	1.245 up	ATP-binding cassette, sub-family C (CFTR/MRP), member 2
NM_000393	COL5A2	2.884 up	collagen, type V, alpha 2
NM_000394	CRYAA	1.126 down	crystallin, alpha A
NM_000395	CSF2RB	1.081 down	colony stimulating factor 2 receptor, beta, low-affinity (granulocyte-macrophage)
NM_000396	CTSK	2.015 up	cathepsin K (pycnodysostosis)
NM_000397	CYBB	1.009 up	cytochrome b-245, beta polypeptide (chronic granulomatous disease)
NM_000398	CYB5R3	1.232 up	cytochrome b5 reductase 3
NM_000399	EGR2	1.038 up	early growth response 2 (Krox-20 homolog, Drosophila)
NM_000400	ERCC2	2.201 down	excision repair cross-complementing rodent repair deficiency, complementation group 2 (xeroderma pigmentosum D)
NM_000401	EXT2	1.242 up	exostoses (multiple) 2
NM_000402	G6PD	2.023 up	glucose-6-phosphate dehydrogenase
NM_000403	GALE	1.762 up	UDP-galactose-4-epimerase
NM_000404	GLB1	2.026 up	galactosidase, beta 1
NM_000405	GM2A	1.471 up	GM2 ganglioside activator
NM_000406	GNRHR	1.008 up	gonadotropin-releasing hormone receptor
NM_000407	GP1BB	1.102 down	glycoprotein Ib (platelet), beta polypeptide
NM_000408	GPD2	1.188 down	glycerol-3-phosphate dehydrogenase 2 (mitochondrial)
NM_000409	GUCA1A	1.499 down	guanylate cyclase activator 1A (retina)
NM_000410	HFE	1.041 up	hemochromatosis
NM_000411	HLCS	1.061 up	holocarboxylase synthetase (biotin-(proprionyl-Coenzyme A-carboxylase (ATP-hydrolysing)) ligase)
NM_000412	HRG	1.065 down	histidine-rich glycoprotein
NM_000413	HSD17B1	1.258 up	hydroxysteroid (17-beta) dehydrogenase 1
NM_000414	HSD17B4	1.758 down	hydroxysteroid (17-beta) dehydrogenase 4
NM_000415	IAPP	1.032 down	islet amyloid polypeptide
NM_000416	IFNGR1	1.715 up	interferon gamma receptor 1
NM_000417	IL2RA	1.072 down	interleukin 2 receptor, alpha
NM_000418	IL4R	1.705 up	interleukin 4 receptor
NM_000419	ITGA2B	1.980 down	integrin, alpha 2b (platelet glycoprotein IIb of IIb/IIIa complex, antigen CD41)
NM_000420	KEL	2.440 down	Kell blood group, metalloendopeptidase
NM_000421	KRT10	1.002 up	keratin 10 (epidermolytic hyperkeratosis; keratosis palmaris et plantaris)
NM_000422	KRT17	3.335 up	keratin 17
NM_000423	KRT2A	1.101 up	keratin 2A (epidermal ichthyosis bullosa of Siemens)
NM_000424	KRT5	1.124 up	keratin 5 (epidermolysis bullosa simplex, Dowling-Meara/Kobner/Weber-Cockayne types)
NM_000425	L1CAM	3.164 up	L1 cell adhesion molecule
NM_000426	LAMA2	1.187 up	laminin, alpha 2 (merosin, congenital muscular dystrophy)
NM_000427	LOR	1.006 up	loricrin
NM_000428	LTBP2	16.132 up	latent transforming growth factor beta binding protein 2
NM_000429	MAT1A	1.442 down	methionine adenosyltransferase I, alpha
NM_000430	PAFAH1B1	1.162 up	platelet-activating factor acetylhydrolase, isoform Ib, alpha subunit 45kDa
NM_000431	MVK	1.150 up	mevalonate kinase (mevalonic aciduria)
NM_000432	MYL2	1.121 up	myosin, light polypeptide 2, regulatory, cardiac, slow
NM_000433	NCF2	1.097 up	neutrophil cytosolic factor 2 (65kDa, chronic granulomatous disease, autosomal 2)
NM_000434	NEU1	1.578 up	sialidase 1 (lysosomal sialidase)
NM_000435	NOTCH3	1.320 down	Notch homolog 3 (Drosophila)
NM_000436	OXCT1	1.138 down	3-oxoacid CoA transferase 1
NM_000437	PAFAH2	1.618 up	platelet-activating factor acetylhydrolase 2, 40kDa
NM_000438	PAX3	1.092 up	paired box gene 3 (Waardenburg syndrome 1)
NM_000439	PCSK1	1.090 up	proprotein convertase subtilisin/kexin type 1
NM_000440	PDE6A	1.057 up	phosphodiesterase 6A, cGMP-specific, rod, alpha
NM_000441	SLC26A4	2.765 up	solute carrier family 26, member 4
NM_000442	PECAM1	1.089 up	platelet/endothelial cell adhesion molecule (CD31 antigen)
NM_000443	ABCB4	3.443 up	ATP-binding cassette, sub-family B (MDR/TAP), member 4
NM_000444	PHEX	1.172 up	phosphate regulating endopeptidase homolog, X-linked (hypophosphatemia, vitamin D resistant rickets)
NM_000445	PLEC1	1.848 up	plectin 1, intermediate filament binding protein 500kDa
NM_000446	PON1	1.017 up	paraoxonase 1
NM_000447	PSEN2	1.131 up	presenilin 2 (Alzheimer disease 4)
NM_000448	RAG1	1.201 up	recombination activating gene 1
NM_000449	RFX5	1.186 down	regulatory factor X, 5 (influences HLA class II expression)
NM_000450	SELE	1.002 up	selectin E (endothelial adhesion molecule 1)
NM_000451	SHOX	1.101 up	short stature homeobox
NM_000452	SLC10A2	1.053 up	solute carrier family 10 (sodium/bile acid cotransporter family), member 2
NM_000453	SLC5A5	1.999 down	solute carrier family 5 (sodium iodide symporter), member 5
NM_000454	SOD1	1.036 down	superoxide dismutase 1, soluble (amyotrophic lateral sclerosis 1 (adult))
NM_000455	STK11	1.047 down	serine/threonine kinase 11
NM_000456	SUOX	1.303 down	sulfite oxidase
NM_000457	HNF4A	1.637 down	hepatocyte nuclear factor 4, alpha
NM_000458	TCF2	1.607 down	transcription factor 2, hepatic; LF-B3; variant hepatic nuclear factor
NM_000459	TEK	2.585 down	TEK tyrosine kinase, endothelial (venous malformations, multiple cutaneous and mucosal)
NM_000460	THPO	1.054 down	thrombopoietin (myeloproliferative leukemia virus oncogene ligand, megakaryocyte growth and development factor)
NM_000461	THRB	2.585 up	thyroid hormone receptor, beta (erythroblastic leukemia viral (v-erb-a) oncogene homolog 2, avian)
NM_000462	UBE3A	1.262 down	ubiquitin protein ligase E3A (human papilloma virus E6-associated protein, Angelman syndrome)
NM_000463	UGT1A1	1.071 down	UDP glucuronosyltransferase 1 family, polypeptide A1
NM_000465	BARD1	1.239 down	BRCA1 associated RING domain 1
NM_000466	PEX1	1.380 down	peroxisome biogenesis factor 1
NM_000474	TWIST1	1.310 up	twist homolog 1 (acrocephalosyndactyly 3; Saethre-Chotzen syndrome) (Drosophila)
NM_000475	NR0B1	1.020 up	nuclear receptor subfamily 0, group B, member 1
NM_000476	AK1	1.025 up	adenylate kinase 1
NM_000477	ALB	1.028 up	albumin
NM_000478	ALPL	2.445 down	alkaline phosphatase, liver/bone/kidney
NM_000479	AMH	1.402 down	anti-Mullerian hormone
NM_000480	AMPD3	1.271 up	adenosine monophosphate deaminase (isoform E)
NM_000481	AMT	1.594 down	aminomethyltransferase (glycine cleavage system protein T)
NM_000482	APOA4	1.008 down	apolipoprotein A-IV
NM_000483	APOC2	1.014 up	apolipoprotein C-II
NM_000484	APP	1.307 up	amyloid beta (A4) precursor protein (peptidase nexin-II, Alzheimer disease)
NM_000485	APRT	1.651 down	adenine phosphoribosyltransferase
NM_000486	AQP2	1.066 down	aquaporin 2 (collecting duct)
NM_000487	ARSA	1.345 up	arylsulfatase A
NM_000488	SERPINC1	1.008 down	serpin peptidase inhibitor, clade C (antithrombin), member 1
NM_000489	ATRX	1.123 up	alpha thalassemia/mental retardation syndrome X-linked (RAD54 homolog, S. cerevisiae)
NM_000490	AVP	1.031 down	arginine vasopressin (neurophysin II, antidiuretic hormone, diabetes insipidus, neurohypophyseal)
NM_000491	C1QB	1.109 up	complement component 1, q subcomponent, B chain
NM_000492	CFTR	1.976 up	cystic fibrosis transmembrane conductance regulator, ATP-binding cassette (sub-family C, member 7)
NM_000493	COL10A1	1.617 down	collagen, type X, alpha 1(Schmid metaphyseal chondrodysplasia)
NM_000494	COL17A1	1.132 up	collagen, type XVII, alpha 1
NM_000495	COL4A5	2.033 up	collagen, type IV, alpha 5 (Alport syndrome)
NM_000496	CRYBB2	1.053 up	crystallin, beta B2
NM_000497	CYP11B1	1.060 up	cytochrome P450, family 11, subfamily B, polypeptide 1
NM_000498	CYP11B2	1.069 down	cytochrome P450, family 11, subfamily B, polypeptide 2
NM_000499	CYP1A1	1.653 up	cytochrome P450, family 1, subfamily A, polypeptide 1
NM_000500	CYP21A2	1.108 up	cytochrome P450, family 21, subfamily A, polypeptide 2
NM_000501	ELN	1.103 up	elastin (supravalvular aortic stenosis, Williams-Beuren syndrome)
NM_000502	EPX	1.050 up	eosinophil peroxidase
NM_000503	EYA1	2.463 up	eyes absent homolog 1 (Drosophila)
NM_000504	F10	1.575 down	coagulation factor X
NM_000505	F12	1.052 up	coagulation factor XII (Hageman factor)
NM_000506	F2	1.221 down	coagulation factor II (thrombin)
NM_000507	FBP1	1.463 up	fructose-1,6-bisphosphatase 1
NM_000508	FGA	1.005 up	fibrinogen alpha chain
NM_000509	FGG	1.002 up	fibrinogen gamma chain
NM_000510	FSHB	1.038 down	follicle stimulating hormone, beta polypeptide
NM_000511	FUT2	1.257 down	fucosyltransferase 2 (secretor status included)
NM_000512	GALNS	1.095 up	galactosamine (N-acetyl)-6-sulfate sulfatase (Morquio syndrome, mucopolysaccharidosis type IVA)
NM_000513	OPN1MW	1.078 down	opsin 1 (cone pigments), medium-wave-sensitive (color blindness, deutan)
NM_000514	GDNF	1.228 up	glial cell derived neurotrophic factor
NM_000515	GH1	1.036 up	growth hormone 1
NM_000516	GNAS	1.099 up	GNAS complex locus
NM_000517	HBA2	1.008 down	hemoglobin, alpha 2
NM_000518	HBB	1.058 down	hemoglobin, beta
NM_000519	HBD	1.017 up	hemoglobin, delta
NM_000520	HEXA	1.455 up	hexosaminidase A (alpha polypeptide)
NM_000521	HEXB	1.388 up	hexosaminidase B (beta polypeptide)
NM_000522	HOXA13	1.030 down	homeobox A13
NM_000523	HOXD13	1.040 up	homeobox D13
NM_000524	HTR1A	1.613 down	5-hydroxytryptamine (serotonin) receptor 1A
NM_000525	KCNJ11	1.132 down	potassium inwardly-rectifying channel, subfamily J, member 11
NM_000526	KRT14	2.972 up	keratin 14 (epidermolysis bullosa simplex, Dowling-Meara, Koebner)
NM_000527	LDLR	1.079 up	low density lipoprotein receptor (familial hypercholesterolemia)
NM_000528	MAN2B1	1.246 up	mannosidase, alpha, class 2B, member 1
NM_000529	MC2R	1.046 up	melanocortin 2 receptor (adrenocorticotropic hormone)
NM_000530	MPZ	1.315 down	myelin protein zero (Charcot-Marie-Tooth neuropathy 1B)
NM_000531	OTC	1.021 down	ornithine carbamoyltransferase
NM_000532	PCCB	1.390 down	propionyl Coenzyme A carboxylase, beta polypeptide
NM_000533	PLP1	10.282 down	proteolipid protein 1 (Pelizaeus-Merzbacher disease, spastic paraplegia 2, uncomplicated)
NM_000534	PMS1	1.989 down	PMS1 postmeiotic segregation increased 1 (S. cerevisiae)
NM_000535	PMS2	1.176 down	PMS2 postmeiotic segregation increased 2 (S. cerevisiae)
NM_000536	RAG2	1.029 down	recombination activating gene 2
NM_000537	REN	1.123 up	renin
NM_000538	RFXAP	1.233 up	regulatory factor X-associated protein
NM_000539	RHO	1.048 up	rhodopsin (opsin 2, rod pigment) (retinitis pigmentosa 4, autosomal dominant)
NM_000540	RYR1	2.491 down	ryanodine receptor 1 (skeletal)
NM_000541	SAG	1.042 up	S-antigen; retina and pineal gland (arrestin)
NM_000542	SFTPB	1.053 down	surfactant, pulmonary-associated protein B
NM_000543	SMPD1	2.810 up	sphingomyelin phosphodiesterase 1, acid lysosomal (acid sphingomyelinase)
NM_000544	TAP2	1.410 down	transporter 2, ATP-binding cassette, sub-family B (MDR/TAP)
NM_000545	TCF1	1.323 down	transcription factor 1, hepatic; LF-B1, hepatic nuclear factor (HNF1), albumin proximal factor
NM_000546	TP53	1.486 down	tumor protein p53 (Li-Fraumeni syndrome)
NM_000547	TPO	1.003 up	thyroid peroxidase
NM_000548	TSC2	1.377 up	tuberous sclerosis 2
NM_000549	TSHB	1.087 up	thyroid stimulating hormone, beta
NM_000550	TYRP1	1.109 down	tyrosinase-related protein 1
NM_000551	VHL	1.061 down	von Hippel-Lindau tumor suppressor
NM_000552	VWF	1.004 up	von Willebrand factor
NM_000553	WRN	1.244 down	Werner syndrome
NM_000554	CRX	1.019 up	cone-rod homeobox
NM_000555	DCX	1.348 down	doublecortex; lissencephaly, X-linked (doublecortin)
NM_000557	GDF5	1.339 down	growth differentiation factor 5 (cartilage-derived morphogenetic protein-1)
NM_000558	HBA1	1.060 up	hemoglobin, alpha 1
NM_000560	CD53	1.264 down	CD53 molecule
NM_000561	GSTM1	1.618 down	glutathione S-transferase M1
NM_000562	C8A	1.082 up	complement component 8, alpha polypeptide
NM_000564	IL5RA	1.124 up	interleukin 5 receptor, alpha
NM_000565	IL6R	1.203 down	interleukin 6 receptor
NM_000566	FCGR1A	1.038 up	Fc fragment of IgG, high affinity Ia, receptor (CD64)
NM_000567	CRP	1.053 down	C-reactive protein, pentraxin-related
NM_000569	FCGR3A	1.085 down	Fc fragment of IgG, low affinity IIIa, receptor (CD16a)
NM_000570	FCGR3B	1.032 up	Fc fragment of IgG, low affinity IIIb, receptor (CD16b)
NM_000572	IL10	1.260 down	interleukin 10
NM_000573	CR1	1.063 down	complement component (3b/4b) receptor 1 (Knops blood group)
NM_000574	CD55	1.531 up	CD55 molecule, decay accelerating factor for complement (Cromer blood group)
NM_000575	IL1A	1.056 down	interleukin 1, alpha
NM_000576	IL1B	1.168 up	interleukin 1, beta
NM_000577	IL1RN	1.020 up	interleukin 1 receptor antagonist
NM_000578	SLC11A1	1.058 down	solute carrier family 11 (proton-coupled divalent metal ion transporters), member 1
NM_000579	CCR5	1.006 down	chemokine (C-C motif) receptor 5
NM_000581	GPX1	1.041 down	glutathione peroxidase 1
NM_000582	SPP1	5.114 up	secreted phosphoprotein 1 (osteopontin, bone sialoprotein I, early T-lymphocyte activation 1)
NM_000583	GC	1.119 up	group-specific component (vitamin D binding protein)
NM_000584	IL8	1.107 down	interleukin 8
NM_000585	IL15	1.122 up	interleukin 15
NM_000586	IL2	1.149 down	interleukin 2
NM_000587	C7	1.029 down	complement component 7
NM_000588	IL3	1.059 up	interleukin 3 (colony-stimulating factor, multiple)
NM_000589	IL4	1.041 down	interleukin 4
NM_000590	IL9	1.041 down	interleukin 9
NM_000591	CD14	1.108 up	CD14 molecule
NM_000593	TAP1	1.078 up	transporter 1, ATP-binding cassette, sub-family B (MDR/TAP)
NM_000594	TNF	2.446 up	tumor necrosis factor (TNF superfamily, member 2)
NM_000595	LTA	1.159 up	lymphotoxin alpha (TNF superfamily, member 1)
NM_000596	IGFBP1	1.003 up	insulin-like growth factor binding protein 1
NM_000597	IGFBP2	1.263 up	insulin-like growth factor binding protein 2, 36kDa
NM_000598	IGFBP3	8.163 up	insulin-like growth factor binding protein 3
NM_000599	IGFBP5	10.650 up	insulin-like growth factor binding protein 5
NM_000600	IL6	2.609 up	interleukin 6 (interferon, beta 2)
NM_000601	HGF	1.068 down	hepatocyte growth factor (hepapoietin A; scatter factor)
NM_000602	SERPINE1	3.776 up	serpin peptidase inhibitor, clade E (nexin, plasminogen activator inhibitor type 1), member 1
NM_000603	NOS3	1.956 up	nitric oxide synthase 3 (endothelial cell)
NM_000604	FGFR1	2.784 down	fibroblast growth factor receptor 1 (fms-related tyrosine kinase 2, Pfeiffer syndrome)
NM_000605	IFNA2	1.076 down	interferon, alpha 2
NM_000606	C8G	1.175 up	complement component 8, gamma polypeptide
NM_000607	ORM1	1.161 down	orosomucoid 1
NM_000608	ORM2	1.146 down	alt 'AGP-B#AGP-B'#AGP2'; orosomucoid 2
NM_000609	CXCL12	1.748 down	chemokine (C-X-C motif) ligand 12 (stromal cell-derived factor 1)
NM_000610	CD44	5.989 up	CD44 molecule (Indian blood group)
NM_000611	CD59	1.423 up	CD59 molecule, complement regulatory protein
NM_000612	IGF2	12.329 up	insulin-like growth factor 2 (somatomedin A)
NM_000613	HPX	1.328 up	hemopexin
NM_000614	CNTF	1.135 down	ciliary neurotrophic factor
NM_000615	NCAM1	1.564 up	neural cell adhesion molecule 1
NM_000616	CD4	1.668 down	CD4 molecule
NM_000617	SLC11A2	1.110 down	solute carrier family 11 (proton-coupled divalent metal ion transporters), member 2
NM_000618	IGF1	1.015 up	insulin-like growth factor 1 (somatomedin C)
NM_000619	IFNG	1.007 up	interferon, gamma
NM_000620	NOS1	3.473 down	nitric oxide synthase 1 (neuronal)
NM_000621	HTR2A	1.004 down	5-hydroxytryptamine (serotonin) receptor 2A
NM_000623	BDKRB2	1.284 up	bradykinin receptor B2
NM_000624	SERPINA5	1.472 down	serpin peptidase inhibitor, clade A (alpha-1 antiproteinase, antitrypsin), member 5
NM_000625	NOS2A	1.119 down	nitric oxide synthase 2A (inducible, hepatocytes)
NM_000626	CD79B	1.150 down	CD79b molecule, immunoglobulin-associated beta
NM_000627	LTBP1	2.017 up	latent transforming growth factor beta binding protein 1
NM_000628	IL10RB	1.204 up	interleukin 10 receptor, beta
NM_000629	IFNAR1	1.409 up	interferon (alpha, beta and omega) receptor 1
NM_000631	NCF4	1.036 down	neutrophil cytosolic factor 4, 40kDa
NM_000632	ITGAM	1.010 up	integrin, alpha M (complement component 3 receptor 3 subunit)
NM_000633	BCL2	1.160 up	B-cell CLL/lymphoma 2
NM_000634	IL8RA	1.070 down	interleukin 8 receptor, alpha
NM_000635	RFX2	1.081 down	regulatory factor X, 2 (influences HLA class II expression)
NM_000636	SOD2	1.425 down	superoxide dismutase 2, mitochondrial
NM_000637	GSR	1.285 down	glutathione reductase
NM_000638	VTN	1.103 up	vitronectin
NM_000639	FASLG	1.105 up	Fas ligand (TNF superfamily, member 6)
NM_000640	IL13RA2	1.194 down	interleukin 13 receptor, alpha 2
NM_000641	IL11	2.652 up	interleukin 11
NM_000647	CCR2	1.025 down	chemokine (C-C motif) receptor 2
NM_000648	CCR2	1.046 down	chemokine (C-C motif) receptor 2
NM_000655	SELL	1.016 down	selectin L (lymphocyte adhesion molecule 1)
NM_000657	BCL2	1.076 down	B-cell CLL/lymphoma 2
NM_000658	AIRE	1.125 up	autoimmune regulator (autoimmune polyendocrinopathy candidiasis ectodermal dystrophy)
NM_000659	AIRE	1.065 up	autoimmune regulator (autoimmune polyendocrinopathy candidiasis ectodermal dystrophy)
NM_000660	TGFB1	3.052 up	transforming growth factor, beta 1 (Camurati-Engelmann disease)
NM_000661	RPL9	1.171 down	ribosomal protein L9
NM_000662	NAT1	1.073 up	N-acetyltransferase 1 (arylamine N-acetyltransferase)
NM_000663	ABAT	1.311 up	4-aminobutyrate aminotransferase
NM_000664	ACACA	1.087 down	acetyl-Coenzyme A carboxylase alpha
NM_000665	ACHE	2.801 up	acetylcholinesterase (Yt blood group)
NM_000666	ACY1	1.807 down	aminoacylase 1
NM_000667	ADH1A	1.232 up	alcohol dehydrogenase 1A (class I), alpha polypeptide
NM_000668	ADH1B	1.004 down	alcohol dehydrogenase IB (class I), beta polypeptide
NM_000669	ADH1C	1.007 up	alcohol dehydrogenase 1C (class I), gamma polypeptide
NM_000670	ADH4	1.042 up	alcohol dehydrogenase 4 (class II), pi polypeptide
NM_000671	ADH5	1.204 down	alcohol dehydrogenase 5 (class III), chi polypeptide
NM_000672	ADH6	1.117 up	alcohol dehydrogenase 6 (class V)
NM_000673	ADH7	1.020 up	alcohol dehydrogenase 7 (class IV), mu or sigma polypeptide
NM_000674	ADORA1	1.134 down	adenosine A1 receptor
NM_000675	ADORA2A	1.472 down	adenosine A2a receptor
NM_000676	ADORA2B	1.546 down	adenosine A2b receptor
NM_000677	ADORA3	1.048 down	adenosine A3 receptor
NM_000678	ADRA1D	1.047 up	adrenergic, alpha-1D-, receptor
NM_000679	ADRA1B	3.711 up	adrenergic, alpha-1B-, receptor
NM_000680	ADRA1A	1.221 down	adrenergic, alpha-1A-, receptor
NM_000681	ADRA2A	1.287 down	adrenergic, alpha-2A-, receptor
NM_000682	ADRA2B	2.751 down	adrenergic, alpha-2B-, receptor
NM_000683	ADRA2C	1.211 down	adrenergic, alpha-2C-, receptor
NM_000684	ADRB1	1.186 up	adrenergic, beta-1-, receptor
NM_000685	AGTR1	1.012 down	angiotensin II receptor, type 1
NM_000686	AGTR2	1.083 down	angiotensin II receptor, type 2
NM_000687	AHCY	1.421 down	S-adenosylhomocysteine hydrolase
NM_000688	ALAS1	1.072 down	aminolevulinate, delta-, synthase 1
NM_000689	ALDH1A1	1.341 down	aldehyde dehydrogenase 1 family, member A1
NM_000690	ALDH2	1.843 up	aldehyde dehydrogenase 2 family (mitochondrial)
NM_000691	ALDH3A1	1.094 down	aldehyde dehydrogenase 3 family, memberA1
NM_000692	ALDH1B1	1.494 down	aldehyde dehydrogenase 1 family, member B1
NM_000693	ALDH1A3	1.040 down	aldehyde dehydrogenase 1 family, member A3
NM_000694	ALDH3B1	1.610 down	aldehyde dehydrogenase 3 family, member B1
NM_000695	ALDH3B2	1.002 up	aldehyde dehydrogenase 3 family, member B2
NM_000696	ALDH9A1	1.056 down	aldehyde dehydrogenase 9 family, member A1
NM_000697	ALOX12	1.190 down	arachidonate 12-lipoxygenase
NM_000698	ALOX5	1.858 up	arachidonate 5-lipoxygenase
NM_000699	AMY2A	1.066 down	amylase, alpha 2A; pancreatic
NM_000700	ANXA1	6.188 up	annexin A1
NM_000701	ATP1A1	1.216 up	ATPase, Na+/K+ transporting, alpha 1 polypeptide
NM_000702	ATP1A2	2.718 down	ATPase, Na+/K+ transporting, alpha 2 (+) polypeptide
NM_000704	ATP4A	1.242 down	ATPase, H+/K+ exchanging, alpha polypeptide
NM_000705	ATP4B	1.162 down	ATPase, H+/K+ exchanging, beta polypeptide
NM_000706	AVPR1A	1.101 down	arginine vasopressin receptor 1A
NM_000707	AVPR1B	1.162 down	arginine vasopressin receptor 1B
NM_000709	BCKDHA	1.060 up	branched chain keto acid dehydrogenase E1, alpha polypeptide
NM_000710	BDKRB1	1.056 up	bradykinin receptor B1
NM_000712	BLVRA	1.495 down	biliverdin reductase A
NM_000713	BLVRB	1.261 down	biliverdin reductase B (flavin reductase (NADPH))
NM_000714	BZRP	1.365 up	benzodiazapine receptor (peripheral)
NM_000715	C4BPA	1.012 up	complement component 4 binding protein, alpha
NM_000716	C4BPB	1.392 up	complement component 4 binding protein, beta
NM_000717	CA4	1.272 down	carbonic anhydrase IV
NM_000718	CACNA1B	1.535 down	calcium channel, voltage-dependent, L type, alpha 1B subunit
NM_000719	CACNA1C	1.146 up	calcium channel, voltage-dependent, L type, alpha 1C subunit
NM_000720	CACNA1D	1.256 down	calcium channel, voltage-dependent, L type, alpha 1D subunit
NM_000721	CACNA1E	1.069 down	calcium channel, voltage-dependent, alpha 1E subunit
NM_000722	CACNA2D1	2.534 down	calcium channel, voltage-dependent, alpha 2/delta subunit 1
NM_000723	CACNB1	1.050 up	calcium channel, voltage-dependent, beta 1 subunit
NM_000724	CACNB2	1.229 down	calcium channel, voltage-dependent, beta 2 subunit
NM_000725	CACNB3	1.568 up	calcium channel, voltage-dependent, beta 3 subunit
NM_000726	CACNB4	1.290 down	calcium channel, voltage-dependent, beta 4 subunit
NM_000727	CACNG1	1.131 up	calcium channel, voltage-dependent, gamma subunit 1
NM_000728	CALCB	1.841 down	calcitonin-related polypeptide, beta
NM_000729	CCK	1.150 down	cholecystokinin
NM_000730	CCKAR	1.052 down	cholecystokinin A receptor
NM_000732	CD3D	1.010 down	CD3d molecule, delta (CD3-TCR complex)
NM_000733	CD3E	1.043 down	CD3e molecule, epsilon (CD3-TCR complex)
NM_000734	CD247	1.232 down	CD247 molecule
NM_000735	CGA	1.111 down	glycoprotein hormones, alpha polypeptide
NM_000737	CGB	1.103 up	chorionic gonadotropin, beta polypeptide
NM_000738	CHRM1	1.059 down	cholinergic receptor, muscarinic 1
NM_000739	CHRM2	1.016 up	cholinergic receptor, muscarinic 2
NM_000740	CHRM3	1.248 down	cholinergic receptor, muscarinic 3
NM_000741	CHRM4	1.028 up	cholinergic receptor, muscarinic 4
NM_000742	CHRNA2	1.063 up	cholinergic receptor, nicotinic, alpha 2 (neuronal)
NM_000743	CHRNA3	2.233 down	cholinergic receptor, nicotinic, alpha 3
NM_000744	CHRNA4	1.237 down	cholinergic receptor, nicotinic, alpha 4
NM_000745	CHRNA5	4.065 down	cholinergic receptor, nicotinic, alpha 5
NM_000746	CHRNA7	2.085 down	cholinergic receptor, nicotinic, alpha 7
NM_000747	CHRNB1	1.589 up	cholinergic receptor, nicotinic, beta 1 (muscle)
NM_000748	CHRNB2	1.248 down	cholinergic receptor, nicotinic, beta 2 (neuronal)
NM_000749	CHRNB3	1.006 down	cholinergic receptor, nicotinic, beta 3
NM_000750	CHRNB4	1.666 down	cholinergic receptor, nicotinic, beta 4
NM_000751	CHRND	1.102 down	cholinergic receptor, nicotinic, delta
NM_000754	COMT	1.775 down	catechol-O-methyltransferase
NM_000755	CRAT	1.120 up	carnitine acetyltransferase
NM_000756	CRH	1.153 up	corticotropin releasing hormone
NM_000757	CSF1	2.167 up	colony stimulating factor 1 (macrophage)
NM_000758	CSF2	1.038 down	colony stimulating factor 2 (granulocyte-macrophage)
NM_000759	CSF3	1.018 down	colony stimulating factor 3 (granulocyte)
NM_000760	CSF3R	1.164 up	colony stimulating factor 3 receptor (granulocyte)
NM_000761	CYP1A2	1.007 down	cytochrome P450, family 1, subfamily A, polypeptide 2
NM_000762	CYP2A6	1.022 down	cytochrome P450, family 2, subfamily A, polypeptide 6
NM_000764	CYP2A7	1.023 up	cytochrome P450, family 2, subfamily A, polypeptide 7
NM_000765	CYP3A7	1.010 up	cytochrome P450, family 3, subfamily A, polypeptide 7
NM_000766	CYP2A13	1.281 down	cytochrome P450, family 2, subfamily A, polypeptide 13
NM_000767	CYP2B6	1.026 down	cytochrome P450, family 2, subfamily B, polypeptide 6
NM_000769	CYP2C19	1.220 up	cytochrome P450, family 2, subfamily C, polypeptide 19
NM_000770	CYP2C8	1.632 up	cytochrome P450, family 2, subfamily C, polypeptide 8
NM_000771	CYP2C9	1.345 up	cytochrome P450, family 2, subfamily C, polypeptide 9
NM_000772	CYP2C18	1.098 up	cytochrome P450, family 2, subfamily C, polypeptide 18
NM_000773	CYP2E1	1.091 down	cytochrome P450, family 2, subfamily E, polypeptide 1
NM_000774	CYP2F1	1.106 down	cytochrome P450, family 2, subfamily F, polypeptide 1
NM_000775	CYP2J2	1.123 down	cytochrome P450, family 2, subfamily J, polypeptide 2
NM_000777	CYP3A5	1.098 up	cytochrome P450, family 3, subfamily A, polypeptide 5
NM_000778	CYP4A11	1.007 up	cytochrome P450, family 4, subfamily A, polypeptide 11
NM_000779	CYP4B1	1.086 up	cytochrome P450, family 4, subfamily B, polypeptide 1
NM_000780	CYP7A1	1.036 down	cytochrome P450, family 7, subfamily A, polypeptide 1
NM_000781	CYP11A1	1.261 up	cytochrome P450, family 11, subfamily A, polypeptide 1
NM_000782	CYP24A1	1.044 up	cytochrome P450, family 24, subfamily A, polypeptide 1
NM_000783	CYP26A1	13.013 down	cytochrome P450, family 26, subfamily A, polypeptide 1
NM_000784	CYP27A1	1.241 up	cytochrome P450, family 27, subfamily A, polypeptide 1
NM_000785	CYP27B1	1.007 down	cytochrome P450, family 27, subfamily B, polypeptide 1
NM_000786	CYP51A1	1.132 up	cytochrome P450, family 51, subfamily A, polypeptide 1
NM_000787	DBH	1.051 down	dopamine beta-hydroxylase (dopamine beta-monooxygenase)
NM_000788	DCK	1.434 down	deoxycytidine kinase
NM_000789	ACE	1.295 down	angiotensin I converting enzyme (peptidyl-dipeptidase A) 1
NM_000790	DDC	1.084 up	dopa decarboxylase (aromatic L-amino acid decarboxylase)
NM_000791	DHFR	1.863 down	dihydrofolate reductase
NM_000792	DIO1	1.185 up	deiodinase, iodothyronine, type I
NM_000793	DIO2	1.882 up	deiodinase, iodothyronine, type II
NM_000794	DRD1	1.025 up	dopamine receptor D1
NM_000795	DRD2	1.021 up	dopamine receptor D2
NM_000796	DRD3	none	dopamine receptor D3
NM_000797	DRD4	1.416 down	dopamine receptor D4
NM_000798	DRD5	1.022 up	dopamine receptor D5
NM_000799	EPO	1.146 down	erythropoietin
NM_000800	FGF1	2.219 up	fibroblast growth factor 1 (acidic)
NM_000801	FKBP1A	1.608 up	FK506 binding protein 1A, 12kDa
NM_000802	FOLR1	1.137 up	folate receptor 1 (adult)
NM_000803	FOLR2	1.059 down	folate receptor 2 (fetal)
NM_000804	FOLR3	1.031 down	folate receptor 3 (gamma)
NM_000805	GAST	1.000 down	gastrin
NM_000806	GABRA1	1.057 down	gamma-aminobutyric acid (GABA) A receptor, alpha 1
NM_000807	GABRA2	1.134 down	gamma-aminobutyric acid (GABA) A receptor, alpha 2
NM_000808	GABRA3	2.405 down	gamma-aminobutyric acid (GABA) A receptor, alpha 3
NM_000809	GABRA4	1.052 down	gamma-aminobutyric acid (GABA) A receptor, alpha 4
NM_000810	GABRA5	2.226 down	gamma-aminobutyric acid (GABA) A receptor, alpha 5
NM_000811	GABRA6	1.094 down	gamma-aminobutyric acid (GABA) A receptor, alpha 6
NM_000812	GABRB1	1.002 up	gamma-aminobutyric acid (GABA) A receptor, beta 1
NM_000813	GABRB2	1.135 down	gamma-aminobutyric acid (GABA) A receptor, beta 2
NM_000814	GABRB3	3.172 down	gamma-aminobutyric acid (GABA) A receptor, beta 3
NM_000815	GABRD	1.317 down	gamma-aminobutyric acid (GABA) A receptor, delta
NM_000816	GABRG2	1.292 down	gamma-aminobutyric acid (GABA) A receptor, gamma 2
NM_000817	GAD1	1.052 up	glutamate decarboxylase 1 (brain, 67kDa)
NM_000818	GAD2	1.113 up	glutamate decarboxylase 2 (pancreatic islets and brain, 65kDa)
NM_000819	GART	1.664 down	phosphoribosylglycinamide formyltransferase, phosphoribosylglycinamide synthetase, phosphoribosylaminoimidazole synthetase
NM_000820	GAS6	3.357 up	growth arrest-specific 6
NM_000821	GGCX	1.241 up	gamma-glutamyl carboxylase
NM_000823	GHRHR	1.007 down	growth hormone releasing hormone receptor
NM_000824	GLRB	1.105 up	glycine receptor, beta
NM_000825	GNRH1	1.647 up	gonadotropin-releasing hormone 1 (luteinizing-releasing hormone)
NM_000826	GRIA2	1.031 down	glutamate receptor, ionotropic, AMPA 2
NM_000827	GRIA1	1.711 down	glutamate receptor, ionotropic, AMPA 1
NM_000828	GRIA3	1.039 up	glutamate receptor, ionotrophic, AMPA 3
NM_000829	GRIA4	1.075 down	glutamate receptor, ionotrophic, AMPA 4
NM_000830	GRIK1	1.244 up	glutamate receptor, ionotropic, kainate 1
NM_000831	GRIK3	1.369 down	glutamate receptor, ionotropic, kainate 3
NM_000832	GRIN1	1.680 down	glutamate receptor, ionotropic, N-methyl D-aspartate 1
NM_000833	GRIN2A	1.543 down	glutamate receptor, ionotropic, N-methyl D-aspartate 2A
NM_000834	GRIN2B	1.364 down	glutamate receptor, ionotropic, N-methyl D-aspartate 2B
NM_000835	GRIN2C	1.009 up	glutamate receptor, ionotropic, N-methyl D-aspartate 2C
NM_000836	GRIN2D	1.024 down	glutamate receptor, ionotropic, N-methyl D-aspartate 2D
NM_000837	GRINA	1.308 up	glutamate receptor, ionotropic, N-methyl D-asparate-associated protein 1 (glutamate binding)
NM_000838	GRM1	1.037 down	glutamate receptor, metabotropic 1
NM_000839	GRM2	1.406 down	glutamate receptor, metabotropic 2
NM_000840	GRM3	1.197 down	glutamate receptor, metabotropic 3
NM_000841	GRM4	2.510 down	glutamate receptor, metabotropic 4
NM_000842	GRM5	1.102 down	glutamate receptor, metabotropic 5
NM_000843	GRM6	1.004 down	glutamate receptor, metabotropic 6
NM_000844	GRM7	1.010 up	glutamate receptor, metabotropic 7
NM_000845	GRM8	1.144 down	glutamate receptor, metabotropic 8
NM_000846	GSTA2	1.149 down	glutathione S-transferase A2
NM_000847	GSTA3	1.131 down	glutathione S-transferase A3
NM_000848	GSTM2	1.532 down	glutathione S-transferase M2 (muscle)
NM_000849	GSTM3	1.023 up	glutathione S-transferase M3 (brain)
NM_000850	GSTM4	1.313 down	glutathione S-transferase M4
NM_000851	GSTM5	1.059 down	glutathione S-transferase M5
NM_000852	GSTP1	1.104 down	glutathione S-transferase pi
NM_000853	GSTT1	1.174 down	glutathione S-transferase theta 1
NM_000854	GSTT2	1.179 up	glutathione S-transferase theta 2
NM_000855	GUCY1A2	1.246 down	guanylate cyclase 1, soluble, alpha 2
NM_000856	GUCY1A3	3.334 up	guanylate cyclase 1, soluble, alpha 3
NM_000857	GUCY1B3	2.552 up	guanylate cyclase 1, soluble, beta 3
NM_000858	GUK1	1.683 up	guanylate kinase 1
NM_000859	HMGCR	1.155 down	3-hydroxy-3-methylglutaryl-Coenzyme A reductase
NM_000860	HPGD	1.419 up	hydroxyprostaglandin dehydrogenase 15-(NAD)
NM_000861	HRH1	1.207 up	histamine receptor H1
NM_000862	HSD3B1	1.330 up	hydroxy-delta-5-steroid dehydrogenase, 3 beta- and steroid delta-isomerase 1
NM_000863	HTR1B	1.220 down	5-hydroxytryptamine (serotonin) receptor 1B
NM_000864	HTR1D	2.179 up	5-hydroxytryptamine (serotonin) receptor 1D
NM_000865	HTR1E	1.379 up	5-hydroxytryptamine (serotonin) receptor 1E
NM_000866	HTR1F	1.162 down	5-hydroxytryptamine (serotonin) receptor 1F
NM_000867	HTR2B	1.005 up	5-hydroxytryptamine (serotonin) receptor 2B
NM_000868	HTR2C	1.257 down	5-hydroxytryptamine (serotonin) receptor 2C
NM_000869	HTR3A	3.044 down	5-hydroxytryptamine (serotonin) receptor 3A
NM_000870	HTR4	1.172 up	5-hydroxytryptamine (serotonin) receptor 4
NM_000871	HTR6	1.009 down	5-hydroxytryptamine (serotonin) receptor 6
NM_000872	HTR7	1.132 down	5-hydroxytryptamine (serotonin) receptor 7 (adenylate cyclase-coupled)
NM_000873	ICAM2	1.126 down	intercellular adhesion molecule 2
NM_000874	IFNAR2	1.430 up	interferon (alpha, beta and omega) receptor 2
NM_000875	IGF1R	1.499 up	insulin-like growth factor 1 receptor
NM_000876	IGF2R	1.291 up	insulin-like growth factor 2 receptor
NM_000877	IL1R1	1.452 up	interleukin 1 receptor, type I
NM_000878	IL2RB	2.117 up	interleukin 2 receptor, beta
NM_000879	IL5	1.010 down	interleukin 5 (colony-stimulating factor, eosinophil)
NM_000880	IL7	1.436 up	interleukin 7
NM_000882	IL12A	1.222 down	interleukin 12A (natural killer cell stimulatory factor 1, cytotoxic lymphocyte maturation factor 1, p35)
NM_000883	IMPDH1	1.366 down	IMP (inosine monophosphate) dehydrogenase 1
NM_000884	IMPDH2	1.394 down	IMP (inosine monophosphate) dehydrogenase 2
NM_000885	ITGA4	1.154 down	integrin, alpha 4 (antigen CD49D, alpha 4 subunit of VLA-4 receptor)
NM_000887	ITGAX	1.122 down	integrin, alpha X (complement component 3 receptor 4 subunit)
NM_000888	ITGB6	4.171 up	integrin, beta 6
NM_000889	ITGB7	1.031 down	integrin, beta 7
NM_000890	KCNJ5	1.665 up	potassium inwardly-rectifying channel, subfamily J, member 5
NM_000891	KCNJ2	2.212 up	potassium inwardly-rectifying channel, subfamily J, member 2
NM_000892	KLKB1	6.897 down	kallikrein B, plasma (Fletcher factor) 1
NM_000893	KNG1	1.044 down	kininogen 1
NM_000894	LHB	1.328 down	luteinizing hormone beta polypeptide
NM_000895	LTA4H	1.683 down	leukotriene A4 hydrolase
NM_000896	CYP4F3	1.007 down	cytochrome P450, family 4, subfamily F, polypeptide 3
NM_000897	LTC4S	1.182 down	leukotriene C4 synthase
NM_000898	MAOB	1.157 down	monoamine oxidase B
NM_000899	KITLG	1.352 down	KIT ligand
NM_000900	MGP	1.009 up	matrix Gla protein
NM_000901	NR3C2	1.740 up	nuclear receptor subfamily 3, group C, member 2
NM_000902	MME	2.641 up	membrane metallo-endopeptidase (neutral endopeptidase, enkephalinase, CALLA, CD10)
NM_000903	NQO1	2.759 up	NAD(P)H dehydrogenase, quinone 1
NM_000904	NQO2	3.099 down	NAD(P)H dehydrogenase, quinone 2
NM_000905	NPY	2.351 down	neuropeptide Y
NM_000906	NPR1	1.852 down	natriuretic peptide receptor A/guanylate cyclase A (atrionatriuretic peptide receptor A)
NM_000907	NPR2	1.081 up	natriuretic peptide receptor B/guanylate cyclase B (atrionatriuretic peptide receptor B)
NM_000908	NPR3	1.038 up	natriuretic peptide receptor C/guanylate cyclase C (atrionatriuretic peptide receptor C)
NM_000909	NPY1R	3.112 down	neuropeptide Y receptor Y1
NM_000910	NPY2R	1.035 down	neuropeptide Y receptor Y2
NM_000911	OPRD1	1.078 down	opioid receptor, delta 1
NM_000912	OPRK1	1.048 down	opioid receptor, kappa 1
NM_000913	OPRL1	1.154 up	opiate receptor-like 1
NM_000914	OPRM1	1.054 up	opioid receptor, mu 1
NM_000915	OXT	1.110 down	oxytocin, prepro- (neurophysin I)
NM_000916	OXTR	1.238 up	oxytocin receptor
NM_000917	P4HA1	1.360 up	procollagen-proline, 2-oxoglutarate 4-dioxygenase (proline 4-hydroxylase), alpha polypeptide I
NM_000918	P4HB	1.163 up	procollagen-proline, 2-oxoglutarate 4-dioxygenase (proline 4-hydroxylase), beta polypeptide
NM_000919	PAM	1.494 up	peptidylglycine alpha-amidating monooxygenase
NM_000920	PC	1.552 down	pyruvate carboxylase
NM_000921	PDE3A	3.538 up	phosphodiesterase 3A, cGMP-inhibited
NM_000922	PDE3B	1.526 down	phosphodiesterase 3B, cGMP-inhibited
NM_000923	PDE4C	1.171 down	phosphodiesterase 4C, cAMP-specific (phosphodiesterase E1 dunce homolog, Drosophila)
NM_000924	PDE1B	1.678 down	phosphodiesterase 1B, calmodulin-dependent
NM_000925	PDHB	1.129 down	pyruvate dehydrogenase (lipoamide) beta
NM_000926	PGR	1.083 down	progesterone receptor
NM_000927	ABCB1	1.005 down	ATP-binding cassette, sub-family B (MDR/TAP), member 1
NM_000928	PLA2G1B	1.004 down	phospholipase A2, group IB (pancreas)
NM_000929	PLA2G5	1.039 up	phospholipase A2, group V
NM_000930	PLAT	5.063 up	plasminogen activator, tissue
NM_000931	PLAT	4.992 up	plasminogen activator, tissue
NM_000932	PLCB3	1.605 down	phospholipase C, beta 3 (phosphatidylinositol-specific)
NM_000933	PLCB4	1.112 up	phospholipase C, beta 4
NM_000934	SERPINF2	1.011 down	serpin peptidase inhibitor, clade F (alpha-2 antiplasmin, pigment epithelium derived factor), member 2
NM_000935	PLOD2	3.758 up	procollagen-lysine, 2-oxoglutarate 5-dioxygenase 2
NM_000936	PNLIP	1.121 down	pancreatic lipase
NM_000937	POLR2A	1.390 down	polymerase (RNA) II (DNA directed) polypeptide A, 220kDa
NM_000938	POLR2B	1.077 down	polymerase (RNA) II (DNA directed) polypeptide B, 140kDa
NM_000939	POMC	1.212 down	proopiomelanocortin (adrenocorticotropin/ beta-lipotropin/ alpha-melanocyte stimulating hormone/ beta-melanocyte stimulating hormone/ beta-endorphin)
NM_000940	PON3	1.019 up	paraoxonase 3
NM_000941	POR	1.184 down	P450 (cytochrome) oxidoreductase
NM_000942	PPIB	1.077 up	peptidylprolyl isomerase B (cyclophilin B)
NM_000943	PPIC	1.241 up	peptidylprolyl isomerase C (cyclophilin C)
NM_000944	PPP3CA	2.050 up	protein phosphatase 3 (formerly 2B), catalytic subunit, alpha isoform (calcineurin A alpha)
NM_000945	PPP3R1	1.118 down	protein phosphatase 3 (formerly 2B), regulatory subunit B, 19kDa, alpha isoform (calcineurin B, type I)
NM_000946	PRIM1	2.780 down	primase, polypeptide 1, 49kDa
NM_000947	PRIM2A	1.533 down	primase, polypeptide 2A, 58kDa
NM_000948	PRL	1.029 down	prolactin
NM_000949	PRLR	1.400 up	prolactin receptor
NM_000950	PRRG1	1.906 up	proline rich Gla (G-carboxyglutamic acid) 1
NM_000951	PRRG2	1.054 down	proline rich Gla (G-carboxyglutamic acid) 2
NM_000952	PTAFR	1.520 down	platelet-activating factor receptor
NM_000953	PTGDR	1.115 down	prostaglandin D2 receptor (DP)
NM_000954	PTGDS	1.139 down	prostaglandin D2 synthase 21kDa (brain)
NM_000955	PTGER1	1.116 down	prostaglandin E receptor 1 (subtype EP1), 42kDa
NM_000956	PTGER2	1.331 down	prostaglandin E receptor 2 (subtype EP2), 53kDa
NM_000957	PTGER3	1.135 down	prostaglandin E receptor 3 (subtype EP3)
NM_000958	PTGER4	3.768 up	prostaglandin E receptor 4 (subtype EP4)
NM_000959	PTGFR	1.010 down	prostaglandin F receptor (FP)
NM_000960	PTGIR	1.078 down	prostaglandin I2 (prostacyclin) receptor (IP)
NM_000961	PTGIS	1.036 up	prostaglandin I2 (prostacyclin) synthase
NM_000962	PTGS1	1.680 down	prostaglandin-endoperoxide synthase 1 (prostaglandin G/H synthase and cyclooxygenase)
NM_000963	PTGS2	1.506 up	prostaglandin-endoperoxide synthase 2 (prostaglandin G/H synthase and cyclooxygenase)
NM_000964	RARA	1.050 up	retinoic acid receptor, alpha
NM_000965	RARB	2.927 up	retinoic acid receptor, beta
NM_000966	RARG	2.729 down	retinoic acid receptor, gamma
NM_000967	RPL3	1.097 down	ribosomal protein L3
NM_000968	RPL4	1.055 down	ribosomal protein L4
NM_000969	RPL5	1.012 down	ribosomal protein L5
NM_000970	RPL6	1.265 down	ribosomal protein L6
NM_000971	RPL7	1.108 down	ribosomal protein L7
NM_000972	RPL7A	1.159 down	ribosomal protein L7a
NM_000973	RPL8	1.098 down	ribosomal protein L8
NM_000975	RPL11	1.136 down	ribosomal protein L11
NM_000976	RPL12	1.121 down	ribosomal protein L12
NM_000977	RPL13	1.141 down	ribosomal protein L13
NM_000978	RPL23	1.115 down	ribosomal protein L23
NM_000979	RPL18	1.057 down	ribosomal protein L18
NM_000980	RPL18A	1.148 down	ribosomal protein L18a
NM_000981	RPL19	1.307 down	ribosomal protein L19
NM_000982	RPL21	1.178 down	ribosomal protein L21
NM_000983	RPL22	1.115 down	ribosomal protein L22
NM_000984	RPL23A	1.210 down	ribosomal protein L23a
NM_000985	RPL17	1.175 down	ribosomal protein L17
NM_000986	RPL24	1.191 down	ribosomal protein L24
NM_000987	RPL26	1.160 down	ribosomal protein L26
NM_000988	RPL27	1.619 down	ribosomal protein L27
NM_000989	RPL30	1.095 down	ribosomal protein L30
NM_000990	RPL27A	1.299 down	ribosomal protein L27a
NM_000991	RPL28	1.019 up	ribosomal protein L28
NM_000992	RPL29	1.299 down	ribosomal protein L29
NM_000993	RPL31	1.169 down	ribosomal protein L31
NM_000994	RPL32	1.482 down	ribosomal protein L32
NM_000995	RPL34	1.542 down	ribosomal protein L34
NM_000996	RPL35A	1.261 down	ribosomal protein L35a
NM_000997	RPL37	1.246 down	ribosomal protein L37
NM_000998	RPL37A	1.361 down	ribosomal protein L37a
NM_000999	RPL38	1.206 down	ribosomal protein L38
NM_001000	RPL39	1.164 down	ribosomal protein L39
NM_001001	RPL36AL	1.175 up	ribosomal protein L36a-like
NM_001001132	ITSN1	1.423 down	intersectin 1 (SH3 domain protein)
NM_001001188	TRPM2	1.102 down	transient receptor potential cation channel, subfamily M, member 2
NM_001001290	SLC2A9	1.146 up	solute carrier family 2 (facilitated glucose transporter), member 9
NM_001001317	TRY1	1.186 down	trypsin X3
NM_001001323	ATP2B1	2.731 up	ATPase, Ca++ transporting, plasma membrane 1
NM_001001325	SPINK5L2	1.043 down	Kazal type serine protease inhibitor 5-like 2
NM_001001329	PRKCSH	1.011 up	protein kinase C substrate 80K-H
NM_001001330	REEP3	2.510 up	receptor accessory protein 3
NM_001001331	ATP2B2	1.070 down	ATPase, Ca++ transporting, plasma membrane 2
NM_001001336	CYB5R2	1.514 up	cytochrome b5 reductase 2
NM_001001342	BLOC1S2	1.139 up	biogenesis of lysosome-related organelles complex-1, subunit 2
NM_001001343	MGC27121	1.067 down	MGC27121 gene
NM_001001344	ATP2B3	1.090 up	ATPase, Ca++ transporting, plasma membrane 3
NM_001001346	CLDN20	1.141 down	claudin 20
NM_001001349	NKIRAS2	1.157 up	NFKB inhibitor interacting Ras-like 2
NM_001001394	HCG3	1.001 up	HCG3 gene
NM_001001395	LMO3	1.116 down	LIM domain only 3 (rhombotin-like 2)
NM_001001396	ATP2B4	3.229 up	ATPase, Ca++ transporting, plasma membrane 4
NM_001001410	MGC24381	1.352 up	hypothetical protein MGC24381
NM_001001411	ZNF676	1.148 down	zinc finger protein 676
NM_001001412	FAM26C	1.210 down	family with sequence similarity 26, member C
NM_001001414	LOC342897	1.438 down	similar to F-box only protein 2
NM_001001415	ZNF429	1.045 down	zinc finger protein 429
NM_001001417	TBC1D3B	1.779 up	TBC1 domain family, member 3B
NM_001001418	TBC1D3C	1.921 up	TBC1 domain family, member 3C
NM_001001419	SMAD5	1.101 up	SMAD, mothers against DPP homolog 5 (Drosophila)
NM_001001433	STX16	1.223 up	syntaxin 16
NM_001001435	CCL4L1	1.174 up	chemokine (C-C motif) ligand 4-like 1
NM_001001436	LOC388272	1.027 up	similar to RIKEN cDNA 4921524J17
NM_001001437	CCL3L3	1.126 up	chemokine (C-C motif) ligand 3-like 3
NM_001001438	LSS	1.444 up	lanosterol synthase (2,3-oxidosqualene-lanosterol cyclase)
NM_001001479	SLC35E4	1.298 down	solute carrier family 35, member E4
NM_001001481	UBE2W	1.042 up	ubiquitin-conjugating enzyme E2W (putative)
NM_001001483	ZDHHC13	1.124 down	zinc finger, DHHC-type containing 13
NM_001001484	PTER	1.283 down	phosphotriesterase related
NM_001001485	ATP2C1	1.218 up	ATPase, Ca++ transporting, type 2C, member 1
NM_001001486	ATP2C1	1.217 up	ATPase, Ca++ transporting, type 2C, member 1
NM_001001502	SNCB	3.098 down	synuclein, beta
NM_001001503	NDUFV3	1.062 up	NADH dehydrogenase (ubiquinone) flavoprotein 3, 10kDa
NM_001001520	HDGF2	1.055 down	hepatoma-derived growth factor-related protein 2
NM_001001521	UGP2	1.650 down	UDP-glucose pyrophosphorylase 2
NM_001001522	TAGLN	1.699 up	transgelin
NM_001001523	RORC	1.036 up	RAR-related orphan receptor C
NM_001001524	TM6SF2	1.148 down	transmembrane 6 superfamily member 2
NM_001001548	CD36	1.443 down	CD36 molecule (thrombospondin receptor)
NM_001001549	GRB10	1.492 down	growth factor receptor-bound protein 10
NM_001001551	C9orf103	1.168 up	chromosome 9 open reading frame 103
NM_001001552	LEMD1	1.170 up	LEM domain containing 1
NM_001001556	GALK2	1.242 up	galactokinase 2
NM_001001557	GDF6	7.245 up	growth differentiation factor 6
NM_001001560	GGA1	1.147 up	golgi associated, gamma adaptin ear containing, ARF binding protein 1
NM_001001561	GGA1	1.224 up	golgi associated, gamma adaptin ear containing, ARF binding protein 1
NM_001001563	TIMM50	1.436 down	translocase of inner mitochondrial membrane 50 homolog (S. cerevisiae)
NM_001001567	PDE9A	2.740 down	phosphodiesterase 9A
NM_001001576	PDE9A	2.760 down	phosphodiesterase 9A
NM_001001586	ATP1A1	1.121 up	ATPase, Na+/K+ transporting, alpha 1 polypeptide
NM_001001651	MED8	1.515 up	mediator of RNA polymerase II transcription, subunit 8 homolog (S. cerevisiae)
NM_001001653	MED8	1.517 up	mediator of RNA polymerase II transcription, subunit 8 homolog (S. cerevisiae)
NM_001001654	MED8	1.567 up	mediator of RNA polymerase II transcription, subunit 8 homolog (S. cerevisiae)
NM_001001655	ALKBH2	1.298 down	alkB, alkylation repair homolog 2 (E. coli)
NM_001001656	OR9A4	1.434 up	olfactory receptor, family 9, subfamily A, member 4
NM_001001657	OR2Y1	1.025 down	olfactory receptor, family 2, subfamily Y, member 1
NM_001001658	OR9A2	1.116 up	olfactory receptor, family 9, subfamily A, member 2
NM_001001659	OR2A14	1.096 up	olfactory receptor, family 2, subfamily A, member 14
NM_001001660	LOC144363	1.209 down	hypothetical protein LOC144363
NM_001001661	ZNF425	1.063 up	zinc finger protein 425
NM_001001662	FLJ16636	1.084 down	FLJ16636 protein
NM_001001663	bA9F11.1	1.035 down	hypothetical LOC255349
NM_001001664	LOC339745	1.866 up	hypothetical protein LOC339745
NM_001001665	FLJ16008	1.855 up	FLJ16008 protein
NM_001001666	TMEM16G	1.121 down	transmembrane protein 16G
NM_001001667	OR6V1	1.078 up	olfactory receptor, family 6, subfamily V, member 1
NM_001001668	FLJ26175	1.698 down	FLJ26175 protein
NM_001001669	FLJ41603	1.607 up	FLJ41603 protein
NM_001001670	FLJ46321	1.057 up	FLJ46321 protein
NM_001001671	MAP3K15	1.065 up	mitogen-activated protein kinase kinase kinase 15
NM_001001673	RNASE9	1.080 up	ribonuclease, RNase A family, 9 (non-active)
NM_001001674	OR4F15	1.061 down	olfactory receptor, family 4, subfamily F, member 15
NM_001001675	FLJ46385	1.438 up	FLJ46385 protein
NM_001001676	LCN9	5.464 up	lipocalin 9
NM_001001677	FLJ46300	1.191 down	FLJ46300 protein
NM_001001678	FLJ44653	1.229 up	FLJ44653 protein
NM_001001679	FLJ41423	1.063 up	FLJ41423 protein
NM_001001680	FLJ42102	1.029 up	FLJ42102 protein
NM_001001681	FLJ45300	1.125 down	FLJ45300 protein
NM_001001682	FLJ45530	1.301 down	FLJ45530 protein
NM_001001683	MED11	1.438 down	mediator of RNA polymerase II transcription, subunit 11 homolog (S. cerevisiae)
NM_001001684	FLJ45831	1.002 up	FLJ45831 protein
NM_001001685	FLJ45079	1.113 down	FLJ45079 protein
NM_001001686	FLJ43870	1.042 down	FLJ43870 protein
NM_001001687	FLJ26850	1.023 up	FLJ26850 protein
NM_001001688	FLJ35409	2.131 up	FLJ35409 protein
NM_001001689	FLJ44005	1.021 down	FLJ44005 protein
NM_001001690	FLJ42133	1.036 down	hypothetical FLJ42133
NM_001001691	FLJ44790	1.074 down	FLJ44790 protein
NM_001001692	FLJ45139	1.023 down	FLJ45139 protein
NM_001001693	RP11-191L9.1	1.006 up	FLJ46257 protein
NM_001001694	FLJ41993	1.052 up	FLJ41993 protein
NM_001001695	FLJ42418	1.038 down	FLJ42418 protein
NM_001001696	FLJ44006	1.172 up	FLJ44006 protein
NM_001001697	FLJ41821	1.162 down	FLJ41821 protein
NM_001001698	FLJ43879	1.067 up	FLJ43879 protein
NM_001001699	FLJ25996	1.072 down	FLJ25996 protein
NM_001001700	FLJ45966	1.024 down	FLJ45966 protein
NM_001001701	LOC401152	1.530 up	HCV F-transactivated protein 1
NM_001001702	FLJ33360	1.014 up	FLJ33360 protein
NM_001001703	FLJ46010	1.035 down	FLJ46010 protein
NM_001001704	FLJ44796	1.601 up	FLJ44796 protein
NM_001001705	FLJ41649	1.136 down	FLJ41649 protein
NM_001001706	FLJ42177	1.041 up	FLJ42177 protein
NM_001001707	FLJ45974	1.112 down	FLJ45974 protein
NM_001001709	FLJ45537	1.041 up	FLJ45537 protein
NM_001001710	LOC401565	1.110 down	similar to 4931415M17 protein
NM_001001711	DDI1	1.030 up	DDI1, DNA-damage inducible 1, homolog 1 (S. cerevisiae)
NM_001001712	LCN10	1.286 down	lipocalin 10
NM_001001713	SH3BGR	1.107 down	SH3 domain binding glutamic acid-rich protein
NM_001001715	FARP1	1.005 down	FERM, RhoGEF (ARHGEF) and pleckstrin domain protein 1 (chondrocyte-derived)
NM_001001716	NFKBIB	1.443 down	nuclear factor of kappa light polypeptide gene enhancer in B-cells inhibitor, beta
NM_001001722	CDY2B	1.079 up	chromodomain protein, Y-linked, 2B
NM_001001723	TMEM1	1.183 up	transmembrane protein 1
NM_001001731	HHCM	1.053 up	Mahlavu hepatocellular carcinoma
NM_001001732	C10orf130	1.044 up	chromosome 10 open reading frame 130
NM_001001734	ATP1A4	1.079 down	ATPase, Na+/K+ transporting, alpha 4 polypeptide
NM_001001740	RFWD2	1.088 up	ring finger and WD repeat domain 2
NM_001001786	BRCC2	1.042 up	BRCC2
NM_001001787	ATP1B1	1.472 up	ATPase, Na+/K+ transporting, beta 1 polypeptide
NM_001001788	RAET1G	1.157 down	retinoic acid early transcript 1G
NM_001001789	C21orf24	1.118 down	chromosome 21 open reading frame 24
NM_001001791	C10orf55	1.009 up	chromosome 10 open reading frame 55
NM_001001794	FAM116B	1.161 up	family with sequence similarity 116, member B
NM_001001795	MGC70857	1.052 down	similar to RIKEN cDNA C030006K11 gene
NM_001001802	OR2A42	1.020 up	olfactory receptor, family 2, subfamily A, member 42
NM_001001821	OR2T34	1.069 down	olfactory receptor, family 2, subfamily T, member 34
NM_001001824	OR2T27	1.028 down	olfactory receptor, family 2, subfamily T, member 27
NM_001001827	OR2T35	1.071 down	olfactory receptor, family 2, subfamily T, member 35
NM_001001850	STX19	1.246 down	syntaxin 19
NM_001001851	ITIH5	1.305 up	inter-alpha (globulin) inhibitor H5
NM_001001852	PIM3	1.210 down	pim-3 oncogene
NM_001001870	MGC14376	3.743 up	hypothetical protein MGC14376
NM_001001871	HSFY1	1.028 up	heat shock transcription factor, Y-linked 1
NM_001001872	C14orf37	5.522 down	chromosome 14 open reading frame 37
NM_001001873	LOC283174	1.852 down	hypothetical protein LOC283174
NM_001001874	TPD52L3	1.117 down	tumor protein D52-like 3
NM_001001875	TPD52L3	1.274 down	tumor protein D52-like 3
NM_001001877	HSFY2	1.082 up	heat shock transcription factor, Y linked 2
NM_001001887	IFIT1	1.730 down	interferon-induced protein with tetratricopeptide repeats 1
NM_001001888	VCX-C	1.004 up	variably charged X-C
NM_001001890	RUNX1	5.573 up	runt-related transcription factor 1 (acute myeloid leukemia 1; aml1 oncogene)
NM_001001891	TMEM16G	1.180 up	transmembrane protein 16G
NM_001001894	TTC3	1.638 up	tetratricopeptide repeat domain 3
NM_001001895	UBASH3A	1.020 down	ubiquitin associated and SH3 domain containing, A
NM_001001912	OR4E2	1.002 down	olfactory receptor, family 4, subfamily E, member 2
NM_001001913	OR52N1	1.050 down	olfactory receptor, family 52, subfamily N, member 1
NM_001001914	OR2G3	1.164 down	olfactory receptor, family 2, subfamily G, member 3
NM_001001915	OR2G2	1.048 up	olfactory receptor, family 2, subfamily G, member 2
NM_001001916	OR52J3	1.151 down	olfactory receptor, family 52, subfamily J, member 3
NM_001001917	OR56A1	1.023 down	olfactory receptor, family 56, subfamily A, member 1
NM_001001918	OR5BF1	1.172 down	olfactory receptor, family 5, subfamily BF, member 1
NM_001001919	OR13C4	1.086 down	olfactory receptor, family 13, subfamily C, member 4
NM_001001920	OR4C15	1.108 down	olfactory receptor, family 4, subfamily C, member 15
NM_001001921	OR5AS1	1.035 down	olfactory receptor, family 5, subfamily AS, member 1
NM_001001922	OR52N5	1.067 down	olfactory receptor, family 52, subfamily N, member 5
NM_001001923	OR5C1	1.186 up	olfactory receptor, family 5, subfamily C, member 1
NM_001001924	MTUS1	1.483 up	mitochondrial tumor suppressor 1
NM_001001928	PPARA	1.746 up	peroxisome proliferative activated receptor, alpha
NM_001001933	LHX8	1.352 up	LIM homeobox 8
NM_001001935	N/A	1.106 down	Homo sapiens ATP synthase, H+ transporting, mitochondrial F1 complex, alpha subunit, isoform 1, cardiac muscle (ATP5A1), nuclear gene encoding mitochondrial protein, transcript variant 3, mRNA.
NM_001001936	KIAA1914	10.127 up	KIAA1914
NM_001001938	C9orf47	1.072 down	chromosome 9 open reading frame 47
NM_001001939	PCBD1	1.068 up	pterin-4 alpha-carbinolamine dehydratase/dimerization cofactor of hepatocyte nuclear factor 1 alpha (TCF1)
NM_001001952	OR5D18	1.045 down	olfactory receptor, family 5, subfamily D, member 18
NM_001001953	OR10G9	1.321 down	olfactory receptor, family 10, subfamily G, member 9
NM_001001954	OR5A2	1.078 down	olfactory receptor, family 5, subfamily A, member 2
NM_001001955	OR4C13	1.440 down	olfactory receptor, family 4, subfamily C, member 13
NM_001001956	OR13C9	1.012 up	olfactory receptor, family 13, subfamily C, member 9
NM_001001957	OR2W3	1.100 up	olfactory receptor, family 2, subfamily W, member 3
NM_001001958	OR7G3	1.009 down	olfactory receptor, family 7, subfamily G, member 3
NM_001001959	OR11L1	1.067 down	olfactory receptor, family 11, subfamily L, member 1
NM_001001960	OR5W2	1.083 down	olfactory receptor, family 5, subfamily W, member 2
NM_001001961	OR13C3	1.058 down	olfactory receptor, family 13, subfamily C, member 3
NM_001001963	OR2L8	1.156 down	olfactory receptor, family 2, subfamily L, member 8
NM_001001964	OR2T11	1.075 up	olfactory receptor, family 2, subfamily T, member 11
NM_001001965	OR4D5	1.014 up	olfactory receptor, family 4, subfamily D, member 5
NM_001001966	OR5AT1	1.039 down	olfactory receptor, family 5, subfamily AT, member 1
NM_001001967	OR5D13	1.055 down	olfactory receptor, family 5, subfamily D, member 13
NM_001001968	OR6S1	1.046 up	olfactory receptor, family 6, subfamily S, member 1
NM_001001971	FAM13C1	1.027 down	family with sequence similarity 13, member C1
NM_001001973	ATP5C1	1.156 up	ATP synthase, H+ transporting, mitochondrial F1 complex, gamma polypeptide 1
NM_001001974	PLEKHA1	1.099 down	pleckstrin homology domain containing, family A (phosphoinositide binding specific) member 1
NM_001001975	ATP5D	1.264 down	ATP synthase, H+ transporting, mitochondrial F1 complex, delta subunit
NM_001001976	ATE1	1.005 down	arginyltransferase 1
NM_001001977	ATP5E	1.000 down	ATP synthase, H+ transporting, mitochondrial F1 complex, epsilon subunit
NM_001001991	DKFZP586H2123	2.221 down	regeneration associated muscle protease
NM_001001992	USP16	1.119 down	ubiquitin specific peptidase 16
NM_001001994	GPM6B	2.481 down	glycoprotein M6B
NM_001001995	GPM6B	3.134 down	glycoprotein M6B
NM_001001996	GPM6B	4.229 down	glycoprotein M6B
NM_001001998	EXOSC10	1.126 down	exosome component 10
NM_001002	RPLP0	1.024 down	ribosomal protein, large, P0
NM_001002000	GMPR2	1.094 down	guanosine monophosphate reductase 2
NM_001002006	NT5C1B	1.162 up	5'-nucleotidase, cytosolic IB
NM_001002009	NT5C3	1.031 down	alt 'MGC27337#MGC87109#MGC87828#P5'N-1#PN-I#PSN1#UMPH#UMPH1#cN-III'; 5'-nucleotidase, cytosolic III
NM_001002010	NT5C3	1.001 up	alt 'MGC27337#MGC87109#MGC87828#P5'N-1#PN-I#PSN1#UMPH#UMPH1#cN-III'; 5'-nucleotidase, cytosolic III
NM_001002014	ATP5F1	1.044 down	ATP synthase, H+ transporting, mitochondrial F0 complex, subunit B1
NM_001002017	HCFC1R1	1.470 down	host cell factor C1 regulator 1 (XPO1 dependent)
NM_001002018	HCFC1R1	1.392 down	host cell factor C1 regulator 1 (XPO1 dependent)
NM_001002019	PUS1	1.702 down	pseudouridylate synthase 1
NM_001002021	PFKL	1.227 up	phosphofructokinase, liver
NM_001002026	CLDN18	1.056 up	claudin 18
NM_001002027	ATP5G1	1.318 down	ATP synthase, H+ transporting, mitochondrial F0 complex, subunit C1 (subunit 9)
NM_001002029	C4B	1.007 down	complement component 4B (Childo blood group)
NM_001002031	ATP5G2	1.535 down	ATP synthase, H+ transporting, mitochondrial F0 complex, subunit C2 (subunit 9)
NM_001002032	HN1	1.089 down	hematological and neurological expressed 1
NM_001002033	HN1	1.064 down	hematological and neurological expressed 1
NM_001002034	FAM109B	1.067 up	family with sequence similarity 109, member B
NM_001002035	DEFB108B	1.073 down	defensin, beta 108B
NM_001002036	ASTL	1.088 down	astacin-like metalloendopeptidase (M12 family)
NM_001002231	KLK2	1.046 up	kallikrein 2, prostatic
NM_001002233	RAB11FIP1	2.195 up	RAB11 family interacting protein 1 (class I)
NM_001002234	SCNM1	1.253 up	sodium channel modifier 1
NM_001002235	SERPINA1	1.054 down	serpin peptidase inhibitor, clade A (alpha-1 antiproteinase, antitrypsin), member 1
NM_001002243	AFTIPHILIN	1.192 up	aftiphilin protein
NM_001002244	ANAPC11	1.153 down	APC11 anaphase promoting complex subunit 11 homolog (yeast)
NM_001002245	ANAPC11	1.118 down	APC11 anaphase promoting complex subunit 11 homolog (yeast)
NM_001002246	ANAPC11	1.040 down	APC11 anaphase promoting complex subunit 11 homolog (yeast)
NM_001002249	ANAPC11	1.194 down	APC11 anaphase promoting complex subunit 11 homolog (yeast)
NM_001002251	ARL6IP4	1.018 down	ADP-ribosylation-like factor 6 interacting protein 4
NM_001002252	ARL6IP4	1.067 up	ADP-ribosylation-like factor 6 interacting protein 4
NM_001002254	DGAT2L4	1.015 down	diacylglycerol O-acyltransferase 2-like 4
NM_001002255	SUMO4	1.268 down	SMT3 suppressor of mif two 3 homolog 4 (S. cerevisiae)
NM_001002256	ATP5G3	1.170 down	ATP synthase, H+ transporting, mitochondrial F0 complex, subunit C3 (subunit 9)
NM_001002257	LYCAT	1.049 down	lysocardiolipin acyltransferase
NM_001002258	ATP5G3	1.160 down	ATP synthase, H+ transporting, mitochondrial F0 complex, subunit C3 (subunit 9)
NM_001002259	C1QDC1	1.685 down	C1q domain containing 1
NM_001002260	C9orf58	1.557 down	chromosome 9 open reading frame 58
NM_001002261	ZFYVE27	1.386 up	zinc finger, FYVE domain containing 27
NM_001002264	EPSTI1	2.971 up	epithelial stromal interaction 1 (breast)
NM_001002265	2011-03-08	1.325 up	membrane-associated ring finger (C3HC4) 8
NM_001002269	EXOSC3	1.730 down	exosome component 3
NM_001002273	FCGR2B	1.047 down	Fc fragment of IgG, low affinity IIb, receptor (CD32)
NM_001002292	GPR177	4.711 up	G protein-coupled receptor 177
NM_001002294	FMO3	1.097 down	flavin containing monooxygenase 3
NM_001002295	GATA3	12.350 up	GATA binding protein 3
NM_001002296	GOLGA7	1.263 up	golgi autoantigen, golgin subfamily a, 7
NM_001002755	HIRIP5	1.030 up	HIRA interacting protein 5
NM_001002756	HIRIP5	1.080 up	HIRA interacting protein 5
NM_001002758	PRY2	1.043 up	PTPN13-like, Y-linked 2
NM_001002759	C10orf78	1.238 down	chromosome 10 open reading frame 78
NM_001002760	BPY2B	1.026 down	basic charge, Y-linked, 2B
NM_001002762	DNAJB12	1.478 up	DnaJ (Hsp40) homolog, subfamily B, member 12
NM_001002796	MCTP1	2.011 up	multiple C2 domains, transmembrane 1
NM_001002799	SMC4L1	1.570 down	SMC4 structural maintenance of chromosomes 4-like 1 (yeast)
NM_001002810	PDE4DIP	1.308 up	phosphodiesterase 4D interacting protein (myomegalin)
NM_001002811	PDE4DIP	1.341 down	phosphodiesterase 4D interacting protein (myomegalin)
NM_001002814	RAB11FIP1	2.173 up	RAB11 family interacting protein 1 (class I)
NM_001002836	LOC126208	1.310 down	hypothetical protein LOC126208
NM_001002837	PIB5PA	1.292 down	phosphatidylinositol (4,5) bisphosphate 5-phosphatase, A
NM_001002838	WNK3	2.131 down	WNK lysine deficient protein kinase 3
NM_001002840	DKFZP434A0131	1.097 up	DKFZp434A0131 protein
NM_001002841	MYL4	1.170 up	myosin, light polypeptide 4, alkali; atrial, embryonic
NM_001002843	SUHW4	1.081 up	suppressor of hairy wing homolog 4 (Drosophila)
NM_001002844	SUHW4	1.052 down	suppressor of hairy wing homolog 4 (Drosophila)
NM_001002847	DERPC	1.144 up	decreased expression in renal and prostate
NM_001002848	LY6G5C	1.075 up	lymphocyte antigen 6 complex, locus G5C
NM_001002849	LY6G5C	1.128 up	lymphocyte antigen 6 complex, locus G5C
NM_001002857	ANXA2	2.059 up	annexin A2
NM_001002860	BTBD7	1.231 up	BTB (POZ) domain containing 7
NM_001002861	ARHGEF5	1.267 up	Rho guanine nucleotide exchange factor (GEF) 5
NM_001002862	DERL3	1.476 down	Der1-like domain family, member 3
NM_001002876	C22orf18	2.162 down	chromosome 22 open reading frame 18
NM_001002877	THOC5	1.010 up	THO complex 5
NM_001002880	PGEA1	1.091 up	PKD2 interactor, golgi and endoplasmic reticulum associated 1
NM_001002881	PIP5K3	1.064 up	phosphatidylinositol-3-phosphate/phosphatidylinositol 5-kinase, type III
NM_001002901	FCRLM2	1.115 down	Fc receptor-like and mucin-like 2
NM_001002905	OR8G1	1.209 down	olfactory receptor, family 8, subfamily G, member 1
NM_001002906	XKRY2	1.048 up	XK, Kell blood group complex subunit-related, Y-linked 2
NM_001002907	OR8K1	1.241 down	olfactory receptor, family 8, subfamily K, member 1
NM_001002909	KIAA0553	1.115 down	KIAA0553
NM_001002911	GPR139	1.207 down	G protein-coupled receptor 139
NM_001002912	C1orf173	1.059 down	chromosome 1 open reading frame 173
NM_001002913	PTRH1	1.054 down	peptidyl-tRNA hydrolase 1 homolog (S. cerevisiae)
NM_001002914	KCTD11	1.262 up	potassium channel tetramerisation domain containing 11
NM_001002915	IGFL2	1.051 up	insulin growth factor-like family member 2
NM_001002916	H2BFWT	1.003 down	H2B histone family, member W, testis-specific
NM_001002917	OR8D1	1.054 down	olfactory receptor, family 8, subfamily D, member 1
NM_001002918	OR8D2	1.088 down	olfactory receptor, family 8, subfamily D, member 2
NM_001002919	LOC285016	1.037 up	hypothetical protein LOC285016
NM_001002920	POTE8	1.015 down	protein expressed in prostate, ovary, testis, and placenta 8
NM_001002921	AK3L2	1.293 up	adenylate kinase 3-like 2
NM_001002923	IGFL4	1.021 up	insulin growth factor-like family member 4
NM_001002924	AP3S1	1.090 up	adaptor-related protein complex 3, sigma 1 subunit
NM_001002925	OR5AP2	1.003 down	olfactory receptor, family 5, subfamily AP, member 2
NM_001002926	TWISTNB	1.007 down	TWIST neighbor
NM_001003	RPLP1	1.147 down	ribosomal protein, large, P1
NM_001003395	TPD52L1	2.620 up	tumor protein D52-like 1
NM_001003396	TPD52L1	3.225 up	tumor protein D52-like 1
NM_001003397	TPD52L1	2.816 up	tumor protein D52-like 1
NM_001003398	BICD1	1.137 up	bicaudal D homolog 1 (Drosophila)
NM_001003399	DKFZp451A211	1.080 up	DKFZp451A211 protein
NM_001003406	CACNA1I	1.187 down	calcium channel, voltage-dependent, alpha 1I subunit
NM_001003407	ABLIM1	1.470 up	actin binding LIM protein 1
NM_001003443	OR56A3	1.003 down	olfactory receptor, family 56, subfamily A, member 3
NM_001003652	SMAD2	1.306 up	SMAD, mothers against DPP homolog 2 (Drosophila)
NM_001003656	PPP2R2D	1.068 up	protein phosphatase 2, regulatory subunit B, delta isoform
NM_001003665	C1orf95	1.100 down	chromosome 1 open reading frame 95
NM_001003674	C18orf1	1.041 up	chromosome 18 open reading frame 1
NM_001003676	C11orf49	1.217 up	chromosome 11 open reading frame 49
NM_001003677	C11orf49	1.195 up	chromosome 11 open reading frame 49
NM_001003678	C11orf49	1.238 up	chromosome 11 open reading frame 49
NM_001003679	LEPR	1.860 up	leptin receptor
NM_001003680	LEPR	2.164 up	leptin receptor
NM_001003681	HMG2L1	1.656 down	high-mobility group protein 2-like 1
NM_001003682	TTMB	1.032 up	TTMB protein
NM_001003683	PDE1A	1.076 up	phosphodiesterase 1A, calmodulin-dependent
NM_001003684	UCRC	none	ubiquinol-cytochrome c reductase complex (7.2 kD)
NM_001003686	PMS2L3	1.076 up	postmeiotic segregation increased 2-like 3
NM_001003688	SMAD1	1.166 down	SMAD, mothers against DPP homolog 1 (Drosophila)
NM_001003689	L3MBTL2	1.454 down	l(3)mbt-like 2 (Drosophila)
NM_001003690	MAD2L1BP	1.030 down	MAD2L1 binding protein
NM_001003692	ZMAT5	1.035 up	zinc finger, matrin type 5
NM_001003693	C6orf21	1.034 down	chromosome 6 open reading frame 21
NM_001003694	BRPF1	1.316 down	bromodomain and PHD finger containing, 1
NM_001003696	ATP5J	1.078 up	ATP synthase, H+ transporting, mitochondrial F0 complex, subunit F6
NM_001003697	ATP5J	1.243 up	ATP synthase, H+ transporting, mitochondrial F0 complex, subunit F6
NM_001003698	RREB1	1.823 up	ras responsive element binding protein 1
NM_001003701	ATP5J	1.146 up	ATP synthase, H+ transporting, mitochondrial F0 complex, subunit F6
NM_001003702	FLJ43692	1.434 up	ARHGEF5-like
NM_001003703	ATP5J	1.033 up	ATP synthase, H+ transporting, mitochondrial F0 complex, subunit F6
NM_001003704	MTP18	1.893 down	mitochondrial protein 18 kDa
NM_001003712	OSBPL8	1.257 up	oxysterol binding protein-like 8
NM_001003713	ATP5J2	1.271 down	ATP synthase, H+ transporting, mitochondrial F0 complex, subunit F2
NM_001003714	ATP5J2	1.294 down	ATP synthase, H+ transporting, mitochondrial F0 complex, subunit F2
NM_001003715	RECQL5	1.132 down	RecQ protein-like 5
NM_001003722	GLE1L	1.534 up	GLE1 RNA export mediator-like (yeast)
NM_001003725	WDR68	1.062 up	WD repeat domain 68
NM_001003745	OR10A3	1.422 up	olfactory receptor, family 10, subfamily A, member 3
NM_001003750	OR8I2	1.331 down	olfactory receptor, family 8, subfamily I, member 2
NM_001003760	KBTBD1	1.444 up	kelch repeat and BTB (POZ) domain containing 1
NM_001003785	ATP5H	1.215 down	ATP synthase, H+ transporting, mitochondrial F0 complex, subunit d
NM_001003786	LYK5	1.164 down	protein kinase LYK5
NM_001003789	RABL2B	1.208 up	RAB, member of RAS oncogene family-like 2B
NM_001003790	SPFH2	1.013 down	SPFH domain family, member 2
NM_001003791	SPFH2	1.086 down	SPFH domain family, member 2
NM_001003792	RBMS3	4.708 up	RNA binding motif, single stranded interacting protein
NM_001003794	MGLL	3.191 up	monoglyceride lipase
NM_001003795	GTF2IRD2B	2.440 up	GTF2IRD2 beta
NM_001003796	NHP2L1	1.457 down	NHP2 non-histone chromosome protein 2-like 1 (S. cerevisiae)
NM_001003799	TARP	1.105 down	TCR gamma alternate reading frame protein
NM_001003800	BICD2	1.417 up	bicaudal D homolog 2 (Drosophila)
NM_001003801	SMARCD3	1.276 down	SWI/SNF related, matrix associated, actin dependent regulator of chromatin, subfamily d, member 3
NM_001003803	ATP5S	1.110 down	ATP synthase, H+ transporting, mitochondrial F0 complex, subunit s (factor B)
NM_001003805	ATP5S	1.165 down	ATP synthase, H+ transporting, mitochondrial F0 complex, subunit s (factor B)
NM_001003807	RP3-377H14.5	1.152 down	hypothetical protein FLJ35429
NM_001003808	LOC339457	1.017 down	hypothetical protein LOC339457
NM_001003809	DLGAP1	3.191 down	discs, large (Drosophila) homolog-associated protein 1
NM_001003810	HNRPD	1.813 down	heterogeneous nuclear ribonucleoprotein D (AU-rich element RNA binding protein 1, 37kDa)
NM_001003811	TEX11	1.059 down	testis expressed sequence 11
NM_001003818	TRIM6	1.904 up	tripartite motif-containing 6
NM_001003819	TRIM6-TRIM34	1.235 up	tripartite motif-containing 6 and tripartite motif-containing 34
NM_001003827	TRIM34	1.188 up	tripartite motif-containing 34
NM_001003828	PARVB	1.019 down	parvin, beta
NM_001003841	SLC6A19	1.115 up	solute carrier family 6 (neutral amino acid transporter), member 19
NM_001003845	SP5	1.288 down	Sp5 transcription factor
NM_001003891	PCQAP	2.097 up	PC2 (positive cofactor 2, multiprotein complex) glutamine/Q-rich-associated protein
NM_001003892	DUPD1	1.017 down	dual specificity phosphatase and pro isomerase domain containing 1
NM_001003894	CDY1B	1.055 up	chromodomain protein, Y-linked, 1B
NM_001003895	CDY1B	1.012 up	chromodomain protein, Y-linked, 1B
NM_001003897	MANBAL	1.156 up	mannosidase, beta A, lysosomal-like
NM_001003927	EVI2A	1.190 up	ecotropic viral integration site 2A
NM_001003931	PARP3	1.185 up	poly (ADP-ribose) polymerase family, member 3
NM_001003936	TXNDC8	1.005 down	thioredoxin domain containing 8
NM_001003937	TSPYL6	1.191 up	TSPY-like 6
NM_001003938	HBM	1.057 up	hemoglobin mu chain
NM_001003940	BMF	4.377 up	Bcl2 modifying factor
NM_001003941	OGDH	1.153 down	oxoglutarate (alpha-ketoglutarate) dehydrogenase (lipoamide)
NM_001003954	ANXA13	1.019 down	annexin A13
NM_001003962	CAPNS1	1.353 up	calpain, small subunit 1
NM_001004	RPLP2	1.117 down	ribosomal protein, large, P2
NM_001004019	FBLN2	1.480 down	fibulin 2
NM_001004023	DYRK3	3.300 down	dual-specificity tyrosine-(Y)-phosphorylation regulated kinase 3
NM_001004051	GPRASP2	1.653 down	G protein-coupled receptor associated sorting protein 2
NM_001004052	OR52B2	1.005 down	olfactory receptor, family 52, subfamily B, member 2
NM_001004053	ACTBL1	1.345 down	actin, beta-like 1
NM_001004054	POTE2	1.168 down	protein expressed in prostate, ovary, testis, and placenta 2
NM_001004055	LRRC29	1.116 up	leucine rich repeat containing 29
NM_001004056	GRK4	1.319 up	G protein-coupled receptor kinase 4
NM_001004057	GRK4	1.316 up	G protein-coupled receptor kinase 4
NM_001004058	OR8K5	1.169 down	olfactory receptor, family 8, subfamily K, member 5
NM_001004059	OR4S2	1.028 up	olfactory receptor, family 4, subfamily S, member 2
NM_001004060	NOMO2	1.027 up	NODAL modulator 2
NM_001004063	OR4K1	1.518 down	olfactory receptor, family 4, subfamily K, member 1
NM_001004064	OR8J3	1.278 down	olfactory receptor, family 8, subfamily J, member 3
NM_001004065	AKAP2	3.309 up	A kinase (PRKA) anchor protein 2
NM_001004067	NOMO3	1.021 down	NODAL modulator 3
NM_001004105	GRK6	1.076 down	G protein-coupled receptor kinase 6
NM_001004106	GRK6	1.100 down	G protein-coupled receptor kinase 6
NM_001004124	OR4P4	1.101 down	olfactory receptor, family 4, subfamily P, member 4
NM_001004125	TUSC1	1.155 up	tumor suppressor candidate 1
NM_001004126	ZNF93	1.180 down	zinc finger protein 93 (HTF34)
NM_001004127	ALG11	1.230 down	asparagine-linked glycosylation 11 homolog (S. cerevisiae, alpha-1,2-mannosyltransferase)
NM_001004128	QSCN6	1.132 up	quiescin Q6
NM_001004134	OR10AD1	1.115 up	olfactory receptor, family 10, subfamily AD, member 1
NM_001004135	OR2A12	1.022 up	olfactory receptor, family 2, subfamily A, member 12
NM_001004136	OR2T2	1.004 down	olfactory receptor, family 2, subfamily T, member 2
NM_001004137	OR52M1	1.011 up	olfactory receptor, family 52, subfamily M, member 1
NM_001004195	OR4F4	1.630 down	olfactory receptor, family 4, subfamily F, member 4
NM_001004196	CD200	2.923 down	CD200 molecule
NM_001004285	DFFB	1.086 down	DNA fragmentation factor, 40kDa, beta polypeptide (caspase-activated DNase)
NM_001004297	OR13A1	1.054 down	olfactory receptor, family 13, subfamily A, member 1
NM_001004298	C10orf90	none	chromosome 10 open reading frame 90
NM_001004299	FLJ43980	1.098 up	FLJ43980 protein
NM_001004300	ZNF720	1.025 down	zinc finger protein 720
NM_001004301	FLJ16542	1.225 down	FLJ16542 protein
NM_001004302	LOC155060	1.195 down	hypothetical protein LOC155060
NM_001004303	C1orf168	none	chromosome 1 open reading frame 168
NM_001004304	ZNF740	1.106 up	zinc finger protein 740
NM_001004305	LOC284757	1.074 up	hypothetical protein LOC284757
NM_001004306	MGC87631	2.078 down	similar to hypothetical protein FLJ36492
NM_001004307	MGC33556	1.454 up	hypothetical LOC339541
NM_001004308	ZCCHC16	1.186 down	zinc finger, CCHC domain containing 16
NM_001004309	MGC75360	1.307 up	similar to zinc finger protein 29
NM_001004310	FCRL6	1.026 down	Fc receptor-like 6
NM_001004311	FIGLA	1.041 down	factor in the germline alpha
NM_001004312	RTP2	1.029 down	receptor transporter protein 2
NM_001004313	LOC388335	1.055 up	similar to RIKEN cDNA A730055C05 gene
NM_001004315	FLJ46210	1.009 up	FLJ46210 protein
NM_001004316	FLJ16641	1.010 up	FLJ16641 protein
NM_001004317	LIN28B	1.436 down	lin-28 homolog B (C. elegans)
NM_001004318	FLJ16165	1.149 down	FLJ16165 protein
NM_001004319	VHLL	1.116 down	von Hippel-Lindau tumor suppressor-like
NM_001004320	FLJ16237	1.021 down	hypothetical protein LOC392636
NM_001004321	FLJ45445	1.079 up	FLJ45445 protein
NM_001004322	FLJ38717	1.044 down	FLJ38717 protein
NM_001004323	LOC402573	1.667 up	hypothetical LOC402573
NM_001004325	KRTAP5-2	1.580 up	keratin associated protein 5-2
NM_001004326	FLJ16331	1.268 up	FLJ16331 protein
NM_001004327	FLJ42258	1.179 up	FLJ42258 protein
NM_001004328	ZNF705A	1.146 down	zinc finger protein 705A
NM_001004329	DBX2	1.076 up	developing brain homeobox 2
NM_001004330	FLJ46688	1.160 up	FLJ46688 protein
NM_001004331	MGC88374	1.042 down	similar to CG32662-PA
NM_001004332	FLJ41170	1.063 up	FLJ41170 protein
NM_001004333	MGC71993	1.425 up	similar to DNA segment, Chr 11, Brigham & Womens Genetics 0434 expressed
NM_001004334	GPR179	1.101 down	G protein-coupled receptor 179
NM_001004335	FLJ42842	1.060 up	FLJ42842 protein
NM_001004336	FLJ90757	1.196 up	hypothetical protein LOC440465
NM_001004338	EPHA10	1.138 down	EPH receptor A10
NM_001004339	ZYG11A	1.270 down	zyg-11 homolog A (C. elegans)
NM_001004340	LOC440607	1.126 up	Fc-gamma receptor I B2
NM_001004341	FLJ16478	1.326 down	FLJ16478 protein
NM_001004342	TRIM67	1.251 up	tripartite motif-containing 67
NM_001004343	MAP1LC3C	3.325 up	microtubule-associated protein 1 light chain 3 gamma
NM_001004344	MGC44328	1.167 up	hypothetical gene supported by BC033985
NM_001004345	FLJ16124	1.003 up	FLJ16124 protein
NM_001004346	MTHFD2L	1.064 down	methylenetetrahydrofolate dehydrogenase (NADP+ dependent) 2-like
NM_001004348	FLJ16171	1.007 down	FLJ16171 protein
NM_001004349	FLJ45422	1.138 up	FLJ45422 protein
NM_001004351	tcag7.1017	1.060 up	similar to Williams Beuren syndrome chromosome region 19
NM_001004352	FLJ16323	1.041 up	FLJ16323 protein
NM_001004353	LOC441476	1.206 down	hypothetical gene supported by AK097565; BC033939
NM_001004354	MGC61598	3.349 down	similar to ankyrin-repeat protein Nrarp
NM_001004355	RP11-308D16.4	1.156 down	FLJ31132 protein
NM_001004356	FGFRL1	1.089 down	fibroblast growth factor receptor-like 1
NM_001004360	DPP10	1.465 down	dipeptidyl-peptidase 10
NM_001004416	UMODL1	1.013 down	uromodulin-like 1
NM_001004417	FMNL2	1.201 up	formin-like 2
NM_001004419	CLEC2D	1.707 up	C-type lectin domain family 2, member D
NM_001004420	CLEC2D	1.345 up	C-type lectin domain family 2, member D
NM_001004426	PLA2G6	1.062 down	phospholipase A2, group VI (cytosolic, calcium-independent)
NM_001004430	MUC17	1.014 down	mucin 17, cell surface associated
NM_001004431	METRNL	2.697 up	meteorin, glial cell differentiation regulator-like
NM_001004432	LRRN6D	1.066 up	leucine rich repeat neuronal 6D
NM_001004433	SLC30A10	1.144 down	solute carrier family 30, member 10
NM_001004434	SLC30A2	1.027 down	solute carrier family 30 (zinc transporter), member 2
NM_001004439	ITGA11	1.632 up	integrin, alpha 11
NM_001004440	FAM19A3	1.087 down	family with sequence similarity 19 (chemokine (C-C motif)-like), member A3
NM_001004441	DP58	1.005 down	cytosolic phosphoprotein DP58
NM_001004450	OR1B1	1.086 up	olfactory receptor, family 1, subfamily B, member 1
NM_001004451	OR1J1	1.141 down	olfactory receptor, family 1, subfamily J, member 1
NM_001004452	OR1J4	1.110 down	olfactory receptor, family 1, subfamily J, member 4
NM_001004453	OR1L6	1.087 up	olfactory receptor, family 1, subfamily L, member 6
NM_001004454	OR1L8	1.069 down	olfactory receptor, family 1, subfamily L, member 8
NM_001004456	OR1M1	1.001 up	olfactory receptor, family 1, subfamily M, member 1
NM_001004457	OR1N2	1.083 down	olfactory receptor, family 1, subfamily N, member 2
NM_001004458	OR1S1	1.080 down	olfactory receptor, family 1, subfamily S, member 1
NM_001004459	OR1S2	1.194 down	olfactory receptor, family 1, subfamily S, member 2
NM_001004460	OR10A2	1.167 up	olfactory receptor, family 10, subfamily A, member 2
NM_001004461	OR10A6	1.516 up	olfactory receptor, family 10, subfamily A, member 6
NM_001004462	OR10G4	1.000 down	olfactory receptor, family 10, subfamily G, member 4
NM_001004463	OR10G7	1.182 down	olfactory receptor, family 10, subfamily G, member 7
NM_001004464	OR10G8	1.117 down	olfactory receptor, family 10, subfamily G, member 8
NM_001004465	OR10H4	1.122 down	olfactory receptor, family 10, subfamily H, member 4
NM_001004466	OR10H5	1.141 up	olfactory receptor, family 10, subfamily H, member 5
NM_001004467	OR10J3	1.071 down	olfactory receptor, family 10, subfamily J, member 3
NM_001004469	OR10J5	1.014 up	olfactory receptor, family 10, subfamily J, member 5
NM_001004470	ST8SIA6	1.087 up	ST8 alpha-N-acetyl-neuraminide alpha-2,8-sialyltransferase 6
NM_001004471	OR10Q1	1.049 down	olfactory receptor, family 10, subfamily Q, member 1
NM_001004472	OR10R2	1.181 down	olfactory receptor, family 10, subfamily R, member 2
NM_001004473	OR10K1	1.117 down	olfactory receptor, family 10, subfamily K, member 1
NM_001004474	OR10S1	1.093 down	olfactory receptor, family 10, subfamily S, member 1
NM_001004475	OR10T2	1.013 up	olfactory receptor, family 10, subfamily T, member 2
NM_001004476	OR10K2	1.362 down	olfactory receptor, family 10, subfamily K, member 2
NM_001004477	OR10X1	1.032 up	olfactory receptor, family 10, subfamily X, member 1
NM_001004478	OR10Z1	1.009 up	olfactory receptor, family 10, subfamily Z, member 1
NM_001004479	OR11H4	1.021 up	olfactory receptor, family 11, subfamily H, member 4
NM_001004480	OR11H6	1.053 down	olfactory receptor, family 11, subfamily H, member 6
NM_001004481	OR13C2	1.119 down	olfactory receptor, family 13, subfamily C, member 2
NM_001004482	OR13C5	1.002 up	olfactory receptor, family 13, subfamily C, member 5
NM_001004483	OR13C8	1.006 down	olfactory receptor, family 13, subfamily C, member 8
NM_001004484	OR13D1	1.064 up	olfactory receptor, family 13, subfamily D, member 1
NM_001004485	OR13F1	1.020 down	olfactory receptor, family 13, subfamily F, member 1
NM_001004486	OR13H1	1.104 down	olfactory receptor, family 13, subfamily H, member 1
NM_001004487	OR13J1	1.022 down	olfactory receptor, family 13, subfamily J, member 1
NM_001004488	OR2A25	1.074 up	olfactory receptor, family 2, subfamily A, member 25
NM_001004489	OR2AG1	1.132 down	olfactory receptor, family 2, subfamily AG, member 1
NM_001004490	OR2AG2	1.218 down	olfactory receptor, family 2, subfamily AG, member 2
NM_001004491	OR2AK2	1.081 down	olfactory receptor, family 2, subfamily AK, member 2
NM_001004492	OR2B11	1.048 up	olfactory receptor, family 2, subfamily B, member 11
NM_001004684	OR2D3	1.034 down	olfactory receptor, family 2, subfamily D, member 3
NM_001004685	OR2F2	1.083 down	olfactory receptor, family 2, subfamily F, member 2
NM_001004686	OR2L2	1.217 down	olfactory receptor, family 2, subfamily L, member 2
NM_001004687	OR2L3	1.310 down	olfactory receptor, family 2, subfamily L, member 3
NM_001004688	OR2M2	1.238 down	olfactory receptor, family 2, subfamily M, member 2
NM_001004689	OR2M3	1.252 down	olfactory receptor, family 2, subfamily M, member 3
NM_001004690	OR2M5	1.340 down	olfactory receptor, family 2, subfamily M, member 5
NM_001004691	OR2M7	1.013 down	olfactory receptor, family 2, subfamily M, member 7
NM_001004692	OR2T12	1.222 down	olfactory receptor, family 2, subfamily T, member 12
NM_001004693	OR2T10	1.047 down	olfactory receptor, family 2, subfamily T, member 10
NM_001004694	OR2T29	1.247 down	olfactory receptor, family 2, subfamily T, member 29
NM_001004695	OR2T33	1.342 down	olfactory receptor, family 2, subfamily T, member 33
NM_001004696	OR2T4	1.104 down	olfactory receptor, family 2, subfamily T, member 4
NM_001004697	OR2T5	1.036 down	olfactory receptor, family 2, subfamily T, member 5
NM_001004698	OR2W5	1.011 down	olfactory receptor, family 2, subfamily W, member 5
NM_001004699	OR2Z1	1.099 down	olfactory receptor, family 2, subfamily Z, member 1
NM_001004700	OR4C11	1.118 down	olfactory receptor, family 4, subfamily C, member 11
NM_001004701	OR4C16	1.062 down	olfactory receptor, family 4, subfamily C, member 16
NM_001004702	OR4C3	1.184 down	olfactory receptor, family 4, subfamily C, member 3
NM_001004703	OR4C46	1.140 down	olfactory receptor, family 4, subfamily C, member 46
NM_001004704	OR4C6	1.021 down	olfactory receptor, family 4, subfamily C, member 6
NM_001004705	OR4D10	1.115 down	olfactory receptor, family 4, subfamily D, member 10
NM_001004706	OR4D11	1.138 down	olfactory receptor, family 4, subfamily D, member 11
NM_001004707	OR4D2	1.100 down	olfactory receptor, family 4, subfamily D, member 2
NM_001004708	OR4D6	1.085 up	olfactory receptor, family 4, subfamily D, member 6
NM_001004711	OR4D9	1.066 down	olfactory receptor, family 4, subfamily D, member 9
NM_001004712	OR4K14	1.222 down	olfactory receptor, family 4, subfamily K, member 14
NM_001004713	OR1I1	1.049 down	olfactory receptor, family 1, subfamily I, member 1
NM_001004714	OR4K13	1.157 down	olfactory receptor, family 4, subfamily K, member 13
NM_001004715	OR4K17	1.034 down	olfactory receptor, family 4, subfamily K, member 17
NM_001004717	OR4L1	1.074 down	olfactory receptor, family 4, subfamily L, member 1
NM_001004719	OR4M2	1.507 down	olfactory receptor, family 4, subfamily M, member 2
NM_001004720	NCK2	1.333 up	NCK adaptor protein 2
NM_001004722	NCK2	1.242 up	NCK adaptor protein 2
NM_001004723	OR4N2	1.465 down	olfactory receptor, family 4, subfamily N, member 2
NM_001004724	OR4N5	1.226 down	olfactory receptor, family 4, subfamily N, member 5
NM_001004725	OR4S1	1.012 down	olfactory receptor, family 4, subfamily S, member 1
NM_001004726	OR4X1	1.108 down	olfactory receptor, family 4, subfamily X, member 1
NM_001004727	OR4X2	1.050 up	olfactory receptor, family 4, subfamily X, member 2
NM_001004728	OR5A1	1.026 up	olfactory receptor, family 5, subfamily A, member 1
NM_001004729	OR5AN1	1.067 down	olfactory receptor, family 5, subfamily AN, member 1
NM_001004730	OR5AR1	1.093 down	olfactory receptor, family 5, subfamily AR, member 1
NM_001004731	OR5AU1	1.039 down	olfactory receptor, family 5, subfamily AU, member 1
NM_001004732	OR5AY1	1.075 down	olfactory receptor, family 5, subfamily AY, member 1
NM_001004733	OR5B12	1.082 down	olfactory receptor, family 5, subfamily B, member 12
NM_001004734	OR5BU1	1.177 down	olfactory receptor, family 5, subfamily BU, member 1
NM_001004735	OR5D14	1.114 down	olfactory receptor, family 5, subfamily D, member 14
NM_001004736	OR5K1	1.105 down	olfactory receptor, family 5, subfamily K, member 1
NM_001004737	OR5K2	1.062 down	olfactory receptor, family 5, subfamily K, member 2
NM_001004738	OR5L1	1.104 down	olfactory receptor, family 5, subfamily L, member 1
NM_001004739	OR5L2	1.127 down	olfactory receptor, family 5, subfamily L, member 2
NM_001004740	OR5M1	1.118 down	olfactory receptor, family 5, subfamily M, member 1
NM_001004741	OR5M10	1.101 down	olfactory receptor, family 5, subfamily M, member 10
NM_001004742	OR5M3	1.131 down	olfactory receptor, family 5, subfamily M, member 3
NM_001004743	OR5M9	1.108 down	olfactory receptor, family 5, subfamily M, member 9
NM_001004744	OR5R1	1.100 down	olfactory receptor, family 5, subfamily R, member 1
NM_001004745	OR5T1	1.008 down	olfactory receptor, family 5, subfamily T, member 1
NM_001004746	OR5T2	1.047 down	olfactory receptor, family 5, subfamily T, member 2
NM_001004747	OR5T3	1.162 down	olfactory receptor, family 5, subfamily T, member 3
NM_001004748	OR51A2	1.202 down	olfactory receptor, family 51, subfamily A, member 2
NM_001004749	OR51A7	1.027 up	olfactory receptor, family 51, subfamily A, member 7
NM_001004750	OR51B6	1.097 down	alt 'HOR5'Beta6'; olfactory receptor, family 51, subfamily B, member 6
NM_001004751	OR51D1	1.020 up	olfactory receptor, family 51, subfamily D, member 1
NM_001004752	OR51F1	1.128 down	olfactory receptor, family 51, subfamily F, member 1
NM_001004753	OR51F2	1.065 down	olfactory receptor, family 51, subfamily F, member 2
NM_001004754	OR51I2	1.013 down	olfactory receptor, family 51, subfamily I, member 2
NM_001004755	OR51L1	1.025 down	olfactory receptor, family 51, subfamily L, member 1
NM_001004756	OR51M1	none	alt 'HOR5'Beta7#OR11-40'; olfactory receptor, family 51, subfamily M, member 1
NM_001004757	OR51Q1	1.193 down	olfactory receptor, family 51, subfamily Q, member 1
NM_001004758	OR51S1	1.192 down	olfactory receptor, family 51, subfamily S, member 1
NM_001004759	OR51T1	1.046 up	olfactory receptor, family 51, subfamily T, member 1
NM_001004760	OR51V1	1.142 down	olfactory receptor, family 51, subfamily V, member 1
NM_001005	RPS3	1.076 down	ribosomal protein S3
NM_001005158	SFMBT1	1.896 down	Scm-like with four mbt domains 1
NM_001005160	OR52A5	1.103 down	olfactory receptor, family 52, subfamily A, member 5
NM_001005161	OR52B4	1.091 down	olfactory receptor, family 52, subfamily B, member 4
NM_001005162	OR52B6	1.173 up	olfactory receptor, family 52, subfamily B, member 6
NM_001005163	OR52D1	1.023 down	olfactory receptor, family 52, subfamily D, member 1
NM_001005164	OR52E2	1.210 down	olfactory receptor, family 52, subfamily E, member 2
NM_001005165	OR52E4	1.041 down	olfactory receptor, family 52, subfamily E, member 4
NM_001005166	OR52E5	1.062 down	olfactory receptor, family 52, subfamily E, member 5
NM_001005167	OR52E6	1.114 down	olfactory receptor, family 52, subfamily E, member 6
NM_001005168	OR52E8	1.080 down	olfactory receptor, family 52, subfamily E, member 8
NM_001005169	OR52I1	1.005 up	olfactory receptor, family 52, subfamily I, member 1
NM_001005170	OR52I2	1.016 down	olfactory receptor, family 52, subfamily I, member 2
NM_001005171	OR52K1	1.006 down	olfactory receptor, family 52, subfamily K, member 1
NM_001005172	OR52K2	1.039 up	olfactory receptor, family 52, subfamily K, member 2
NM_001005173	OR52L1	1.026 down	olfactory receptor, family 52, subfamily L, member 1
NM_001005174	OR52N2	1.020 down	olfactory receptor, family 52, subfamily N, member 2
NM_001005175	OR52N4	1.393 down	olfactory receptor, family 52, subfamily N, member 4
NM_001005176	SP140	1.429 up	SP140 nuclear body protein
NM_001005177	OR52R1	1.057 up	olfactory receptor, family 52, subfamily R, member 1
NM_001005178	OR52W1	1.122 up	olfactory receptor, family 52, subfamily W, member 1
NM_001005179	OR56A4	1.065 up	olfactory receptor, family 56, subfamily A, member 4
NM_001005180	OR56B1	1.137 up	olfactory receptor, family 56, subfamily B, member 1
NM_001005181	OR56B4	1.063 down	olfactory receptor, family 56, subfamily B, member 4
NM_001005182	OR6C1	1.134 down	olfactory receptor, family 6, subfamily C, member 1
NM_001005183	OR6C76	1.067 down	olfactory receptor, family 6, subfamily C, member 76
NM_001005184	OR6K6	1.040 up	olfactory receptor, family 6, subfamily K, member 6
NM_001005185	OR6N1	1.010 down	olfactory receptor, family 6, subfamily N, member 1
NM_001005186	OR6Q1	1.032 down	olfactory receptor, family 6, subfamily Q, member 1
NM_001005187	OR6T1	1.127 down	olfactory receptor, family 6, subfamily T, member 1
NM_001005188	OR6X1	1.398 down	olfactory receptor, family 6, subfamily X, member 1
NM_001005189	OR6Y1	1.040 down	olfactory receptor, family 6, subfamily Y, member 1
NM_001005190	OR7A10	1.163 down	olfactory receptor, family 7, subfamily A, member 10
NM_001005191	OR7D4	1.042 down	olfactory receptor, family 7, subfamily D, member 4
NM_001005192	OR7G1	1.083 down	olfactory receptor, family 7, subfamily G, member 1
NM_001005193	OR7G2	1.069 up	olfactory receptor, family 7, subfamily G, member 2
NM_001005194	OR8A1	1.019 down	olfactory receptor, family 8, subfamily A, member 1
NM_001005195	OR8B12	1.020 down	olfactory receptor, family 8, subfamily B, member 12
NM_001005196	OR8B4	1.023 down	olfactory receptor, family 8, subfamily B, member 4
NM_001005197	OR8D4	1.125 down	olfactory receptor, family 8, subfamily D, member 4
NM_001005198	OR8G5	1.114 down	olfactory receptor, family 8, subfamily G, member 5
NM_001005199	OR8H1	1.263 down	olfactory receptor, family 8, subfamily H, member 1
NM_001005200	OR8H2	1.405 down	olfactory receptor, family 8, subfamily H, member 2
NM_001005201	OR8H3	1.474 down	olfactory receptor, family 8, subfamily H, member 3
NM_001005202	OR8K3	1.132 down	olfactory receptor, family 8, subfamily K, member 3
NM_001005203	OR8S1	1.001 down	olfactory receptor, family 8, subfamily S, member 1
NM_001005204	OR8U1	1.076 down	olfactory receptor, family 8, subfamily U, member 1
NM_001005205	OR8J1	1.080 up	olfactory receptor, family 8, subfamily J, member 1
NM_001005207	TRIM37	1.500 down	tripartite motif-containing 37
NM_001005209	MGC99813	1.038 up	similar to RIKEN cDNA A230078I05 gene
NM_001005210	LRRC55	1.612 down	leucine rich repeat containing 55
NM_001005211	OR9I1	1.004 down	olfactory receptor, family 9, subfamily I, member 1
NM_001005212	OR9Q1	1.027 up	olfactory receptor, family 9, subfamily Q, member 1
NM_001005213	OR9G1	1.009 down	olfactory receptor, family 9, subfamily G, member 1
NM_001005214	LRRC52	1.029 up	leucine rich repeat containing 52
NM_001005216	OR2J3	1.267 down	olfactory receptor, family 2, subfamily J, member 3
NM_001005217	FRG2	1.336 down	FSHD region gene 2 protein
NM_001005218	OR5B21	1.056 up	olfactory receptor, family 5, subfamily B, member 21
NM_001005221	OR4F29	1.087 down	olfactory receptor, family 4, subfamily F, member 29
NM_001005222	OR52A4	1.085 down	olfactory receptor, family 52, subfamily A, member 4
NM_001005226	OR2B3	1.038 down	olfactory receptor, family 2, subfamily B, member 3
NM_001005234	OR1L3	1.044 down	olfactory receptor, family 1, subfamily L, member 3
NM_001005235	OR1L4	1.167 up	olfactory receptor, family 1, subfamily L, member 4
NM_001005236	OR1L1	1.027 up	olfactory receptor, family 1, subfamily L, member 1
NM_001005237	OR51G1	1.069 down	olfactory receptor, family 51, subfamily G, member 1
NM_001005238	OR51G2	1.169 down	olfactory receptor, family 51, subfamily G, member 2
NM_001005239	OR11H1	1.639 down	olfactory receptor, family 11, subfamily H, member 1
NM_001005240	OR4F17	1.528 down	olfactory receptor, family 4, subfamily F, member 17
NM_001005241	OR4N4	1.149 down	olfactory receptor, family 4, subfamily N, member 4
NM_001005242	PKP2	4.638 up	plakophilin 2
NM_001005243	OR9K2	1.052 down	olfactory receptor, family 9, subfamily K, member 2
NM_001005245	OR5M11	1.120 down	olfactory receptor, family 5, subfamily M, member 11
NM_001005266	C15orf21	1.058 up	chromosome 15 open reading frame 21
NM_001005267	C15orf21	1.069 up	chromosome 15 open reading frame 21
NM_001005268	C15orf21	1.048 up	chromosome 15 open reading frame 21
NM_001005269	C15orf21	1.038 up	chromosome 15 open reading frame 21
NM_001005270	OR4C12	1.281 down	olfactory receptor, family 4, subfamily C, member 12
NM_001005271	CHD3	1.387 up	chromodomain helicase DNA binding protein 3
NM_001005272	OR4A5	1.311 down	olfactory receptor, family 4, subfamily A, member 5
NM_001005274	OR4A16	1.131 down	olfactory receptor, family 4, subfamily A, member 16
NM_001005275	OR4A15	1.151 down	olfactory receptor, family 4, subfamily A, member 15
NM_001005276	OR2AE1	1.038 down	olfactory receptor, family 2, subfamily AE, member 1
NM_001005278	OR6N2	1.039 up	olfactory receptor, family 6, subfamily N, member 2
NM_001005279	OR6K2	1.133 down	olfactory receptor, family 6, subfamily K, member 2
NM_001005280	OR10A7	1.189 down	olfactory receptor, family 10, subfamily A, member 7
NM_001005281	OR6B1	1.017 down	olfactory receptor, family 6, subfamily B, member 1
NM_001005282	OR5M8	1.182 down	olfactory receptor, family 5, subfamily M, member 8
NM_001005283	OR9Q2	1.047 up	olfactory receptor, family 9, subfamily Q, member 2
NM_001005284	OR9G4	1.137 down	olfactory receptor, family 9, subfamily G, member 4
NM_001005285	OR2AT4	1.105 up	olfactory receptor, family 2, subfamily AT, member 4
NM_001005286	OR6F1	1.096 down	olfactory receptor, family 6, subfamily F, member 1
NM_001005287	OR2A1	1.016 up	olfactory receptor, family 2, subfamily A, member 1
NM_001005288	OR51I1	1.022 down	olfactory receptor, family 51, subfamily I, member 1
NM_001005289	OR52H1	1.191 up	olfactory receptor, family 52, subfamily H, member 1
NM_001005290	PSRC1	1.195 down	proline/serine-rich coiled-coil 1
NM_001005291	SREBF1	1.053 up	sterol regulatory element binding transcription factor 1
NM_001005303	FLJ46347	1.025 down	hypothetical LOC389064
NM_001005323	OR5AK2	1.293 down	olfactory receptor, family 5, subfamily AK, member 2
NM_001005324	OR10V1	1.043 down	olfactory receptor, family 10, subfamily V, member 1
NM_001005325	OR6M1	1.055 down	olfactory receptor, family 6, subfamily M, member 1
NM_001005326	OR4F6	1.023 up	olfactory receptor, family 4, subfamily F, member 6
NM_001005327	OR6K3	1.173 down	olfactory receptor, family 6, subfamily K, member 3
NM_001005328	OR2A7	1.900 up	olfactory receptor, family 2, subfamily A, member 7
NM_001005329	OR51A4	1.250 down	olfactory receptor, family 51, subfamily A, member 4
NM_001005332	MAGED1	1.283 up	melanoma antigen family D, 1
NM_001005334	OR3A4	1.080 up	olfactory receptor, family 3, subfamily A, member 4
NM_001005335	HNRPL	1.431 down	heterogeneous nuclear ribonucleoprotein L
NM_001005336	DNM1	2.993 down	dynamin 1
NM_001005338	OR5H1	1.146 down	olfactory receptor, family 5, subfamily H, member 1
NM_001005339	RGS10	5.496 up	regulator of G-protein signalling 10
NM_001005340	GPNMB	1.052 up	glycoprotein (transmembrane) nmb
NM_001005353	AK3L1	1.173 up	adenylate kinase 3-like 1
NM_001005354	PRR13	1.086 up	proline rich 13
NM_001005355	PRR13	1.056 down	proline rich 13
NM_001005356	POTE14	1.215 down	protein expressed in prostate, ovary, testis, and placenta 14
NM_001005357	POTE14	1.198 down	protein expressed in prostate, ovary, testis, and placenta 14
NM_001005359	POTE2	1.173 down	protein expressed in prostate, ovary, testis, and placenta 2
NM_001005360	DNM2	1.007 down	dynamin 2
NM_001005364	POTE2	1.236 down	protein expressed in prostate, ovary, testis, and placenta 2
NM_001005365	POTE8	1.005 down	protein expressed in prostate, ovary, testis, and placenta 8
NM_001005366	FBXL10	1.345 down	F-box and leucine-rich repeat protein 10
NM_001005367	TTYH1	2.189 down	tweety homolog 1 (Drosophila)
NM_001005368	ZNF32	1.029 down	zinc finger protein 32 (KOX 30)
NM_001005369	MTIF2	1.306 down	mitochondrial translational initiation factor 2
NM_001005372	METTL2A	1.124 down	methyltransferase like 2A
NM_001005373	LRSAM1	1.131 up	leucine rich repeat and sterile alpha motif containing 1
NM_001005375	DAZ4	1.003 up	deleted in azoospermia 4
NM_001005376	PLAUR	1.767 up	plasminogen activator, urokinase receptor
NM_001005377	PLAUR	2.846 up	plasminogen activator, urokinase receptor
NM_001005386	ACTR2	1.389 up	ARP2 actin-related protein 2 homolog (yeast)
NM_001005387	NFASC	1.095 down	neurofascin homolog (chicken)
NM_001005388	NFASC	1.172 up	neurofascin homolog (chicken)
NM_001005389	NFASC	1.195 down	neurofascin homolog (chicken)
NM_001005404	YPEL2	2.523 up	yippee-like 2 (Drosophila)
NM_001005405	KRTAP5-11	1.454 up	keratin associated protein 5-11
NM_001005407	CACNA1H	2.917 down	calcium channel, voltage-dependent, alpha 1H subunit
NM_001005408	KIAA1787	1.192 down	KIAA1787 protein
NM_001005409	SF3A1	1.302 down	splicing factor 3a, subunit 1, 120kDa
NM_001005410	FCGR2C	1.262 down	Fc fragment of IgG, low affinity IIc, receptor for (CD32)
NM_001005411	FCGR2C	1.212 down	Fc fragment of IgG, low affinity IIc, receptor for (CD32)
NM_001005412	FCGR2C	1.224 down	Fc fragment of IgG, low affinity IIc, receptor for (CD32)
NM_001005413	ZWINT	1.895 down	ZW10 interactor
NM_001005414	ZWINT	2.024 down	ZW10 interactor
NM_001005415	2011-03-02	1.193 up	membrane-associated ring finger (C3HC4) 2
NM_001005417	B4GALT2	1.379 down	UDP-Gal:betaGlcNAc beta 1,4- galactosyltransferase, polypeptide 2
NM_001005463	EBF3	1.272 up	early B-cell factor 3
NM_001005464	H3/o	2.906 down	histone H3/o
NM_001005465	OR10G3	1.067 down	olfactory receptor, family 10, subfamily G, member 3
NM_001005466	OR10G2	1.083 down	olfactory receptor, family 10, subfamily G, member 2
NM_001005467	OR8B3	1.172 down	olfactory receptor, family 8, subfamily B, member 3
NM_001005468	OR8B2	1.077 down	olfactory receptor, family 8, subfamily B, member 2
NM_001005469	OR5B3	1.111 down	olfactory receptor, family 5, subfamily B, member 3
NM_001005470	OR4B1	1.091 down	olfactory receptor, family 4, subfamily B, member 1
NM_001005471	OR2T6	1.016 down	olfactory receptor, family 2, subfamily T, member 6
NM_001005472	LOC388524	1.459 down	similar to Laminin receptor 1
NM_001005473	PLCXD3	7.157 up	phosphatidylinositol-specific phospholipase C, X domain containing 3
NM_001005474	NFKBIZ	1.176 down	nuclear factor of kappa light polypeptide gene enhancer in B-cells inhibitor, zeta
NM_001005476	PKP4	1.340 down	plakophilin 4
NM_001005479	OR5H6	1.111 down	olfactory receptor, family 5, subfamily H, member 6
NM_001005480	OR2A2	1.115 up	olfactory receptor, family 2, subfamily A, member 2
NM_001005482	OR5H2	1.139 down	olfactory receptor, family 5, subfamily H, member 2
NM_001005483	OR4K5	1.212 down	olfactory receptor, family 4, subfamily K, member 5
NM_001005484	OR4F5	1.618 down	olfactory receptor, family 4, subfamily F, member 5
NM_001005486	OR4K15	1.229 down	olfactory receptor, family 4, subfamily K, member 15
NM_001005487	OR13G1	1.087 down	olfactory receptor, family 13, subfamily G, member 1
NM_001005489	OR5B17	1.031 down	olfactory receptor, family 5, subfamily B, member 17
NM_001005490	OR6C74	1.085 down	olfactory receptor, family 6, subfamily C, member 74
NM_001005491	OR10AG1	1.129 down	olfactory receptor, family 10, subfamily AG, member 1
NM_001005492	OR5J2	1.327 down	olfactory receptor, family 5, subfamily J, member 2
NM_001005493	OR6C6	1.001 down	olfactory receptor, family 6, subfamily C, member 6
NM_001005494	OR6C4	1.245 down	olfactory receptor, family 6, subfamily C, member 4
NM_001005495	OR2T3	1.003 up	olfactory receptor, family 2, subfamily T, member 3
NM_001005496	OR5D16	1.071 down	olfactory receptor, family 5, subfamily D, member 16
NM_001005497	OR6C75	1.156 down	olfactory receptor, family 6, subfamily C, member 75
NM_001005498	RHBDF2	1.390 up	rhomboid 5 homolog 2 (Drosophila)
NM_001005499	OR6C70	1.078 down	olfactory receptor, family 6, subfamily C, member 70
NM_001005500	OR4M1	1.400 down	olfactory receptor, family 4, subfamily M, member 1
NM_001005501	OR4K2	1.577 down	olfactory receptor, family 4, subfamily K, member 2
NM_001005502	CPM	1.778 up	carboxypeptidase M
NM_001005503	OR11G2	1.088 down	olfactory receptor, family 11, subfamily G, member 2
NM_001005504	OR4F21	1.001 up	olfactory receptor, family 4, subfamily F, member 21
NM_001005505	CACNA2D2	5.461 down	calcium channel, voltage-dependent, alpha 2/delta subunit 2
NM_001005512	OR4A47	1.160 down	olfactory receptor, family 4, subfamily A, member 47
NM_001005514	OR5H14	1.092 down	olfactory receptor, family 5, subfamily H, member 14
NM_001005515	OR5H15	1.179 down	olfactory receptor, family 5, subfamily H, member 15
NM_001005516	OR5K3	1.086 down	olfactory receptor, family 5, subfamily K, member 3
NM_001005517	OR5K4	1.165 down	olfactory receptor, family 5, subfamily K, member 4
NM_001005518	OR6C65	1.208 down	olfactory receptor, family 6, subfamily C, member 65
NM_001005519	OR6C68	1.022 down	olfactory receptor, family 6, subfamily C, member 68
NM_001005521	C21orf37	1.011 down	chromosome 21 open reading frame 37
NM_001005522	OR2T8	1.300 down	olfactory receptor, family 2, subfamily T, member 8
NM_001005526	SF3B1	1.158 up	splicing factor 3b, subunit 1, 155kDa
NM_001005527	FAM19A4	1.565 down	family with sequence similarity 19 (chemokine (C-C motif)-like), member A4
NM_001005566	OR5B2	1.043 down	olfactory receptor, family 5, subfamily B, member 2
NM_001005567	OR51B5	1.049 down	alt 'HOR5'Beta5#OR11-37'; olfactory receptor, family 51, subfamily B, member 5
NM_001005609	EDA	1.841 down	ectodysplasin A
NM_001005610	EDA	1.473 down	ectodysplasin A
NM_001005611	EDA	2.431 down	ectodysplasin A
NM_001005612	EDA	1.285 down	ectodysplasin A
NM_001005613	EDA	1.366 down	ectodysplasin A
NM_001005614	EDA	1.305 down	ectodysplasin A
NM_001005615	EDA	1.272 down	ectodysplasin A
NM_001005619	ITGB4	1.810 up	integrin, beta 4
NM_001005731	ITGB4	3.764 up	integrin, beta 4
NM_001005732	C21orf34	1.001 down	chromosome 21 open reading frame 34
NM_001005733	C21orf34	1.038 up	chromosome 21 open reading frame 34
NM_001005734	C21orf34	1.013 down	chromosome 21 open reading frame 34
NM_001005735	CHEK2	2.791 down	CHK2 checkpoint homolog (S. pombe)
NM_001005736	LYST	1.651 up	lysosomal trafficking regulator
NM_001005737	CACNA2D4	1.074 down	calcium channel, voltage-dependent, alpha 2/delta subunit 4
NM_001005738	FPRL1	1.002 down	formyl peptide receptor-like 1
NM_001005739	VPS54	1.467 up	vacuolar protein sorting 54 (yeast)
NM_001005743	NUMB	1.225 up	numb homolog (Drosophila)
NM_001005751	RP11-56A21.1	1.175 up	similar to KIAA0592 protein
NM_001005752	GJB3	2.710 up	gap junction protein, beta 3, 31kDa (connexin 31)
NM_001005753	VPS24	2.335 up	vacuolar protein sorting 24 homolog (S. cerevisiae)
NM_001005781	SUMO1	1.272 down	SMT3 suppressor of mif two 3 homolog 1 (S. cerevisiae)
NM_001005782	SUMO1	1.300 down	SMT3 suppressor of mif two 3 homolog 1 (S. cerevisiae)
NM_001005783	HAO2	1.007 up	hydroxyacid oxidase 2 (long chain)
NM_001005786	DAZ2	1.000 up	deleted in azoospermia 2
NM_001005845	ADAM9	3.620 up	ADAM metallopeptidase domain 9 (meltrin gamma)
NM_001005849	SUMO2	1.189 down	SMT3 suppressor of mif two 3 homolog 2 (S. cerevisiae)
NM_001005850	BC37295_3	1.050 down	hypothetical BC37295_3
NM_001005851	LOC163131	1.274 down	hypothetical BC331191_1
NM_001005852	CYorf15A	1.079 up	chromosome Y open reading frame 15A
NM_001005853	OR6B2	1.083 up	olfactory receptor, family 6, subfamily B, member 2
NM_001005855	ATP8B2	1.268 down	ATPase, Class I, type 8B, member 2
NM_001005861	RYK	1.040 down	RYK receptor-like tyrosine kinase
NM_001005862	ERBB2	2.526 down	v-erb-b2 erythroblastic leukemia viral oncogene homolog 2, neuro/glioblastoma derived oncogene homolog (avian)
NM_001005909	IHPK2	1.366 up	inositol hexaphosphate kinase 2
NM_001005910	IHPK2	1.032 up	inositol hexaphosphate kinase 2
NM_001005912	IHPK2	1.152 up	inositol hexaphosphate kinase 2
NM_001005914	SEMA3B	1.070 down	sema domain, immunoglobulin domain (Ig), short basic domain, secreted, (semaphorin) 3B
NM_001005915	ERBB3	1.271 up	v-erb-b2 erythroblastic leukemia viral oncogene homolog 3 (avian)
NM_001005920	LOC339123	1.055 down	hypothetical LOC339123
NM_001005922	KRTAP5-1	1.883 up	keratin associated protein 5-1
NM_001006	RPS3A	1.169 down	ribosomal protein S3A
NM_001006109	C3orf37	1.222 up	chromosome 3 open reading frame 37
NM_001006113	OATL1	1.063 up	ornithine aminotransferase-like 1
NM_001006114	C21orf57	1.740 down	chromosome 21 open reading frame 57
NM_001006115	IHPK1	1.163 up	inositol hexaphosphate kinase 1
NM_001006116	C21orf49	1.133 up	chromosome 21 open reading frame 49
NM_001006117	RBMY1J	1.026 up	RNA binding motif protein, Y-linked, family 1, member J
NM_001006118	RBMY1E	1.064 up	RNA binding motif protein, Y-linked, family 1, member E
NM_001006600	ERBB2IP	1.562 up	erbb2 interacting protein
NM_001006603	SYPL2	1.306 down	synaptophysin-like 2
NM_001006604	LOC387646	1.039 up	hypothetical LOC387646
NM_001006605	FAM69A	1.387 down	family with sequence similarity 69, member A
NM_001006606	LOC388882	1.021 down	hypothetical LOC388882
NM_001006607	LOC474170	1.081 down	c114 SLIT-like testicular protein
NM_001006608	STGC3	1.093 up	hypothetical STGC3
NM_001006610	SIAH1	1.301 down	seven in absentia homolog 1 (Drosophila)
NM_001006612	WBP5	1.717 up	WW domain binding protein 5
NM_001006613	WBP5	1.982 up	WW domain binding protein 5
NM_001006615	WDR31	1.331 up	WD repeat domain 31
NM_001006616	TSPAN17	1.004 up	tetraspanin 17
NM_001006617	MAPKAP1	1.336 up	mitogen-activated protein kinase associated protein 1
NM_001006618	MAPKAP1	1.306 up	mitogen-activated protein kinase associated protein 1
NM_001006622	WDR33	1.023 down	WD repeat domain 33
NM_001006623	WDR33	1.092 down	WD repeat domain 33
NM_001006624	PDPN	1.261 down	podoplanin
NM_001006633	CHRM2	1.065 up	cholinergic receptor, muscarinic 2
NM_001006634	ARHGAP17	1.045 down	Rho GTPase activating protein 17
NM_001006635	MTX2	1.249 down	metaxin 2
NM_001006636	GTDC1	1.657 up	glycosyltransferase-like domain containing 1
NM_001006637	RAB37	1.298 down	RAB37, member RAS oncogene family
NM_001006638	RAB37	1.435 down	RAB37, member RAS oncogene family
NM_001006639	TCEAL1	1.385 up	transcription elongation factor A (SII)-like 1
NM_001006640	TCEAL1	1.188 up	transcription elongation factor A (SII)-like 1
NM_001006641	SLC25A25	1.370 down	solute carrier family 25 (mitochondrial carrier; phosphate carrier), member 25
NM_001006655	DKFZP564J102	2.216 down	DKFZP564J102 protein
NM_001006656	ZNF473	1.564 down	zinc finger protein 473
NM_001006657	WDR35	2.965 down	WD repeat domain 35
NM_001006658	CR2	2.362 down	complement component (3d/Epstein Barr virus) receptor 2
NM_001006665	RPS6KA1	1.200 down	ribosomal protein S6 kinase, 90kDa, polypeptide 1
NM_001006666	APOBEC3F	1.194 up	apolipoprotein B mRNA editing enzyme, catalytic polypeptide-like 3F
NM_001006667	TAC3	1.772 down	tachykinin 3 (neuromedin K, neurokinin beta)
NM_001006681	SPIN-2	1.121 down	spindlin-like protein 2
NM_001006682	SPIN-2	1.033 down	spindlin-like protein 2
NM_001006684	TCEAL8	1.049 up	transcription elongation factor A (SII)-like 8
NM_001006932	RPS6KA2	1.549 up	ribosomal protein S6 kinase, 90kDa, polypeptide 2
NM_001006933	TCEAL3	1.086 down	transcription elongation factor A (SII)-like 3
NM_001006935	TCEAL4	1.143 up	transcription elongation factor A (SII)-like 4
NM_001006938	TCEAL6	1.165 down	transcription elongation factor A (SII)-like 6
NM_001006939	LRRC18	1.059 up	leucine rich repeat containing 18
NM_001006940	ALG3	1.266 down	asparagine-linked glycosylation 3 homolog (S. cerevisiae, alpha-1,3-mannosyltransferase)
NM_001006941	ALG3	1.412 down	asparagine-linked glycosylation 3 homolog (S. cerevisiae, alpha-1,3-mannosyltransferase)
NM_001006943	EPHA8	1.141 down	EPH receptor A8
NM_001006944	RPS6KA4	1.911 up	ribosomal protein S6 kinase, 90kDa, polypeptide 4
NM_001006945	C1orf103	1.052 up	chromosome 1 open reading frame 103
NM_001006946	SDC1	1.616 down	syndecan 1
NM_001006947	KIAA0701	1.844 down	KIAA0701 protein
NM_001007	RPS4X	1.134 down	ribosomal protein S4, X-linked
NM_001007022	ODF2L	1.692 up	outer dense fiber of sperm tails 2-like
NM_001007024	GOSR1	1.117 up	golgi SNAP receptor complex member 1
NM_001007026	ATN1	1.092 up	atrophin 1
NM_001007027	ALG8	1.692 down	asparagine-linked glycosylation 8 homolog (S. cerevisiae, alpha-1,3-glucosyltransferase)
NM_001007028	ALG8	1.662 down	asparagine-linked glycosylation 8 homolog (S. cerevisiae, alpha-1,3-glucosyltransferase)
NM_001007033	CLEC6A	1.231 down	C-type lectin domain family 6, member A
NM_001007067	SDCBP	1.868 up	syndecan binding protein (syntenin)
NM_001007071	RPS6KB2	1.326 up	ribosomal protein S6 kinase, 70kDa, polypeptide 2
NM_001007072	ZSCAN2	1.073 down	zinc finger and SCAN domain containing 2
NM_001007075	KLHL5	2.334 up	kelch-like 5 (Drosophila)
NM_001007088	ZNF21	1.270 down	zinc finger protein 21 (KOX 14)
NM_001007089	RESP18	1.019 down	regulated endocrine-specific protein 18
NM_001007090	C8orf48	1.220 up	chromosome 8 open reading frame 48
NM_001007094	ZNF37A	1.485 down	zinc finger protein 37a (KOX 21)
NM_001007097	NTRK2	4.038 up	neurotrophic tyrosine kinase, receptor, type 2
NM_001007098	SCP2	1.183 up	sterol carrier protein 2
NM_001007099	SCP2	1.520 up	sterol carrier protein 2
NM_001007101	ZNF484	1.229 down	zinc finger protein 484
NM_001007102	L3MBTL3	1.314 up	l(3)mbt-like 3 (Drosophila)
NM_001007122	FSD2	1.052 up	fibronectin type III and SPRY domain containing 2
NM_001007125	LOC198437	1.043 up	bA299N6.3
NM_001007139	C11orf43	17.089 up	chromosome 11 open reading frame 43
NM_001007156	NTRK3	1.064 down	neurotrophic tyrosine kinase, receptor, type 3
NM_001007157	PHF14	1.123 down	PHD finger protein 14
NM_001007169	ZNF483	1.022 up	zinc finger protein 483
NM_001007176	C8orf22	1.011 up	chromosome 8 open reading frame 22
NM_001007188	DEPDC5	1.009 up	DEP domain containing 5
NM_001007189	LOC492311	1.418 up	similar to bovine IgA regulatory protein
NM_001007214	CACYBP	1.754 down	calcyclin binding protein
NM_001007224	GIMAP6	1.056 up	GTPase, IMAP family member 6
NM_001007225	IGF2BP2	1.369 up	insulin-like growth factor 2 mRNA binding protein 2
NM_001007226	SPOP	1.385 down	speckle-type POZ protein
NM_001007231	ARHGAP25	1.061 down	Rho GTPase activating protein 25
NM_001007232	INCA	1.068 down	inhibitory caspase recruitment domain (CARD) protein
NM_001007234	ERCC8	1.002 up	excision repair cross-complementing rodent repair deficiency, complementation group 8
NM_001007236	ERVK6	4.855 down	endogenous retroviral sequence K, 6
NM_001007237	IGSF3	1.836 up	immunoglobulin superfamily, member 3
NM_001007238	HRES1	1.119 up	HTLV-1 related endogenous sequence
NM_001007239	KIAA0859	1.793 down	KIAA0859
NM_001007240	GP2	1.053 up	glycoprotein 2 (zymogen granule membrane)
NM_001007245	IFRD1	1.079 up	interferon-related developmental regulator 1
NM_001007246	BRWD1	1.145 up	bromodomain and WD repeat domain containing 1
NM_001007247	ZNF599	1.153 up	zinc finger protein 599
NM_001007249	OR8G2	1.246 down	olfactory receptor, family 8, subfamily G, member 2
NM_001007253	ERV3	1.795 up	endogenous retroviral sequence 3 (includes zinc finger protein H-plk/HPF9)
NM_001007254	ATP6V1C1	1.025 up	ATPase, H+ transporting, lysosomal 42kDa, V1 subunit C1
NM_001007255	KARCA1	1.020 down	kelch/ankyrin repeat containing cyclin A1 interacting protein
NM_001007256	KARCA1	1.034 down	kelch/ankyrin repeat containing cyclin A1 interacting protein
NM_001007257	PRDM2	1.726 up	PR domain containing 2, with ZNF domain
NM_001007258	SETD4	1.012 down	SET domain containing 4
NM_001007259	SETD4	1.042 up	SET domain containing 4
NM_001007260	SETD4	1.082 up	SET domain containing 4
NM_001007261	SETD4	1.009 up	SET domain containing 4
NM_001007262	SETD4	1.011 up	SET domain containing 4
NM_001007267	PLA2R1	1.268 up	phospholipase A2 receptor 1, 180kDa
NM_001007269	GEMIN7	1.069 down	gem (nuclear organelle) associated protein 7
NM_001007270	GEMIN7	1.180 down	gem (nuclear organelle) associated protein 7
NM_001007271	DUSP13	1.001 down	dual specificity phosphatase 13
NM_001007272	DUSP13	1.122 down	dual specificity phosphatase 13
NM_001007273	DUSP13	1.197 down	dual specificity phosphatase 13
NM_001007274	DUSP13	1.203 down	dual specificity phosphatase 13
NM_001007275	DUSP13	1.242 down	dual specificity phosphatase 13
NM_001007277	EI24	1.284 down	etoposide induced 2.4 mRNA
NM_001007278	RFP2	1.330 up	ret finger protein 2
NM_001007279	RRP22	1.015 down	RAS-related on chromosome 22
NM_001007464	RWDD1	1.040 down	RWD domain containing 1
NM_001007466	TULP4	1.379 up	tubby like protein 4
NM_001007467	SFI1	1.073 down	Sfi1 homolog, spindle assembly associated (yeast)
NM_001007468	SMARCB1	1.173 down	SWI/SNF related, matrix associated, actin dependent regulator of chromatin, subfamily b, member 1
NM_001007469	HCST	1.056 down	hematopoietic cell signal transducer
NM_001007470	TRPM3	6.467 down	transient receptor potential cation channel, subfamily M, member 3
NM_001007471	TRPM3	1.108 down	transient receptor potential cation channel, subfamily M, member 3
NM_001007523	F8A2	1.087 up	coagulation factor VIII-associated (intronic transcript) 2
NM_001007525	LOC284434	1.048 up	hypothetical protein LOC284434
NM_001007526	RBMY1A1	1.016 up	RNA binding motif protein, Y-linked, family 1, member A1
NM_001007527	LMBRD2	1.681 up	LMBR1 domain containing 2
NM_001007529	FLJ40194	1.038 down	FLJ40194 protein
NM_001007530	CDRT15	1.110 up	CDRT15 protein
NM_001007531	C6orf194	1.149 up	chromosome 6 open reading frame 194
NM_001007532	STH	1.009 up	saitohin
NM_001007533	DYSFIP1	1.267 down	dysferlin interacting protein 1 (toonin)
NM_001007534	C3orf56	1.063 up	chromosome 3 open reading frame 56
NM_001007535	dJ341D10.1	1.096 up	dJ341D10.1 (novel protein)
NM_001007536	AKR1CL1	1.026 up	aldo-keto reductase family 1, member C-like 1
NM_001007537	LOC387911	1.227 down	similar to hypothetical protein MGC48915
NM_001007538	TMEM46	1.925 down	transmembrane protein 46
NM_001007540	LOC389118	1.044 down	VLLR9392
NM_001007542	FLJ40453	1.002 down	FLJ40453 protein
NM_001007543	C11orf37	1.143 down	chromosome 11 open reading frame 37
NM_001007544	C1orf186	1.067 down	chromosome 1 open reading frame 186
NM_001007546	FLJ46838	1.223 up	FLJ46838 protein
NM_001007551	RP13-36C9.6	1.315 down	cancer/testis antigen CT45-5
NM_001007553	CSDE1	1.066 up	cold shock domain containing E1, RNA-binding
NM_001007559	SS18	1.247 up	synovial sarcoma translocation, chromosome 18
NM_001007560	C14orf70	1.030 down	chromosome 14 open reading frame 70
NM_001007561	IRGQ	1.133 up	immunity-related GTPase family, Q
NM_001007563	IGFBPL1	1.832 down	insulin-like growth factor binding protein-like 1
NM_001007565	TFG	1.097 up	TRK-fused gene
NM_001007595	NLF2	1.027 up	nuclear localized factor 2
NM_001007792	NTRK1	1.193 up	neurotrophic tyrosine kinase, receptor, type 1
NM_001007793	BUB3	1.253 down	BUB3 budding uninhibited by benzimidazoles 3 homolog (yeast)
NM_001007794	CEPT1	1.243 up	choline/ethanolamine phosphotransferase 1
NM_001007795	TTC6	1.029 down	tetratricopeptide repeat domain 6
NM_001008	RPS4Y1	1.031 up	ribosomal protein S4, Y-linked 1
NM_001008211	OPTN	1.885 up	optineurin
NM_001008215	MGC52110	1.003 down	hypothetical protein MGC52110
NM_001008218	AMY1B	1.034 up	amylase, alpha 1B; salivary
NM_001008220	CPLX2	1.452 down	complexin 2
NM_001008222	ZDHHC9	1.278 up	zinc finger, DHHC-type containing 9
NM_001008223	C1QL4	1.077 down	complement component 1, q subcomponent-like 4
NM_001008224	UACA	1.314 up	uveal autoantigen with coiled-coil domains and ankyrin repeats
NM_001008225	CNOT4	1.239 down	CCR4-NOT transcription complex, subunit 4
NM_001008226	DKFZp666G057	1.243 down	hypothetical protein DKFZp666G057
NM_001008228	MOG	1.054 up	alt 'MGC26137#MOG IG-2''; myelin oligodendrocyte glycoprotein
NM_001008229	MOG	1.058 down	alt 'MGC26137#MOG IG-2''; myelin oligodendrocyte glycoprotein
NM_001008234	LOC400657	1.003 down	hypothetical gene supported by BC036588
NM_001008235	GTPBP8	1.260 down	GTP-binding protein 8 (putative)
NM_001008237	LOC130502	1.084 up	similar to CG14894-PA
NM_001008239	C18orf25	1.537 up	chromosome 18 open reading frame 25
NM_001008269	TMEM89	1.200 down	transmembrane protein 89
NM_001008270	LOC136242	1.709 up	similar to RIKEN cDNA 1700016G05
NM_001008272	TAGLN3	1.642 down	transgelin 3
NM_001008273	TAGLN3	1.716 down	transgelin 3
NM_001008274	TRIM72	1.029 down	tripartite motif-containing 72
NM_001008387	REG3G	1.046 down	regenerating islet-derived 3 gamma
NM_001008388	LOC493856	1.187 down	similar to RIKEN cDNA 1500009M05 gene
NM_001008389	UMOD	1.101 down	uromodulin (uromucoid, Tamm-Horsfall glycoprotein)
NM_001008390	CGGBP1	1.127 up	CGG triplet repeat binding protein 1
NM_001008391	CCDC73	1.170 down	coiled-coil domain containing 73
NM_001008392	CTDSPL	3.294 up	CTD (carboxy-terminal domain, RNA polymerase II, polypeptide A) small phosphatase-like
NM_001008393	LOC201725	1.392 down	hypothetical protein LOC201725
NM_001008394	EID3	2.110 up	E1A-like inhibitor of differentiation 3
NM_001008395	LOC389541	1.528 down	similar to CG14977-PA
NM_001008396	WDHD1	2.552 down	WD repeat and HMG-box DNA binding protein 1
NM_001008397	LOC493869	1.022 up	similar to RIKEN cDNA 2310016C16
NM_001008401	FLJ16231	1.044 down	FLJ16231 protein
NM_001008404	LOC400258	1.006 up	similar to RIKEN cDNA A530016L24 gene
NM_001008405	BCAP29	2.231 up	B-cell receptor-associated protein 29
NM_001008406	BCAP29	1.646 up	B-cell receptor-associated protein 29
NM_001008407	BCAP29	1.710 up	B-cell receptor-associated protein 29
NM_001008408	RBM33	1.036 up	RNA binding motif protein 33
NM_001008409	TTLL9	1.100 up	tubulin tyrosine ligase-like family, member 9
NM_001008410	STEAP3	1.023 up	STEAP family member 3
NM_001008411	TDG	1.689 down	thymine-DNA glycosylase
NM_001008485	SLC41A3	1.548 up	solute carrier family 41, member 3
NM_001008487	SLC41A3	1.679 up	solute carrier family 41, member 3
NM_001008489	PHOSPHO2	1.300 down	phosphatase, orphan 2
NM_001008490	KLF6	4.038 up	Kruppel-like factor 6
NM_001008491	2011-09-02	1.124 up	septin 2
NM_001008493	ENAH	1.102 down	enabled homolog (Drosophila)
NM_001008494	RAXLX	1.022 up	RAX-like homeobox
NM_001008495	TMEM64	3.027 down	transmembrane protein 64
NM_001008496	PIWIL3	1.038 down	piwi-like 3 (Drosophila)
NM_001008503	OPRM1	1.020 down	opioid receptor, mu 1
NM_001008504	OPRM1	1.038 down	opioid receptor, mu 1
NM_001008505	OPRM1	1.045 down	opioid receptor, mu 1
NM_001008528	MXRA7	2.586 up	matrix-remodelling associated 7
NM_001008529	MXRA7	2.216 up	matrix-remodelling associated 7
NM_001008530	LGMN	1.225 up	legumain
NM_001008534	AKAP14	1.034 down	A kinase (PRKA) anchor protein 14
NM_001008535	AKAP14	1.111 down	A kinase (PRKA) anchor protein 14
NM_001008536	TCHHL1	1.003 down	trichohyalin-like 1
NM_001008537	RP11-130N24.1	1.145 down	KIAA2022 protein
NM_001008539	SLC7A2	3.159 up	solute carrier family 7 (cationic amino acid transporter, y+ system), member 2
NM_001008540	CXCR4	2.003 up	chemokine (C-X-C motif) receptor 4
NM_001008541	MXI1	1.248 up	MAX interactor 1
NM_001008544	NUP35	3.015 down	nucleoporin 35kDa
NM_001008563	USP20	1.219 up	ubiquitin specific peptidase 20
NM_001008564	NUPL1	1.157 down	nucleoporin like 1
NM_001008565	NUPL1	1.056 down	nucleoporin like 1
NM_001008566	TPST2	1.342 down	tyrosylprotein sulfotransferase 2
NM_001008567	TSC1	1.648 up	tuberous sclerosis 1
NM_001008568	TRMU	1.399 down	tRNA 5-methylaminomethyl-2-thiouridylate methyltransferase
NM_001008569	TRMU	1.284 down	tRNA 5-methylaminomethyl-2-thiouridylate methyltransferase
NM_001008570	TRMU	1.341 down	tRNA 5-methylaminomethyl-2-thiouridylate methyltransferase
NM_001008571	TRMU	1.395 down	tRNA 5-methylaminomethyl-2-thiouridylate methyltransferase
NM_001008572	TTLL1	1.385 up	tubulin tyrosine ligase-like family, member 1
NM_001008657	TCOF1	1.188 down	Treacher Collins-Franceschetti syndrome 1
NM_001008658	TUBGCP6	none	tubulin, gamma complex associated protein 6
[truncated: 22,001 more rows]
